# Supplementary material
Source: Research Square preprint supplement (doi:10.21203/rs.3.rs-9591486/v1)
Supplement: Supplementary file 1 [file a2bbd8231dd7597d03a5fa4f.pdf]

# Supplementary Materials

## Contents

|                                                                                                 |    |
|-------------------------------------------------------------------------------------------------|----|
| <i>Supplementary materials for farm-level analysis</i> .....                                    | 3  |
| Table 1 Detailed farm-level quantitative data for each state .....                              | 3  |
| <i>Supplementary materials for flight-level analysis</i> .....                                  | 4  |
| Table 2 Detailed short-range flight-level quantitative data for each origin state .....         | 4  |
| Table 3 Detailed medium-range flight-level quantitative data for each origin state.....         | 6  |
| Table 4 Detailed long-range flight-level quantitative data for each origin state .....          | 8  |
| Table 5 Detailed short-range flight-level quantitative data for each destination state .....    | 9  |
| Table 6 Detailed medium-range flight-level quantitative data for each destination state.....    | 11 |
| Table 7 Detailed long-range flight-level quantitative data for each destination state.....      | 13 |
| <i>Supplementary materials for flight schedule optimization</i> .....                           | 14 |
| Table 8 Optimized farm-level quantitative data for each state.....                              | 14 |
| Table 9 Optimized short-range flight-level quantitative data for each origin state.....         | 15 |
| Table 10 Optimized medium-range flight-level quantitative data for each origin state .....      | 17 |
| Table 11 Optimized long-range flight-level quantitative data for each origin state.....         | 19 |
| Table 12 Optimized short-range flight-level quantitative data for each destination state .....  | 20 |
| Table 13 Optimized medium-range flight-level quantitative data for each destination state ..... | 22 |
| Table 14 Optimized long-range flight-level quantitative data for each destination state .....   | 24 |
| <i>Supplementary materials for farm-and-flight selection optimization</i> .....                 | 25 |
| Table 15 Detailed quantitative data for each solar farm and flight market penetration rate..... | 25 |
| Table 16 System parameters .....                                                                | 28 |
| Table 17 Notation for optimization .....                                                        | 29 |
| Figure 1 10% Solar farm selection across different flight market penetration rates .....        | 31 |
| Figure 2 20% Solar farm selection across different flight market penetration rates .....        | 33 |
| Figure 3 30% Solar farm selection across different flight market penetration rates .....        | 35 |
| Figure 4 40% Solar farm selection across different flight market penetration rates .....        | 37 |
| Figure 5 50% Solar farm selection across different flight market penetration rates .....        | 39 |

|                                                                                                                  |           |
|------------------------------------------------------------------------------------------------------------------|-----------|
| <b>Figure 6 60% Solar farm selection across different flight market penetration rates .....</b>                  | <b>41</b> |
| <b>Figure 7 70% Solar farm selection across different flight market penetration rates .....</b>                  | <b>43</b> |
| <b>Figure 8 80% Solar farm selection across different flight market penetration rates .....</b>                  | <b>45</b> |
| <b>Figure 9 90% Solar farm selection across different flight market penetration rates .....</b>                  | <b>47</b> |
| <b>Figure 10 100% Solar farm selection across different flight market penetration rates.....</b>                 | <b>49</b> |
| <b>Figure 11 10% Flight selection across different solar farm market penetration rates .....</b>                 | <b>51</b> |
| <b>Figure 12 20% Flight selection across different solar farm market penetration rates .....</b>                 | <b>53</b> |
| <b>Figure 13 30% Flight selection across different solar farm market penetration rates .....</b>                 | <b>55</b> |
| <b>Figure 14 40% Flight selection across different solar farm market penetration rates .....</b>                 | <b>57</b> |
| <b>Figure 15 50% Flight selection across different solar farm market penetration rates .....</b>                 | <b>59</b> |
| <b>Figure 16 60% Flight selection across different solar farm market penetration rates .....</b>                 | <b>61</b> |
| <b>Figure 17 70% Flight selection across different solar farm market penetration rates .....</b>                 | <b>63</b> |
| <b>Figure 18 80% Flight selection across different solar farm market penetration rates .....</b>                 | <b>65</b> |
| <b>Figure 19 90% Flight selection across different solar farm market penetration rates .....</b>                 | <b>67</b> |
| <b>Figure 20 100% Flight selection across different solar farm market penetration rates .....</b>                | <b>69</b> |
| <b><i>Supplementary materials for case study.....</i></b>                                                        | <b>70</b> |
| <b>Note 1 Solar farm case study .....</b>                                                                        | <b>70</b> |
| <b>Figure 21 Location and power transfer range of the selected solar farm in the solar farm case study .....</b> | <b>70</b> |
| <b>Figure 22 Flights supported by the selected solar farm in the solar farm case study .....</b>                 | <b>71</b> |
| <b>Figure 23 Energy supplied by the selected solar farm in the solar farm case study .....</b>                   | <b>72</b> |
| <b>Note 2 Flight case study .....</b>                                                                            | <b>73</b> |
| <b>Figure 24 Selected flight and associated solar farms in the flight case study .....</b>                       | <b>73</b> |
| <b>Figure 25 Power received by the selected flight in the flight case study .....</b>                            | <b>74</b> |

## Supplementary materials for farm-level analysis

Table 1 Detailed farm-level quantitative data for each state

| State | CO2 Reduction (kg) | Fuel Cost Saving (\$) | Total Capacity (MW) | Total Cost Saving (\$) |
|-------|--------------------|-----------------------|---------------------|------------------------|
| AL    | 556974.2657        | 112878.8373           | 256.76986           | 218703.9478            |
| AR    | 876300.7793        | 173863.672            | 404.61088           | 340360.82              |
| AZ    | 3017590.654        | 588157.7422           | 1645.53446          | 1161499.967            |
| CA    | 17181113.66        | 3305289.062           | 6431.68858          | 6569700.657            |
| CO    | 1561134.509        | 305504.6171           | 697.46016           | 602120.1737            |
| FL    | 8909972.495        | 1869012.351           | 1695.06584          | 3561907.125            |
| GA    | 4082156.589        | 836149.9182           | 1402.273            | 1611759.67             |
| IA    | 464332.918         | 95946.34634           | 125.00532           | 184169.6008            |
| ID    | 125733.3259        | 25591.68148           | 157.20628           | 49481.0134             |
| IL    | 1193829.439        | 242271.8002           | 387.46052           | 469099.3935            |
| IN    | 1518178.529        | 273582.4831           | 521.15204           | 562036.4036            |
| LA    | 81183.21991        | 15671.7725            | 87.02766            | 31096.58428            |
| MI    | 1041404.032        | 215962.615            | 247.55984           | 413829.381             |
| MN    | 49703.78104        | 9905.506331           | 62.25778            | 19349.22473            |
| MS    | 540647.1784        | 112234.5774           | 198.93006           | 214957.5413            |
| MT    | 38925.22086        | 8197.913744           | 67.30136            | 15593.70571            |
| NC    | 4880328.908        | 1019063.718           | 723.1281            | 1946326.21             |
| NM    | 872322.0105        | 175269.5494           | 463.5394            | 341010.7314            |
| NV    | 3530085.419        | 689993.0423           | 1923.84938          | 1360709.272            |
| OH    | 2564415.477        | 500633.0263           | 772.44572           | 987871.9668            |
| OK    | 50672.7783         | 10500.49116           | 42.3656             | 20128.31903            |
| OR    | 30948.67192        | 6005.713342           | 86.8029             | 11885.96101            |
| PA    | 615774.8352        | 130405.9671           | 59.97754            | 247403.1858            |
| SC    | 2400951.603        | 504176.4466           | 438.37744           | 960357.2511            |
| SD    | 119388.3351        | 24889.58036           | 92.6355             | 47573.36403            |
| TN    | 626481.4339        | 128455.4216           | 146.68454           | 247486.894             |
| TX    | 8723495.937        | 1612672.469           | 7530.43948          | 3270136.697            |
| UT    | 1605029.542        | 331368.0006           | 988.9374            | 636323.6136            |
| VA    | 5279426.642        | 1074306.708           | 930.11296           | 2077397.77             |
| WA    | 23512.79787        | 4523.616762           | 89.545              | 8991.048357            |
| WI    | 1077429.417        | 219769.6721           | 582.71876           | 424481.2613            |
| WY    | 283544.8799        | 57624.76251           | 94.46618            | 111498.2897            |
| Total | 73922989.28        | 14679879.08           | 29353.32954         | 28725247.04            |

## Supplementary materials for flight-level analysis

Table 2 Detailed short-range flight-level quantitative data for each origin state

| State | CO2 Reduction (kg) | Fuel Cost Saving (\$) | Total Flight Distance (km) | Total Cost Saving (\$) |
|-------|--------------------|-----------------------|----------------------------|------------------------|
| AL    | 168146.2728        | 34683.14837           | 161847.8395                | 66630.94021            |
| AR    | 138385.8711        | 25795.44393           | 197253.2868                | 52088.75944            |
| AZ    | 4189951.736        | 808463.4117           | 1667854.673                | 1604554.241            |
| CA    | 9832867.87         | 1904761.316           | 4991633.304                | 3773006.211            |
| CO    | 1119132.741        | 217690.3106           | 1906250.742                | 430325.5314            |
| CT    | 15183.29889        | 3190.866431           | 49490.30048                | 6075.693219            |
| FL    | 5495562.797        | 1141485.394           | 5264828.763                | 2185642.326            |
| GA    | 2618849.25         | 539195.6575           | 2904654.649                | 1036777.015            |
| IA    | 30279.83613        | 6049.742618           | 77870.71346                | 11802.91148            |
| ID    | 287805.1762        | 58567.61732           | 305358.4421                | 113250.6008            |
| IL    | 991065.2073        | 196076.3371           | 1781766.266                | 384378.7265            |
| IN    | 386511.7842        | 77032.364             | 678974.9194                | 150469.603             |
| KS    | 39986.40663        | 8119.165974           | 94813.35585                | 15716.58323            |
| KY    | 671936.6856        | 132689.5143           | 790433.3276                | 260357.4845            |
| LA    | 91054.93404        | 18363.41717           | 280719.6249                | 35663.85464            |
| MA    | 223511.6179        | 46470.4525            | 482799.6549                | 88937.6599             |
| MD    | 525144.9357        | 108319.1152           | 715545.9291                | 208096.653             |
| ME    | 10924.80964        | 2237.617848           | 42942.88959                | 4313.331679            |
| MI    | 522082.0838        | 107054.3497           | 549669.7019                | 206249.9456            |
| MN    | 387879.9394        | 79092.21685           | 665841.3674                | 152789.4053            |
| MO    | 477942.4384        | 94848.1677            | 923258.8702                | 185657.231             |
| MS    | 29193.09572        | 5912.38287            | 57822.79337                | 11459.07106            |
| MT    | 29896.99899        | 6125.302781           | 128358.1259                | 11805.73259            |
| NC    | 2367572.774        | 487340.7179           | 2469009.606                | 937179.5449            |
| ND    | 5359.637324        | 1120.976007           | 16564.75131                | 2139.307098            |
| NE    | 22625.32918        | 4241.721616           | 89404.18972                | 8540.534161            |
| NH    | 9084.21581         | 1892.154919           | 31939.30858                | 3618.155923            |
| NJ    | 329332.0758        | 67304.96745           | 487333.2531                | 129878.0618            |
| NM    | 84023.64916        | 15606.71237           | 200097.0648                | 31571.20571            |
| NV    | 1453948.181        | 285128.4666           | 894159.0761                | 561378.621             |
| NY    | 1105325.76         | 225181.9272           | 1589797.225                | 435193.8216            |
| OH    | 421231.6216        | 84659.44191           | 577458.1014                | 164693.45              |

|       |             |             |             |             |
|-------|-------------|-------------|-------------|-------------|
| OK    | 90474.38392 | 17477.83349 | 210482.5512 | 34667.96643 |
| OR    | 287290.293  | 57692.01566 | 424675.1686 | 112277.1713 |
| PA    | 955958.825  | 195817.4471 | 1023450.556 | 377449.6239 |
| RI    | 33218.95772 | 6807.882149 | 67024.23758 | 13119.48411 |
| SC    | 902554.0225 | 185184.4717 | 755011.0801 | 356669.736  |
| SD    | 56329.96627 | 11457.33541 | 98538.51269 | 22160.029   |
| TN    | 805536.9081 | 157192.7688 | 1204865.767 | 310244.7814 |
| TX    | 4444388.834 | 846438.1564 | 5134003.054 | 1690872.035 |
| UT    | 920550.5197 | 181328.6186 | 765891.8365 | 356233.2173 |
| VA    | 1619673.523 | 331424.5131 | 1713832.216 | 639162.4825 |
| VT    | 4652.495899 | 986.4673226 | 15968.46086 | 1870.441543 |
| WA    | 52345.3774  | 10416.95059 | 100768.6257 | 20362.57229 |
| WI    | 218817.8531 | 44331.51061 | 361516.9508 | 85906.90271 |
| WV    | 9710.556568 | 2030.791075 | 10500.41871 | 3875.796823 |
| WY    | 21092.91863 | 4213.383014 | 9130.132271 | 8221.037554 |
| Total | 44504394.46 | 8847500.544 | 42971411.68 | 17303335.49 |

Table 3 Detailed medium-range flight-level quantitative data for each origin state

| State | CO2 Reduction (kg) | Fuel Cost Saving (\$) | Total Flight Distance (km) | Total Cost Saving (\$) |
|-------|--------------------|-----------------------|----------------------------|------------------------|
| AK    | 13029.9127         | 2420.18599            | 26445.59432                | 4895.869403            |
| AL    | 12385.7938         | 2606.89588            | 59825.7942                 | 4960.196702            |
| AR    | 31847.21453        | 6398.17754            | 62411.66192                | 12449.14831            |
| AZ    | 610839.9084        | 117448.821            | 3206394.898                | 233508.4033            |
| CA    | 4776210.706        | 919490.426            | 11297080.66                | 1826970.46             |
| CO    | 700956.6675        | 142876.708            | 3288854.437                | 276058.4749            |
| CT    | 76825.26381        | 15753.9198            | 211603.8983                | 30350.71996            |
| FL    | 6013781.964        | 1230850.76            | 10551920.14                | 2373469.332            |
| GA    | 362339.548         | 71178.7256            | 1638366.143                | 140023.2397            |
| IA    | 46538.25056        | 9496.17407            | 149812.3127                | 18338.44168            |
| ID    | 5900.957404        | 1164.50144            | 40909.29876                | 2285.683343            |
| IL    | 1674288.454        | 336073.217            | 3965382.467                | 654188.0231            |
| IN    | 205710.3154        | 41600.665             | 441843.7706                | 80685.62493            |
| KS    | 881.0626347        | 187.638072            | 10617.98379                | 355.0399731            |
| KY    | 77102.03417        | 15925.6083            | 297777.0383                | 30574.99483            |
| LA    | 119671.8322        | 22763.1817            | 382970.928                 | 45500.82982            |
| MA    | 300735.2509        | 61018.0931            | 1210896.967                | 118157.7908            |
| MD    | 367793.1617        | 71894.539             | 1115510.969                | 141775.2398            |
| ME    | 25242.91017        | 5271.83057            | 50978.4427                 | 10067.9835             |
| MI    | 769881.0538        | 157732.709            | 1750753.943                | 304010.1093            |
| MN    | 432194.9672        | 86358.9712            | 1545104.361                | 168476.015             |
| MO    | 342343.2444        | 69034.7653            | 772977.9052                | 134079.9817            |
| MT    | 13792.02028        | 2499.53176            | 79628.77544                | 5120.015616            |
| NC    | 230152.4488        | 45425.0481            | 1608809.308                | 89154.01337            |
| ND    | 38802.34341        | 7632.481              | 57132.37281                | 15004.92625            |
| NE    | 34107.50834        | 6631.06117            | 133155.1803                | 13111.48776            |
| NH    | 47361.4662         | 9887.9459             | 80616.4514                 | 18886.62447            |
| NJ    | 904704.9583        | 183073.519            | 2594875.3                  | 354967.4613            |
| NM    | 19375.99677        | 3886.24845            | 91843.36637                | 7567.687835            |
| NV    | 701930.3065        | 132761.08             | 3161807.297                | 266127.8382            |
| NY    | 1425794.577        | 288792.958            | 4733235.829                | 559693.9274            |
| OH    | 338906.7611        | 68593.026             | 954481.8198                | 132985.3106            |
| OK    | 37119.29758        | 7568.85968            | 119511.0743                | 14621.52622            |
| OR    | 175637.7671        | 34882.4916            | 718286.1487                | 68253.66739            |

|       |             |            |             |             |
|-------|-------------|------------|-------------|-------------|
| PA    | 697359.7441 | 141411.385 | 2085238.617 | 273909.7359 |
| PR    | 82544.23968 | 16743.8814 | 370152.8388 | 32427.2869  |
| RI    | 30720.56564 | 6410.78244 | 46286.30062 | 12247.68991 |
| SC    | 34045.61024 | 7074.98506 | 136231.1613 | 13543.651   |
| SD    | 16180.137   | 3263.04303 | 44200.56414 | 6337.269058 |
| TN    | 110005.5205 | 22450.2462 | 696493.2375 | 43351.29507 |
| TX    | 4423062.384 | 841718.866 | 8284300.56  | 1682100.719 |
| UT    | 220600.4678 | 43652.1856 | 1249313.65  | 85566.27451 |
| VA    | 563874.5256 | 109107.782 | 2342380.366 | 216243.9418 |
| VI    | 4909.851747 | 1019.59547 | 44622.33805 | 1952.467303 |
| VT    | 4878.738095 | 1009.82227 | 9832.244605 | 1936.78251  |
| WA    | 778192.5829 | 154560.137 | 2623194.999 | 302416.7274 |
| WI    | 196796.5039 | 39079.7414 | 371682.0701 | 76471.07714 |
| WY    | 3167.931564 | 586.028677 | 11791.04258 | 1187.935674 |
| Total | 28100524.73 | 5567269.24 | 74727542.52 | 10906368.94 |

Table 4 Detailed long-range flight-level quantitative data for each origin state

| <b>State</b> | <b>CO2 Reduction (kg)</b> | <b>Fuel Cost Saving (\$)</b> | <b>Total Flight Distance (km)</b> | <b>Total Cost Saving (\$)</b> |
|--------------|---------------------------|------------------------------|-----------------------------------|-------------------------------|
| AK           | 2488.444018               | 456.7315035                  | 34915.18983                       | 929.535867                    |
| AZ           | 68018.39379               | 13314.95713                  | 252268.6408                       | 26238.45195                   |
| CA           | 240593.6908               | 48109.31062                  | 2029368.281                       | 93822.11186                   |
| CO           | 20303.30596               | 4214.759684                  | 219141.8177                       | 8072.387817                   |
| FL           | 195044.7423               | 40364.99245                  | 662165.4219                       | 77423.49348                   |
| GA           | 4770.048017               | 965.3859836                  | 50570.95872                       | 1871.695107                   |
| HI           | 213726.4253               | 41993.71398                  | 1613437.069                       | 82601.73479                   |
| IL           | 4071.745415               | 856.8027279                  | 101319.5417                       | 1630.434357                   |
| MA           | 128346.3209               | 25154.61687                  | 965075.4017                       | 49540.41784                   |
| MI           | 10592.81331               | 2192.430699                  | 50209.4714                        | 4205.065228                   |
| MN           | 4849.152223               | 976.7405839                  | 44620.21629                       | 1898.079506                   |
| NJ           | 51874.39547               | 10693.95519                  | 432805.9826                       | 20550.09033                   |
| NV           | 49916.48493               | 9263.819867                  | 305057.1058                       | 18747.952                     |
| NY           | 77087.39411               | 15903.34471                  | 652807.0702                       | 30549.94959                   |
| OR           | 17100.01996               | 3544.467927                  | 126087.481                        | 6793.471719                   |
| PA           | 22943.44323               | 4730.920073                  | 132803.275                        | 9090.174287                   |
| PR           | 7731.834638               | 1596.936058                  | 30747.0198                        | 3065.984639                   |
| TX           | 39026.06583               | 7563.606892                  | 206019.5158                       | 14978.5594                    |
| UT           | 5530.220758               | 1157.494972                  | 129176.6583                       | 2208.236916                   |
| VA           | 5739.744481               | 1175.893618                  | 46281.83359                       | 2266.445069                   |
| WA           | 129093.9036               | 26964.65329                  | 432622.8312                       | 51492.49496                   |
| <b>Total</b> | <b>1298848.589</b>        | <b>261195.5348</b>           | <b>8517500.783</b>                | <b>507976.7667</b>            |

Table 5 Detailed short-range flight-level quantitative data for each destination state

| State | CO2 Reduction (kg) | Fuel Cost Saving (\$) | Total Flight Distance (km) | Total Cost Saving (\$) |
|-------|--------------------|-----------------------|----------------------------|------------------------|
| AL    | 165791.2486        | 34198.59216           | 159032.4673                | 65698.9294             |
| AR    | 137581.5049        | 25657.03196           | 200032.9798                | 51797.5179             |
| AZ    | 4260289.625        | 821729.4809           | 1658866.678                | 1631184.51             |
| CA    | 9899450.39         | 1918945.137           | 5013493.331                | 3799840.711            |
| CO    | 1134053.146        | 220849.3605           | 1905491.815                | 436319.4582            |
| CT    | 13707.90202        | 2878.874464           | 49526.29996                | 5483.375849            |
| FL    | 5496295.757        | 1141697.217           | 5279980.894                | 2185993.411            |
| GA    | 2722214.825        | 560934.9882           | 2868443.919                | 1078155.805            |
| IA    | 44631.62343        | 8919.993571           | 94530.25084                | 17400.00202            |
| ID    | 250885.076         | 51077.09327           | 300901.0323                | 98745.2577             |
| IL    | 1164118.272        | 230157.1075           | 1812281.798                | 451339.5792            |
| IN    | 397101.1297        | 79159.62369           | 682786.8474                | 154608.8383            |
| KS    | 35135.07522        | 7103.966017           | 94725.27169                | 13779.63031            |
| KY    | 664727.8426        | 131788.9374           | 794502.4002                | 258087.2275            |
| LA    | 88117.98668        | 17746.63602           | 281816.17                  | 34489.05349            |
| MA    | 187795.3465        | 39034.28468           | 479190.3355                | 74715.40052            |
| MD    | 492167.667         | 101426.7178           | 712987.028                 | 194938.5746            |
| ME    | 7855.292871        | 1610.813737           | 41501.98382                | 3103.319383            |
| MI    | 526027.9848        | 107770.1432           | 556572.8204                | 207715.4603            |
| MN    | 392931.5477        | 79954.94895           | 655201.0464                | 154611.943             |
| MO    | 516460.5794        | 102431.0885           | 923744.7689                | 200558.5986            |
| MS    | 28404.42108        | 5757.486455           | 58388.31092                | 11154.32646            |
| MT    | 27834.01855        | 5671.578271           | 127654.384                 | 10960.0418             |
| NC    | 2385363.595        | 491826.6205           | 2465784.119                | 945045.7036            |
| ND    | 5326.98744         | 1113.920083           | 16564.75131                | 2126.047696            |
| NE    | 24522.13728        | 4571.2616             | 90724.11007                | 9230.467683            |
| NH    | 10886.564          | 2239.426709           | 27767.16933                | 4307.87387             |
| NJ    | 301421.8257        | 61564.52501           | 473286.2652                | 118834.6719            |
| NM    | 88204.96042        | 16333.30884           | 203201.701                 | 33092.25132            |
| NV    | 1460393.173        | 286102.7105           | 888272.7836                | 563577.4134            |
| NY    | 951084.5991        | 193756.5857           | 1583537.323                | 374462.6596            |
| OH    | 410205.8206        | 82522.75372           | 574329.7229                | 160461.8596            |
| OK    | 83833.29321        | 16142.38835           | 204478.295                 | 32070.71406            |
| OR    | 285714.8774        | 57403.99698           | 424492.5891                | 111689.8237            |

|       |             |             |             |             |
|-------|-------------|-------------|-------------|-------------|
| PA    | 886836.763  | 181698.661  | 1023182.454 | 350197.646  |
| RI    | 29053.93581 | 5964.524232 | 67376.04555 | 11484.77204 |
| SC    | 943469.0317 | 193677.9229 | 753769.477  | 372937.0389 |
| SD    | 53557.46415 | 10903.9579  | 99278.86642 | 21079.87609 |
| TN    | 804285.8521 | 157949.9409 | 1208295.626 | 310764.2528 |
| TX    | 4492193.97  | 855983.6998 | 5156527.198 | 1709500.554 |
| UT    | 879545.7007 | 173122.6411 | 761646.8995 | 340236.3242 |
| VA    | 1451977.89  | 296970.3121 | 1691581.191 | 572846.1112 |
| VT    | 5356.606713 | 1135.98937  | 17196.80401 | 2153.744646 |
| WA    | 56340.22691 | 11226.95411 | 100768.6257 | 21931.59723 |
| WI    | 215290.0398 | 43515.29145 | 368066.2842 | 84420.39902 |
| WV    | 9547.429747 | 1996.802981 | 10500.41871 | 3810.814633 |
| WY    | 16403.45864 | 3275.246375 | 9130.132271 | 6391.903517 |
| Total | 44504394.46 | 8847500.544 | 42971411.68 | 17303335.49 |

Table 6 Detailed medium-range flight-level quantitative data for each destination state

| State | CO2 Reduction (kg) | Fuel Cost Saving (\$) | Total Flight Distance (km) | Total Cost Saving (\$) |
|-------|--------------------|-----------------------|----------------------------|------------------------|
| AK    | 14458.00423        | 2673.87397            | 26445.59432                | 5420.894771            |
| AL    | 11303.86686        | 2380.07               | 59825.7942                 | 4527.804702            |
| AR    | 37649.95512        | 7553.00341            | 60676.16231                | 14706.49488            |
| AZ    | 661563.9886        | 127029.893            | 3194896.047                | 252727.0506            |
| CA    | 5117099.05         | 984888.216            | 11247249.92                | 1957137.036            |
| CO    | 776607.1567        | 158040.447            | 3304091.978                | 305595.8065            |
| CT    | 65392.31863        | 13408.445             | 209907.6008                | 25832.98557            |
| FL    | 5795978.176        | 1187418.71            | 10524056.93                | 2288654.565            |
| GA    | 330272.6229        | 64855.7944            | 1641494.185                | 127607.5927            |
| IA    | 53827.65233        | 10999.0896            | 179359.2456                | 21226.34355            |
| ID    | 7038.825836        | 1378.12381            | 40909.29876                | 2715.500721            |
| IL    | 1792666.587        | 360970.516            | 3946551.139                | 701577.1679            |
| IN    | 202460.7212        | 41214.3851            | 433275.7513                | 79681.9221             |
| KS    | 755.8521301        | 160.971435            | 8848.319821                | 304.5833397            |
| KY    | 78610.59499        | 16281.8658            | 302071.0267                | 31217.8789             |
| LA    | 104962.9745        | 19989.3352            | 400858.0324                | 39932.30035            |
| MA    | 259281.7582        | 52558.1021            | 1194569.631                | 101821.6362            |
| MD    | 339133.7864        | 66383.9076            | 1141999.745                | 130819.327             |
| ME    | 21760.07617        | 4546.1687             | 53290.94992                | 8680.583173            |
| MI    | 756646.3691        | 155047.177            | 1769184.017                | 298809.9873            |
| MN    | 454295.72          | 90964.627             | 1555316.413                | 177280.8138            |
| MO    | 366105.2545        | 74075.614             | 774883.2157                | 143635.6124            |
| MT    | 15500.87576        | 2812.72703            | 79628.77544                | 5757.893426            |
| NC    | 207237.4961        | 40971.3336            | 1625669.454                | 80346.45783            |
| ND    | 41061.85647        | 8102.24612            | 57132.37281                | 15903.99885            |
| NE    | 34303.9937         | 6685.53876            | 133155.1803                | 13203.29756            |
| NH    | 35854.06818        | 7486.8089             | 78769.79208                | 14299.08186            |
| NJ    | 823445.2441        | 166814.229            | 2588062.323                | 323268.8251            |
| NM    | 17692.82508        | 3556.06544            | 95420.90005                | 6917.702207            |
| NV    | 788713.7683        | 149238.563            | 3129358.163                | 299094.1789            |
| NY    | 1282302.36         | 259797.489            | 4774410.427                | 503434.9374            |
| OH    | 332477.067         | 67432.6               | 952560.2831                | 130603.2428            |
| OK    | 45658.26528        | 9312.50571            | 119261.3394                | 17987.57612            |
| OR    | 199294.3633        | 39514.6915            | 717246.0747                | 77380.62052            |

|       |             |            |             |             |
|-------|-------------|------------|-------------|-------------|
| PA    | 636269.4818 | 129136.891 | 2084384.098 | 250028.0927 |
| PR    | 71923.55804 | 14597.0514 | 366552.7214 | 28262.52742 |
| RI    | 27285.00771 | 5694.22351 | 46286.30062 | 10878.37497 |
| SC    | 29936.25716 | 6224.57337 | 134941.8033 | 11912.46223 |
| SD    | 18183.61381 | 3668.11622 | 45737.13711 | 7123.002841 |
| TN    | 103057.7167 | 21078.8212 | 684038.2314 | 40659.78737 |
| TX    | 4341918.694 | 827475.311 | 8295408.762 | 1652439.863 |
| UT    | 254337.664  | 50456.6465 | 1260447.808 | 98780.80266 |
| VA    | 503627.754  | 97391.7208 | 2343735.943 | 193080.994  |
| VI    | 4829.245089 | 985.844408 | 47062.68486 | 1903.400975 |
| VT    | 4700.934331 | 972.582465 | 9832.244605 | 1865.759988 |
| WA    | 819994.8766 | 162863.803 | 2600333.353 | 318662.8296 |
| WI    | 209586.6412 | 41535.3023 | 376554.3182 | 81356.76414 |
| WY    | 3459.78923  | 645.220209 | 11791.04258 | 1302.580163 |
| Total | 28100524.73 | 5567269.24 | 74727542.52 | 10906368.94 |

Table 7 Detailed long-range flight-level quantitative data for each destination state

| <b>State</b> | <b>CO2 Reduction (kg)</b> | <b>Fuel Cost Saving (\$)</b> | <b>Total Flight Distance (km)</b> | <b>Total Cost Saving (\$)</b> |
|--------------|---------------------------|------------------------------|-----------------------------------|-------------------------------|
| AK           | 2658.278412               | 474.813415                   | 34915.18983                       | 979.8863134                   |
| AZ           | 72264.01353               | 14159.65942                  | 266368.8147                       | 27889.82199                   |
| CA           | 282698.0575               | 56632.00917                  | 2037595.184                       | 110344.6401                   |
| CO           | 20983.28511               | 4354.560254                  | 224616.1459                       | 8341.384425                   |
| FL           | 162054.344                | 33526.09583                  | 662165.4219                       | 64316.42119                   |
| GA           | 4963.295445               | 1005.660571                  | 50570.95872                       | 1948.686705                   |
| HI           | 218494.8554               | 42975.82029                  | 1588355.206                       | 84489.84281                   |
| IL           | 3738.542858               | 786.909139                   | 101319.5417                       | 1497.232282                   |
| MA           | 112544.0561               | 22001.34148                  | 965075.4017                       | 43384.71214                   |
| MI           | 9519.596081               | 1971.936616                  | 50209.4714                        | 3780.659872                   |
| MN           | 4259.423837               | 857.9520805                  | 44620.21629                       | 1667.242609                   |
| NJ           | 43568.73606               | 8981.05893                   | 428709.1339                       | 17259.11878                   |
| NV           | 48356.78469               | 8958.964393                  | 313835.6348                       | 18146.75348                   |
| NY           | 61253.73738               | 12637.43599                  | 640693.4477                       | 24275.64609                   |
| OR           | 20835.83581               | 4321.983864                  | 126087.481                        | 8280.792668                   |
| PA           | 20471.70767               | 4220.057673                  | 132803.275                        | 8109.68213                    |
| PR           | 6680.341719               | 1380.58667                   | 30747.0198                        | 2649.851597                   |
| TX           | 35898.49014               | 6962.311785                  | 206019.5158                       | 13783.02491                   |
| UT           | 5578.712307               | 1168.066594                  | 133889.0584                       | 2228.021932                   |
| VA           | 5279.592992               | 1073.802625                  | 46281.83359                       | 2076.925294                   |
| WA           | 156746.9019               | 32744.50804                  | 432622.8312                       | 62526.4194                    |
| <b>Total</b> | <b>1298848.589</b>        | <b>261195.5348</b>           | <b>8517500.783</b>                | <b>507976.7667</b>            |

# Supplementary materials for flight schedule optimization

Table 8 Optimized farm-level quantitative data for each state

| State | CO2 Reduction (kg) | Fuel Cost Saving (\$) | Total Capacity (MW) | Total Cost Saving (\$) |
|-------|--------------------|-----------------------|---------------------|------------------------|
| AL    | 590888.8987        | 119730.385            | 256.76986           | 218703.9478            |
| AR    | 958284.9953        | 190233.856            | 404.61088           | 340360.82              |
| AZ    | 3341398.39         | 651905.8682           | 1645.53446          | 1161499.967            |
| CA    | 20210641.5         | 3886158.717           | 6431.68858          | 6569700.657            |
| CO    | 1813628.458        | 356524.0727           | 697.46016           | 602120.1737            |
| FL    | 10012124.05        | 2101133.314           | 1695.06584          | 3561907.125            |
| GA    | 4620450.936        | 947334.7055           | 1402.273            | 1611759.67             |
| IA    | 511118.6428        | 105630.2619           | 125.00532           | 184169.6008            |
| ID    | 130747.654         | 26618.22557           | 157.20628           | 49481.0134             |
| IL    | 1322906.652        | 268762.7412           | 387.46052           | 469099.3935            |
| IN    | 1771079.128        | 316538.8521           | 521.15204           | 562036.4036            |
| LA    | 83914.63349        | 16204.84833           | 87.02766            | 31096.58428            |
| MI    | 1207171.772        | 250516.2177           | 247.55984           | 413829.381             |
| MN    | 49860.72881        | 9937.363886           | 62.25778            | 19349.22473            |
| MS    | 578662.8211        | 120139.5068           | 198.93006           | 214957.5413            |
| MT    | 39998.3834         | 8424.058678           | 67.30136            | 15593.70571            |
| NC    | 5605825.058        | 1171097.436           | 723.1281            | 1946326.21             |
| NM    | 939428.4715        | 189003.2949           | 463.5394            | 341010.7314            |
| NV    | 3927545.089        | 768361.3328           | 1923.84938          | 1360709.272            |
| OH    | 2984329.539        | 583587.6031           | 772.44572           | 987871.9668            |
| OK    | 51648.1439         | 10702.98494           | 42.3656             | 20128.31903            |
| OR    | 31141.25868        | 6043.283976           | 86.8029             | 11885.96101            |
| PA    | 749436.3365        | 158812.8572           | 59.97754            | 247403.1858            |
| SC    | 2698151.333        | 566794.8983           | 438.37744           | 960357.2511            |
| SD    | 125451.2954        | 26161.79435           | 92.6355             | 47573.36403            |
| TN    | 711072.6325        | 145903.889            | 146.68454           | 247486.894             |
| TX    | 9578100.281        | 1764791.789           | 7530.43948          | 3270136.697            |
| UT    | 1680087.431        | 347005.5675           | 988.9374            | 636323.6136            |
| VA    | 6262096.466        | 1274196.735           | 930.11296           | 2077397.77             |
| WA    | 23795.60128        | 4578.728061           | 89.545              | 8991.048357            |
| WI    | 1137555.232        | 232179.5868           | 582.71876           | 424481.2613            |
| WY    | 309311.207         | 62853.31246           | 94.46618            | 111498.2897            |
| Total | 84057853.02        | 16687868.09           | 29353.32954         | 32658860.16            |

Table 9 Optimized short-range flight-level quantitative data for each origin state

| State | CO2 Reduction (kg) | Fuel Cost Saving (\$) | Total Flight Distance (km) | Total Cost Saving (\$) |
|-------|--------------------|-----------------------|----------------------------|------------------------|
| AL    | 180742.2978        | 37292.9092            | 162786.2969                | 71633.94579            |
| AR    | 161199.3612        | 29396.69452           | 197857.2492                | 60024.57315            |
| AZ    | 4801321.44         | 924877.3379           | 1673223.507                | 1837128.412            |
| CA    | 11577648.85        | 2243854.031           | 5030501.057                | 4443607.312            |
| CO    | 1253723.205        | 243967.8993           | 1920389.353                | 482175.3082            |
| CT    | 18372.60887        | 3861.421328           | 52927.85756                | 7352.217013            |
| FL    | 6269104.549        | 1302881.855           | 5285335.471                | 2494011.719            |
| GA    | 2965195.29         | 610544.437            | 2959880.78                 | 1173931.542            |
| IA    | 34309.63821        | 6863.486412           | 79575.98994                | 13382.31767            |
| ID    | 305785.5764        | 62251.63872           | 307472.5089                | 120350.8982            |
| IL    | 1154937.783        | 228067.4418           | 1875720.425                | 447505.6206            |
| IN    | 456206.5867        | 90783.29006           | 682276.176                 | 177462.5415            |
| KS    | 46650.45775        | 9515.132094           | 94813.35585                | 18378.71907            |
| KY    | 778747.1263        | 153801.355            | 800029.1204                | 301763.309             |
| LA    | 99638.16323        | 20094.99153           | 287366.5047                | 39026.24254            |
| MA    | 256721.1158        | 53417.45027           | 482799.6548                | 102194.4623            |
| MD    | 612038.3985        | 126234.1227           | 722123.7532                | 242521.4184            |
| ME    | 13328.08753        | 2732.458246           | 44251.08849                | 5264.794877            |
| MI    | 583654.2038        | 119615.7124           | 570815.2138                | 230510.0111            |
| MN    | 413540.1144        | 84364.38912           | 670854.906                 | 162937.0109            |
| MO    | 536466.2289        | 106375.3642           | 925951.7876                | 208303.9477            |
| MS    | 30816.69727        | 6240.713141           | 57822.79337                | 12095.88562            |
| MT    | 31265.5352         | 6369.152201           | 128358.1259                | 12309.60389            |
| NC    | 2682458.365        | 551925.1311           | 2551423.254                | 1061592.22             |
| ND    | 5544.736254        | 1160.170473           | 16564.75131                | 2213.670361            |
| NE    | 26539.51037        | 4927.19071            | 91483.12788                | 9969.697679            |
| NH    | 13481.14421        | 2777.908294           | 31939.30858                | 5339.325695            |
| NJ    | 388800.1654        | 79553.94946           | 511530.2313                | 153425.9809            |
| NM    | 87740.03639        | 16257.84705           | 206306.3373                | 32928.45396            |
| NV    | 1653983.315        | 324650.6047           | 911222.6398                | 638907.4345            |
| NY    | 1328150.225        | 270680.6716           | 1682111.708                | 523029.2144            |
| OH    | 484246.6322        | 97587.27602           | 580245.7493                | 189594.1361            |
| OK    | 112860.081         | 21960.53212           | 245647.7943                | 43403.94751            |
| OR    | 312147.0289        | 62704.17238           | 425695.5764                | 122012.1079            |

|       |             |             |             |             |
|-------|-------------|-------------|-------------|-------------|
| PA    | 1110831.15  | 227620.1236 | 1029604.401 | 438678.0421 |
| RI    | 38296.73591 | 7838.299406 | 67024.23758 | 15114.67923 |
| SC    | 1041947.972 | 213411.9079 | 757991.5972 | 411382.0225 |
| SD    | 58535.92923 | 11918.80134 | 98538.51269 | 23040.6279  |
| TN    | 888352.1354 | 172953.0076 | 1235518.748 | 341739.9133 |
| TX    | 4914407.65  | 935474.8403 | 5172963.998 | 1869212.294 |
| UT    | 971124.7021 | 191134.4672 | 776717.3338 | 375648.1606 |
| VA    | 1877139.281 | 383860.4831 | 1745531.868 | 740516.9464 |
| VT    | 5989.796789 | 1270.324509 | 15968.46086 | 2408.385898 |
| WA    | 58000.71214 | 11545.73176 | 100768.6257 | 22565.86706 |
| WI    | 234186.7488 | 47246.59777 | 365530.8582 | 91742.08005 |
| WV    | 11380.16721 | 2378.889489 | 10500.41871 | 4541.121259 |
| WY    | 21553.4504  | 4306.405269 | 9130.132271 | 8401.560844 |
| Total | 50909110.99 | 10118548.62 | 43653092.65 | 19791279.7  |

Table 10 Optimized medium-range flight-level quantitative data for each origin state

| State | CO2 Reduction (kg) | Fuel Cost Saving (\$) | Total Flight Distance (km) | Total Cost Saving (\$) |
|-------|--------------------|-----------------------|----------------------------|------------------------|
| AK    | 14823.93633        | 2747.870696           | 26445.59432                | 5564.418598            |
| AL    | 15437.4528         | 3252.902729           | 59825.7942                 | 6186.018762            |
| AR    | 37013.84336        | 7436.100025           | 62411.66192                | 14468.73026            |
| AZ    | 660053.1393        | 127026.0828           | 3212901.446                | 252436.1793            |
| CA    | 5357094.918        | 1030411.815           | 11374653.69                | 2048259.849            |
| CO    | 776276.3062        | 157786.6416           | 3422065.188                | 305279.1398            |
| CT    | 90132.26639        | 18499.0134            | 211603.8983                | 35624.14402            |
| FL    | 6811622.881        | 1394708.202           | 10669171.15                | 2688916.549            |
| GA    | 402997.2173        | 79212.20259           | 1696882.63                 | 155781.6739            |
| IA    | 50775.73602        | 10377.16413           | 153106.2117                | 20024.55398            |
| ID    | 6606.870445        | 1284.186288           | 40909.29876                | 2539.491673            |
| IL    | 1901233.333        | 381354.8527           | 3984278.237                | 742589.1859            |
| IN    | 227488.0185        | 46030.16397           | 441843.7706                | 89252.88749            |
| KS    | 881.0625629        | 187.6379857           | 10617.98379                | 355.0398727            |
| KY    | 88643.08722        | 18326.24983           | 304597.1035                | 35168.4364             |
| LA    | 132353.8231        | 25155.90682           | 416677.9449                | 50303.13321            |
| MA    | 351187.0731        | 71267.60311           | 1263435.877                | 137993.147             |
| MD    | 420677.3742        | 82125.6213            | 1125835.8                  | 162054.3224            |
| ME    | 28094.10898        | 5868.466281           | 50978.4427                 | 11206.34699            |
| MI    | 884756.5643        | 181267.961            | 1773826.538                | 349371.7082            |
| MN    | 485010.3513        | 96951.66416           | 1557848.092                | 189103.6309            |
| MO    | 378521.8484        | 76340.88375           | 786530.3887                | 148260.0349            |
| MT    | 14904.9159         | 2706.608689           | 79628.77544                | 5538.542709            |
| NC    | 254188.5685        | 49957.10283           | 1655582.154                | 98252.93085            |
| ND    | 40344.44881        | 7941.611742           | 57132.37281                | 15607.05702            |
| NE    | 36220.46677        | 7051.03674            | 133155.1803                | 13932.92543            |
| NH    | 52692.63011        | 11003.86352           | 80616.4514                 | 21015.46324            |
| NJ    | 1039315.423        | 210445.4873           | 2626028.975                | 407915.4176            |
| NM    | 20284.80962        | 4074.640878           | 93632.13321                | 7928.754706            |
| NV    | 770176.6811        | 145923.1242           | 3215570.85                 | 292256.6936            |
| NY    | 1676913.695        | 339542.283            | 4874553.398                | 658155.8851            |
| OH    | 386556.4577        | 78199.62421           | 954481.8198                | 151645.3512            |
| OK    | 44689.09356        | 9092.722779           | 125570.723                 | 17583.65056            |
| OR    | 189894.6508        | 37647.21444           | 718286.1487                | 73727.19809            |

|       |             |             |             |             |
|-------|-------------|-------------|-------------|-------------|
| PA    | 799535.1146 | 162061.6674 | 2106826.828 | 313973.3392 |
| PR    | 90911.0275  | 18399.15139 | 370152.8388 | 35672.24662 |
| RI    | 35774.02049 | 7467.453925 | 46286.30062 | 14264.51782 |
| SC    | 39419.16936 | 8202.111602 | 144412.4817 | 15691.75378 |
| SD    | 17074.8701  | 3446.61857  | 44200.56414 | 6690.843888 |
| TN    | 121678.1929 | 24892.53977 | 718039.9013 | 48011.39642 |
| TX    | 4974249.634 | 945125.0501 | 8369909.647 | 1890232.481 |
| UT    | 240028.0554 | 47452.13252 | 1257184.521 | 93057.46305 |
| VA    | 648009.791  | 124595.5315 | 2349200.006 | 247717.3918 |
| VI    | 5892.486979 | 1183.613322 | 44622.33805 | 2303.185848 |
| VT    | 6272.587022 | 1301.027596 | 9832.244605 | 2492.81913  |
| WA    | 850615.7853 | 168943.402  | 2639558.358 | 330560.4012 |
| WI    | 225543.6216 | 44671.62135 | 371682.0701 | 87524.90945 |
| WY    | 3256.389156 | 601.0626928 | 11791.04258 | 1219.776632 |
| Total | 31706123.8  | 6279547.496 | 75744384.87 | 12303711.02 |

Table 11 Optimized long-range flight-level quantitative data for each origin state

| <b>State</b> | <b>CO2 Reduction (kg)</b> | <b>Fuel Cost Saving (\$)</b> | <b>Total Flight Distance (km)</b> | <b>Total Cost Saving (\$)</b> |
|--------------|---------------------------|------------------------------|-----------------------------------|-------------------------------|
| AK           | 2735.995545               | 496.6881169                  | 34915.18983                       | 1016.52727                    |
| AZ           | 87072.86846               | 17047.09443                  | 261668.7567                       | 33590.93943                   |
| CA           | 276056.7879               | 55148.08847                  | 2029368.281                       | 107598.8782                   |
| CO           | 21493.90241               | 4466.940521                  | 219141.8177                       | 8550.781978                   |
| FL           | 206366.5021               | 42698.07976                  | 662165.4219                       | 81907.71516                   |
| GA           | 5325.427435               | 1077.73341                   | 50570.95872                       | 2089.564623                   |
| HI           | 229209.8621               | 45000.32607                  | 1618137.127                       | 88550.19987                   |
| IL           | 4170.838793               | 877.8279864                  | 101319.5417                       | 1670.287357                   |
| MA           | 148764.5721               | 29068.44513                  | 965075.4017                       | 57333.71383                   |
| MI           | 11018.02329               | 2282.79107                   | 50209.4714                        | 4376.215496                   |
| MN           | 4849.152223               | 976.7405839                  | 44620.21629                       | 1898.079506                   |
| NJ           | 59545.19674               | 12284.22141                  | 432805.9826                       | 23597.8088                    |
| NV           | 54503.11118               | 10089.51408                  | 305057.1058                       | 20445.10521                   |
| NY           | 88691.08435               | 18309.54496                  | 652807.0702                       | 35160.85098                   |
| OR           | 18218.39567               | 3780.272162                  | 126087.481                        | 7241.76734                    |
| PA           | 25811.1904                | 5318.204739                  | 132803.275                        | 10222.33092                   |
| PR           | 8753.733998               | 1812.590488                  | 30747.0198                        | 3475.799947                   |
| TX           | 42180.61917               | 8178.44352                   | 206019.5158                       | 16192.76116                   |
| UT           | 5983.138069               | 1252.750315                  | 129176.6583                       | 2389.546548                   |
| VA           | 6365.148458               | 1293.197961                  | 46281.83359                       | 2502.576168                   |
| WA           | 135502.6851               | 28312.48021                  | 432622.8312                       | 54057.99038                   |
| <b>Total</b> | <b>1442618.236</b>        | <b>289771.9754</b>           | <b>8531600.957</b>                | <b>563869.4401</b>            |

Table 12 Optimized short-range flight-level quantitative data for each destination state

| State | CO2 Reduction (kg) | Fuel Cost Saving (\$) | Total Flight Distance (km) | Total Cost Saving (\$) |
|-------|--------------------|-----------------------|----------------------------|------------------------|
| AL    | 180047.9655        | 37131.19161           | 161847.8395                | 71340.30505            |
| AR    | 159368.4199        | 29179.13951           | 200636.9422                | 59459.13928            |
| AZ    | 4898849.73         | 943551.0425           | 1668518.313                | 1874332.491            |
| CA    | 11621242.57        | 2253436.597           | 5048532.445                | 4461472.686            |
| CO    | 1281503.556        | 249474.0111           | 1915010.801                | 492959.6868            |
| CT    | 16662.78057        | 3500.933894           | 54000.7069                 | 6666.862202            |
| FL    | 6247612.822        | 1298324.548           | 5292775.452                | 2485370.984            |
| GA    | 3112066.2          | 641116.1841           | 2933792.069                | 1232408.762            |
| IA    | 49197.38479        | 9805.849084           | 99137.58858                | 19153.35219            |
| ID    | 279221.9846        | 56842.94874           | 303426.4099                | 109895.1258            |
| IL    | 1330005.59         | 262319.5438           | 1883206.346                | 515020.6058            |
| IN    | 477505.8115        | 95226.52201           | 688660.5646                | 185952.6262            |
| KS    | 42734.40868        | 8684.863485           | 95193.52207                | 16804.40113            |
| KY    | 770498.6969        | 152796.0039           | 801305.5974                | 299190.7563            |
| LA    | 96027.59313        | 19365.14696           | 286551.8488                | 37610.38965            |
| MA    | 217582.5464        | 45271.59877           | 484088.671                 | 86612.28259            |
| MD    | 569028.7324        | 117343.1915           | 721183.838                 | 225458.6506            |
| ME    | 10692.96287        | 2191.102139           | 45691.99426                | 4222.765085            |
| MI    | 571477.592         | 117061.1039           | 565925.0395                | 225641.8463            |
| MN    | 421584.0405        | 85869.26512           | 659259.2543                | 165970.2328            |
| MO    | 584842.6534        | 115899.2641           | 926942.647                 | 227019.3682            |
| MS    | 29157.23702        | 5913.645764           | 58388.31092                | 11453.5208             |
| MT    | 29838.78359        | 6074.015653           | 127654.384                 | 11743.38453            |
| NC    | 2726609.012        | 561826.577            | 2560587.131                | 1079882.289            |
| ND    | 5719.116389        | 1195.941303           | 16564.75131                | 2282.573417            |
| NE    | 28404.28844        | 5286.249952           | 93842.51731                | 10683.06475            |
| NH    | 12556.22994        | 2583.018378           | 31786.80623                | 4968.702066            |
| NJ    | 355819.7215        | 72775.86569           | 507351.6515                | 140381.6128            |
| NM    | 90175.33867        | 16662.18063           | 205530.1782                | 33795.49498            |
| NV    | 1648771.092        | 323331.5799           | 909163.0587                | 636598.0874            |
| NY    | 1129334.219        | 230187.4612           | 1672868.464                | 444760.9628            |
| OH    | 468251.0184        | 94364.6374            | 578241.4294                | 183332.3309            |
| OK    | 104732.022         | 20256.8075            | 243643.9975                | 40155.89168            |
| OR    | 322133.468         | 64706.6295            | 425512.9969                | 125911.9884            |

|       |             |             |             |             |
|-------|-------------|-------------|-------------|-------------|
| PA    | 1035260.16  | 212206.7613 | 1030366.278 | 408906.1917 |
| RI    | 33159.12638 | 6782.46489  | 67376.04555 | 13082.6989  |
| SC    | 1094993.895 | 224492.0282 | 757468.3798 | 432540.8682 |
| SD    | 57664.62492 | 11694.93224 | 99278.86642 | 22651.21098 |
| TN    | 887953.8447 | 173628.4682 | 1229749.784 | 342339.6987 |
| TX    | 4946023.318 | 942098.9912 | 5188290.674 | 1881843.422 |
| UT    | 928155.1031 | 182586.5638 | 772692.4878 | 358936.0334 |
| VA    | 1710136.371 | 349705.1687 | 1733223.119 | 674631.0792 |
| VT    | 5982.701822 | 1268.992887 | 17196.80401 | 2405.706233 |
| WA    | 60578.44801 | 12071.48236 | 100768.6257 | 23581.38748 |
| WI    | 231687.8318 | 46709.75139 | 370227.4643 | 90730.43943 |
| WV    | 10888.18095 | 2277.587837 | 10500.41871 | 4346.342218 |
| WY    | 17371.78772 | 3470.762221 | 9130.132271 | 6771.401888 |
| Total | 50909110.99 | 10118548.62 | 43653092.65 | 19791279.7  |

Table 13 Optimized medium-range flight-level quantitative data for each destination state

| State | CO2 Reduction (kg) | Fuel Cost Saving (\$) | Total Flight Distance (km) | Total Cost Saving (\$) |
|-------|--------------------|-----------------------|----------------------------|------------------------|
| AK    | 15192.92548        | 2815.651991           | 26445.59432                | 5702.307832            |
| AL    | 13009.96898        | 2741.009642           | 59825.7942                 | 5212.903747            |
| AR    | 44262.44252        | 8893.142559           | 62411.66192                | 17303.00664            |
| AZ    | 727445.7405        | 139860.8118           | 3201753.528                | 278075.5025            |
| CA    | 5773702.105        | 1110436.223           | 11339823.98                | 2207439.623            |
| CO    | 879959.3496        | 178638.5139           | 3430065.016                | 345830.7903            |
| CT    | 78259.15424        | 16066.06732           | 209907.6008                | 30935.30663            |
| FL    | 6577910.94         | 1348491.16            | 10638090.76                | 2598294.239            |
| GA    | 358042.0687        | 70246.2051            | 1692708.331                | 138274.1982            |
| IA    | 58808.91956        | 12029.13399           | 181006.1951                | 23202.82871            |
| ID    | 7382.334236        | 1434.934609           | 40909.29876                | 2837.578114            |
| IL    | 2040627.969        | 410482.9667           | 3976813.934                | 798202.2808            |
| IN    | 225356.4011        | 45816.31991           | 436375.6233                | 88634.03612            |
| KS    | 1005.1235          | 214.0589514           | 10617.98379                | 405.0324164            |
| KY    | 84406.73374        | 17479.40474           | 307186.0756                | 33516.68415            |
| LA    | 118412.224         | 22501.93193           | 421332.0559                | 45000.2545             |
| MA    | 298254.9551        | 60493.83801           | 1229694.126                | 117162.2795            |
| MD    | 381586.3927        | 74618.87567           | 1144396.931                | 147120.2903            |
| ME    | 24686.04294        | 5158.447632           | 53290.94992                | 9848.795791            |
| MI    | 866515.3049        | 177592.6949           | 1776114.788                | 342230.6029            |
| MN    | 506073.6559        | 101397.5788           | 1570660.567                | 197551.5734            |
| MO    | 407254.7797        | 82383.26791           | 782755.5676                | 159761.676             |
| MT    | 17084.00439        | 3093.295913           | 79628.77544                | 6339.256747            |
| NC    | 224288.0572        | 44127.12389           | 1672876.726                | 86741.85476            |
| ND    | 43089.19406        | 8505.660726           | 57132.37281                | 16692.6076             |
| NE    | 36647.18187        | 7153.887431           | 133155.1803                | 14116.85199            |
| NH    | 42115.49471        | 8796.456418           | 78769.79208                | 16798.40041            |
| NJ    | 943667.667         | 191229.4521           | 2620940.484                | 370526.3089            |
| NM    | 19389.93263        | 3907.661169           | 97209.66689                | 7591.748369            |
| NV    | 869552.4322        | 164790.5157           | 3215995.813                | 330005.4778            |
| NY    | 1491868.643        | 302259.1105           | 4888325.646                | 585714.1527            |
| OH    | 376834.1221        | 76446.92654           | 957862.0071                | 148045.4097            |
| OK    | 51428.13343        | 10473.7274            | 125239.0456                | 20245.07275            |
| OR    | 209738.3455        | 41521.94883           | 717246.0747                | 81372.23448            |

|       |             |             |             |             |
|-------|-------------|-------------|-------------|-------------|
| PA    | 727920.886  | 147625.3376 | 2108530.479 | 285930.3059 |
| PR    | 79036.48762 | 15997.25728 | 366552.7214 | 31014.18993 |
| RI    | 30124.0711  | 6288.010592 | 46286.30062 | 12011.5841  |
| SC    | 33109.02498 | 6888.098216 | 145974.2084 | 13178.81296 |
| SD    | 19806.18443 | 3999.012094 | 45737.13711 | 7762.187135 |
| TN    | 114120.1641 | 23398.14061 | 705375.3883 | 45080.97179 |
| TX    | 4886625.479 | 929641.425  | 8381545.984 | 1858100.266 |
| UT    | 278024.7814 | 55072.36801 | 1262036.529 | 107897.0765 |
| VA    | 569672.1204 | 109653.0617 | 2349039.988 | 217890.7646 |
| VI    | 5172.395896 | 1043.366504 | 47062.68486 | 2026.121724 |
| VT    | 5531.610707 | 1147.359475 | 9832.244605 | 2198.365509 |
| WA    | 904492.1398 | 179563.8033 | 2651497.893 | 351417.3098 |
| WI    | 235024.5952 | 46466.92401 | 376554.3182 | 91121.5971  |
| WY    | 3605.118718 | 665.3257847 | 11791.04258 | 1350.298341 |
| Total | 31706123.8  | 6279547.496 | 75744384.87 | 12303711.02 |

Table 14 Optimized long-range flight-level quantitative data for each destination state

| <b>State</b> | <b>CO2 Reduction (kg)</b> | <b>Fuel Cost Saving (\$)</b> | <b>Total Flight Distance (km)</b> | <b>Total Cost Saving (\$)</b> |
|--------------|---------------------------|------------------------------|-----------------------------------|-------------------------------|
| AK           | 2906.056516               | 525.3343092                  | 34915.18983                       | 1077.485047                   |
| AZ           | 81366.82075               | 15928.68745                  | 271068.8726                       | 31388.38339                   |
| CA           | 325412.9052               | 65115.63007                  | 2037595.184                       | 126944.0821                   |
| CO           | 22306.06988               | 4634.216659                  | 224616.1459                       | 8872.369936                   |
| FL           | 170558.9504               | 35267.85948                  | 662165.4219                       | 67674.06006                   |
| GA           | 4963.295445               | 1005.660571                  | 50570.95872                       | 1948.686705                   |
| HI           | 249476.9946               | 49013.58846                  | 1597755.322                       | 96414.21744                   |
| IL           | 3738.542858               | 786.909139                   | 101319.5417                       | 1497.232282                   |
| MA           | 129123.9067               | 25179.86972                  | 965075.4017                       | 49713.412                     |
| MI           | 9578.238901               | 1984.483857                  | 50209.4714                        | 3804.349249                   |
| MN           | 4259.423837               | 857.9520805                  | 44620.21629                       | 1667.242609                   |
| NJ           | 49671.45682               | 10246.43414                  | 428709.1339                       | 19684.01093                   |
| NV           | 51384.70482               | 9514.924902                  | 313835.6348                       | 19278.01882                   |
| NY           | 72134.23612               | 14891.63935                  | 640693.4477                       | 28597.14422                   |
| OR           | 21518.89579               | 4467.793881                  | 126087.481                        | 8556.384081                   |
| PA           | 22158.76197               | 4564.07929                   | 132803.275                        | 8774.244065                   |
| PR           | 7419.32617                | 1536.421511                  | 30747.0198                        | 2946.093484                   |
| TX           | 37862.80074               | 7342.545798                  | 206019.5158                       | 14536.47794                   |
| UT           | 5628.368206               | 1178.520619                  | 133889.0584                       | 2247.910578                   |
| VA           | 5741.882847               | 1166.662459                  | 46281.83359                       | 2257.6202                     |
| WA           | 165406.5969               | 34562.76165                  | 432622.8312                       | 65990.01506                   |
| <b>Total</b> | <b>1442618.236</b>        | <b>289771.9754</b>           | <b>8531600.957</b>                | <b>563869.4401</b>            |

## Supplementary materials for farm-and-flight selection optimization

Table 15 Detailed quantitative data for each solar farm and flight market penetration rate

| Solar Farm | Flight | Energy (MWh) | Duration (hours) | CO2 Reduction (kg) | Fuel Cost Saving (\$) | Total Cost Saving (\$) |
|------------|--------|--------------|------------------|--------------------|-----------------------|------------------------|
| 0.1        | 0.1    | 10365.88354  | 1845.899778      | 12335132.85        | 2241464.412           | 4585139.653            |
| 0.1        | 0.2    | 12541.91504  | 2057.328611      | 13700536.58        | 2440854.989           | 5043956.939            |
| 0.1        | 0.3    | 13131.91743  | 2153.874667      | 14343404.65        | 2555315.776           | 5280562.658            |
| 0.1        | 0.4    | 13131.91743  | 2153.874667      | 14343404.65        | 2555315.776           | 5280562.658            |
| 0.1        | 0.5    | 13131.91743  | 2153.874667      | 14343404.65        | 2555315.776           | 5280562.658            |
| 0.1        | 0.6    | 13131.91743  | 2153.874667      | 14343404.65        | 2555315.776           | 5280562.658            |
| 0.1        | 0.7    | 13131.91743  | 2153.874667      | 14343404.65        | 2555315.776           | 5280562.658            |
| 0.1        | 0.8    | 13131.91743  | 2153.874667      | 14343404.65        | 2555315.776           | 5280562.658            |
| 0.1        | 0.9    | 13131.91743  | 2153.874667      | 14343404.65        | 2555315.776           | 5280562.658            |
| 0.1        | 1      | 13131.91743  | 2153.874667      | 14343404.65        | 2555315.776           | 5280562.658            |
| 0.2        | 0.1    | 12711.65708  | 2447.938889      | 16407911.62        | 3032549.778           | 6150052.985            |
| 0.2        | 0.2    | 16252.89902  | 3135.986167      | 21021236.68        | 3886750.554           | 7880785.523            |
| 0.2        | 0.3    | 17995.19352  | 3529.8285        | 23675598.44        | 4392214.666           | 8890578.37             |
| 0.2        | 0.4    | 18906.22723  | 3688.292667      | 24733511.71        | 4583409.527           | 9282776.752            |
| 0.2        | 0.5    | 19174.03279  | 3797.810333      | 25482023.86        | 4736534.012           | 9578118.546            |
| 0.2        | 0.6    | 19174.67494  | 3798.051722      | 25483671.18        | 4736868.506           | 9578766.029            |
| 0.2        | 0.7    | 19174.67494  | 3798.051722      | 25483671.18        | 4736868.506           | 9578766.029            |
| 0.2        | 0.8    | 19174.67494  | 3798.051722      | 25483671.18        | 4736868.506           | 9578766.029            |
| 0.2        | 0.9    | 19174.67494  | 3798.051722      | 25483671.18        | 4736868.506           | 9578766.029            |
| 0.2        | 1      | 19174.67494  | 3798.051722      | 25483671.18        | 4736868.506           | 9578766.029            |
| 0.3        | 0.1    | 13857.92588  | 2915.963667      | 19606598.97        | 3686824.346           | 7412078.15             |
| 0.3        | 0.2    | 18560.97558  | 3874.130167      | 26042026.09        | 4889623.873           | 9837608.83             |
| 0.3        | 0.3    | 20924.20607  | 4474.097167      | 30099561.61        | 5676505.684           | 11395422.39            |
| 0.3        | 0.4    | 22376.7307   | 4695.306444      | 31567687.33        | 5932921.544           | 11930782.14            |
| 0.3        | 0.5    | 23091.82147  | 4882.093778      | 32831908.51        | 6179098.773           | 12417161.39            |
| 0.3        | 0.6    | 23349.54272  | 5153.262889      | 34704705.55        | 6581751.371           | 13175645.43            |
| 0.3        | 0.7    | 23398.68913  | 5229.2425        | 35230556.78        | 6695909.481           | 13389715.27            |
| 0.3        | 0.8    | 23398.68913  | 5229.2425        | 35230556.78        | 6695909.481           | 13389715.27            |
| 0.3        | 0.9    | 23398.68913  | 5229.2425        | 35230556.78        | 6695909.481           | 13389715.27            |
| 0.3        | 1      | 23398.68913  | 5229.2425        | 35230556.78        | 6695909.481           | 13389715.27            |
| 0.4        | 0.1    | 14725.46034  | 3175.158611      | 21366880.57        | 4035667.562           | 8095374.869            |

|     |     |             |             |             |             |             |
|-----|-----|-------------|-------------|-------------|-------------|-------------|
| 0.4 | 0.2 | 19845.04629 | 4338.091111 | 29205847.18 | 5529647.626 | 11078758.59 |
| 0.4 | 0.3 | 22843.23004 | 5166.332889 | 34819871.2  | 6631245.307 | 13247020.83 |
| 0.4 | 0.4 | 24677.85914 | 5575.9025   | 37579136.94 | 7155574.02  | 14295610.04 |
| 0.4 | 0.5 | 25715.50944 | 5894.453222 | 39743894.35 | 7585958.415 | 15137298.34 |
| 0.4 | 0.6 | 26244.36822 | 6122.944    | 41306977.01 | 7907160.403 | 15755486.04 |
| 0.4 | 0.7 | 26520.7485  | 6387.024    | 43129594.92 | 8297813.547 | 16492436.58 |
| 0.4 | 0.8 | 26581.50409 | 6536.392944 | 44165091.55 | 8524317.897 | 16915685.29 |
| 0.4 | 0.9 | 26581.50409 | 6536.392944 | 44165091.55 | 8524317.897 | 16915685.29 |
| 0.4 | 1   | 26581.50409 | 6536.392944 | 44165091.55 | 8524317.897 | 16915685.29 |
| 0.5 | 0.1 | 14973.38262 | 3269.266944 | 22009221.43 | 4166214.902 | 8347966.975 |
| 0.5 | 0.2 | 20645.26885 | 4673.769722 | 31501074.2  | 6000179.779 | 11985383.88 |
| 0.5 | 0.3 | 24155.85606 | 5710.721444 | 38541454.39 | 7393471.373 | 14716347.71 |
| 0.5 | 0.4 | 26237.71109 | 6329.165389 | 42740947.65 | 8225127.455 | 16345907.51 |
| 0.5 | 0.5 | 27549.33279 | 6828.976056 | 46152673.56 | 8918761.824 | 17687769.8  |
| 0.5 | 0.6 | 28368.02263 | 7179.088889 | 48547360.87 | 9410451.576 | 18634450.14 |
| 0.5 | 0.7 | 28960.68219 | 7459.378222 | 50467484.66 | 9807722.895 | 19396544.98 |
| 0.5 | 0.8 | 29218.16122 | 7673.645778 | 51944713.71 | 10122761.15 | 19992256.75 |
| 0.5 | 0.9 | 29266.16304 | 7701.390611 | 52135291.7  | 10162704.09 | 20068409.51 |
| 0.5 | 1   | 29266.16304 | 7701.390611 | 52135291.7  | 10162704.09 | 20068409.51 |
| 0.6 | 0.1 | 15049.33125 | 3318.629222 | 22348742.45 | 4237827.79  | 8484088.856 |
| 0.6 | 0.2 | 21146.96888 | 4923.303056 | 33211748.34 | 6355362.51  | 12665594.69 |
| 0.6 | 0.3 | 25035.40519 | 6214.780222 | 42003452.66 | 8118708.041 | 16099364.05 |
| 0.6 | 0.4 | 27434.79419 | 7004.393444 | 47377673.1  | 9195547.841 | 18197305.73 |
| 0.6 | 0.5 | 29067.85089 | 7666.274444 | 51900683.09 | 10120127.29 | 19981257.08 |
| 0.6 | 0.6 | 30103.93359 | 8016.050167 | 54282591.95 | 10598689.11 | 20912381.58 |
| 0.6 | 0.7 | 30864.37324 | 8372.351889 | 56723100.42 | 11103288.26 | 21880677.34 |
| 0.6 | 0.8 | 31256.07241 | 8603.456944 | 58310941.2  | 11436471.49 | 22515550.32 |
| 0.6 | 0.9 | 31434.77145 | 8765.130778 | 59426320.14 | 11675084.65 | 22966085.48 |
| 0.6 | 1   | 31434.77145 | 8765.130778 | 59426320.14 | 11675084.65 | 22966085.48 |
| 0.7 | 0.1 | 15101.56948 | 3352.753333 | 22583465.84 | 4287349.104 | 8578207.613 |
| 0.7 | 0.2 | 21432.10835 | 5088.725278 | 34348076.93 | 6593574.644 | 13119709.26 |
| 0.7 | 0.3 | 25580.14335 | 6491.636889 | 43902012.77 | 8513472.495 | 16854854.92 |
| 0.7 | 0.4 | 28219.23225 | 7416.526111 | 50205166.38 | 9784734.74  | 19323716.35 |
| 0.7 | 0.5 | 30137.84627 | 8188.523333 | 55479997.59 | 10862330.85 | 21403530.39 |
| 0.7 | 0.6 | 31384.57577 | 8712.108667 | 59060119.81 | 11596341.95 | 22817764.72 |
| 0.7 | 0.7 | 32275.34882 | 9091.571389 | 61655387.55 | 12129049.71 | 23843573.34 |
| 0.7 | 0.8 | 32796.9801  | 9383.781222 | 63661792.01 | 12548798.24 | 24644538.72 |
| 0.7 | 0.9 | 33097.87475 | 9589.882611 | 65080165.92 | 12848742.49 | 25213974.01 |
| 0.7 | 1   | 33126.18755 | 9607.318611 | 65200021.98 | 12873951.78 | 25261955.96 |

|     |     |             |             |             |             |             |
|-----|-----|-------------|-------------|-------------|-------------|-------------|
| 0.8 | 0.1 | 15116.25114 | 3368.463333 | 22691977.04 | 4310690.967 | 8622166.605 |
| 0.8 | 0.2 | 21625.97418 | 5172.053722 | 34918070.72 | 6710656.23  | 13345089.67 |
| 0.8 | 0.3 | 25872.14236 | 6666.608667 | 45104400.62 | 8765993.09  | 17335829.21 |
| 0.8 | 0.4 | 28744.16239 | 7680.164222 | 52012781.88 | 10160291.48 | 20042720.04 |
| 0.8 | 0.5 | 30851.65864 | 8558.474    | 58017631.63 | 11390653.76 | 22414003.77 |
| 0.8 | 0.6 | 32305.08299 | 9151.327111 | 62069382.09 | 12219348.94 | 24012531.54 |
| 0.8 | 0.7 | 33311.75673 | 9581.964278 | 65014851.34 | 12824143.1  | 25176964.85 |
| 0.8 | 0.8 | 33938.82534 | 9893.022111 | 67147226.1  | 13266802.18 | 26024775.14 |
| 0.8 | 0.9 | 34344.72289 | 10132.99561 | 68796038.79 | 13612819.31 | 26684066.68 |
| 0.8 | 1   | 34434.52086 | 10212.9475  | 69347554.02 | 13730736.94 | 26906772.2  |
| 0.9 | 0.1 | 15117.36034 | 3370.585444 | 22706676.71 | 4313894.685 | 8628163.26  |
| 0.9 | 0.2 | 21657.08529 | 5193.2885   | 35064201.56 | 6741553.343 | 13403751.64 |
| 0.9 | 0.3 | 26002.85518 | 6738.333111 | 45596754.74 | 8868867.391 | 17532250.79 |
| 0.9 | 0.4 | 29029.12654 | 7833.969389 | 53068357.12 | 10380623.52 | 20463611.37 |
| 0.9 | 0.5 | 31240.68486 | 8734.027111 | 59219403.6  | 11638442.03 | 22890128.71 |
| 0.9 | 0.6 | 32851.23198 | 9407.702611 | 63825489.42 | 12582490.57 | 24709333.56 |
| 0.9 | 0.7 | 33966.64628 | 9913.475167 | 67288080.34 | 13296686.27 | 26081421.54 |
| 0.9 | 0.8 | 34669.81146 | 10251.27583 | 69602718.64 | 13776115.72 | 27000632.26 |
| 0.9 | 0.9 | 35141.47469 | 10529.03756 | 71511078.3  | 14176512.3  | 27763617.18 |
| 0.9 | 1   | 35332.09788 | 10654.52761 | 72374335.25 | 14358710.84 | 28109834.54 |
| 1   | 0.1 | 15116.08497 | 3370.193667 | 22704014.29 | 4313365.319 | 8627128.034 |
| 1   | 0.2 | 21663.45592 | 5194.703944 | 35073735.94 | 6743363.631 | 13407373.46 |
| 1   | 0.3 | 26019.71403 | 6749.786167 | 45675567.16 | 8885527.283 | 17563885.04 |
| 1   | 0.4 | 29104.6033  | 7878.661167 | 53375431.47 | 10445071.21 | 20586403.18 |
| 1   | 0.5 | 31369.00575 | 8799.760333 | 59670221.56 | 11732228.58 | 23069570.68 |
| 1   | 0.6 | 33077.46684 | 9539.466778 | 64730654.63 | 12772285.76 | 25071110.14 |
| 1   | 0.7 | 34248.06961 | 10049.78928 | 68222227.72 | 13490287.45 | 26452510.72 |
| 1   | 0.8 | 35017.885   | 10429.33528 | 70823880.37 | 14030139    | 27486676.27 |
| 1   | 0.9 | 35546.12597 | 10722.27706 | 72835056.04 | 14450631.36 | 28289292.01 |
| 1   | 1   | 35794.19273 | 10880.48194 | 73922989.23 | 14679879.02 | 28725246.97 |

Table 16 System parameters

| <b>Symbol</b>    | <b>Description</b>                        | <b>Value</b> | <b>Unit</b>             |
|------------------|-------------------------------------------|--------------|-------------------------|
| $\dot{m}_{fuel}$ | Fuel burn rate                            | 2,200        | kg/h                    |
| $C_{fuel}$       | Fuel price                                | 0.7          | \$/kg                   |
| $e_{fuel}$       | CO2 per fuel                              | 3.16         | kg CO2/kg               |
| $P_{cruise}$     | Cruise power demand                       | 10.3         | MW                      |
| $v_{cruise}$     | Cruise speed                              | 235          | m/s                     |
| $h_{cruise}$     | Cruise altitude                           | 12,100       | m                       |
| $A_r$            | Receiving aperture                        | 261.6        | m <sup>2</sup>          |
| $\varepsilon$    | Powered threshold                         | 1            | MW                      |
| $\lambda$        | Operating wavelength                      | 0.05         | m                       |
| $\tau_{max}$     | Max time shift                            | 1,800        | s                       |
| $S_{ab}$         | Safety ground-level power density         | 20           | W/m <sup>2</sup>        |
| $C_{elec}$       | Solar electricity cost                    | 58           | \$/MWh                  |
| $e_{solar}$      | Solar CO <sub>2</sub> intensity           | 48           | kg CO <sub>2</sub> /MWh |
| $C_{CO2}$        | Social cost of carbon                     | 0.19         | \$/kg CO <sub>2</sub>   |
| $P_f$            | Effective capacity of each solar farm $f$ | /            | MW                      |
| $\eta_{dc-rf}$   | DC to RF conversion                       | 68.87%       | /                       |
| $\eta_{free}$    | Free-space propagation                    | 95%          | /                       |
| $\eta_{rf-dc}$   | RF to DC conversion                       | 78.67%       | /                       |
| $\eta_{spot}$    | Beam spot efficiency                      | 87%          | /                       |
| $\eta_{sys}$     | End-to-end efficiency                     | 44.78%       | /                       |

Table 17 Notation for optimization

| Symbol                    | Description                                                                                        |
|---------------------------|----------------------------------------------------------------------------------------------------|
| <b>Sets</b>               |                                                                                                    |
| $I$                       | Set of flights, $ I  = 143,152$                                                                    |
| $F$                       | Set of qualified solar farms, $ F  = 437$                                                          |
| $T$                       | Set of discrete time steps over the analysis horizon                                               |
| $S_i$                     | Set of admissible time-shift options for flight $i$ ; $S_i = \{-\tau_{\max}, \dots, \tau_{\max}\}$ |
| <b>Parameters</b>         |                                                                                                    |
| $z_{f,i,t}$               | Slant-range distance between farm $f$ and flight $i$ at time $t$                                   |
| $a_{f,i,t}$               | Binary coverage parameter: 1 if flight $i$ within energy boundary of farm $f$ at time $t$          |
| $c_{i,t,s}$               | Binary in-flight indicator: 1 if flight $i$ airborne at time $t$ under shift $s$                   |
| <b>Decision Variables</b> |                                                                                                    |
| $p_{f,i,t}$               | Power transmitted from farm $f$ to flight $i$ at time $t$ (continuous, $\geq 0$ )                  |
| $r_{i,t}$                 | Total received power at flight $i$ at time $t$ (continuous, $\geq 0$ )                             |
| $b_{i,t}$                 | Binary: 1 if flight $i$ receives beamed power at time $t$                                          |
| $d_{i,s}$                 | Binary: 1 if flight $i$ is shifted by $s$ (flight schedule optimization only)                      |
| $x_f$                     | Binary: 1 if farm $f$ is equipped with SoPhAr (farm-and-flight choice optimization only)           |
| $x_i$                     | Binary: 1 if flight $i$ is equipped with receiver (farm-and-flight choice optimization only)       |

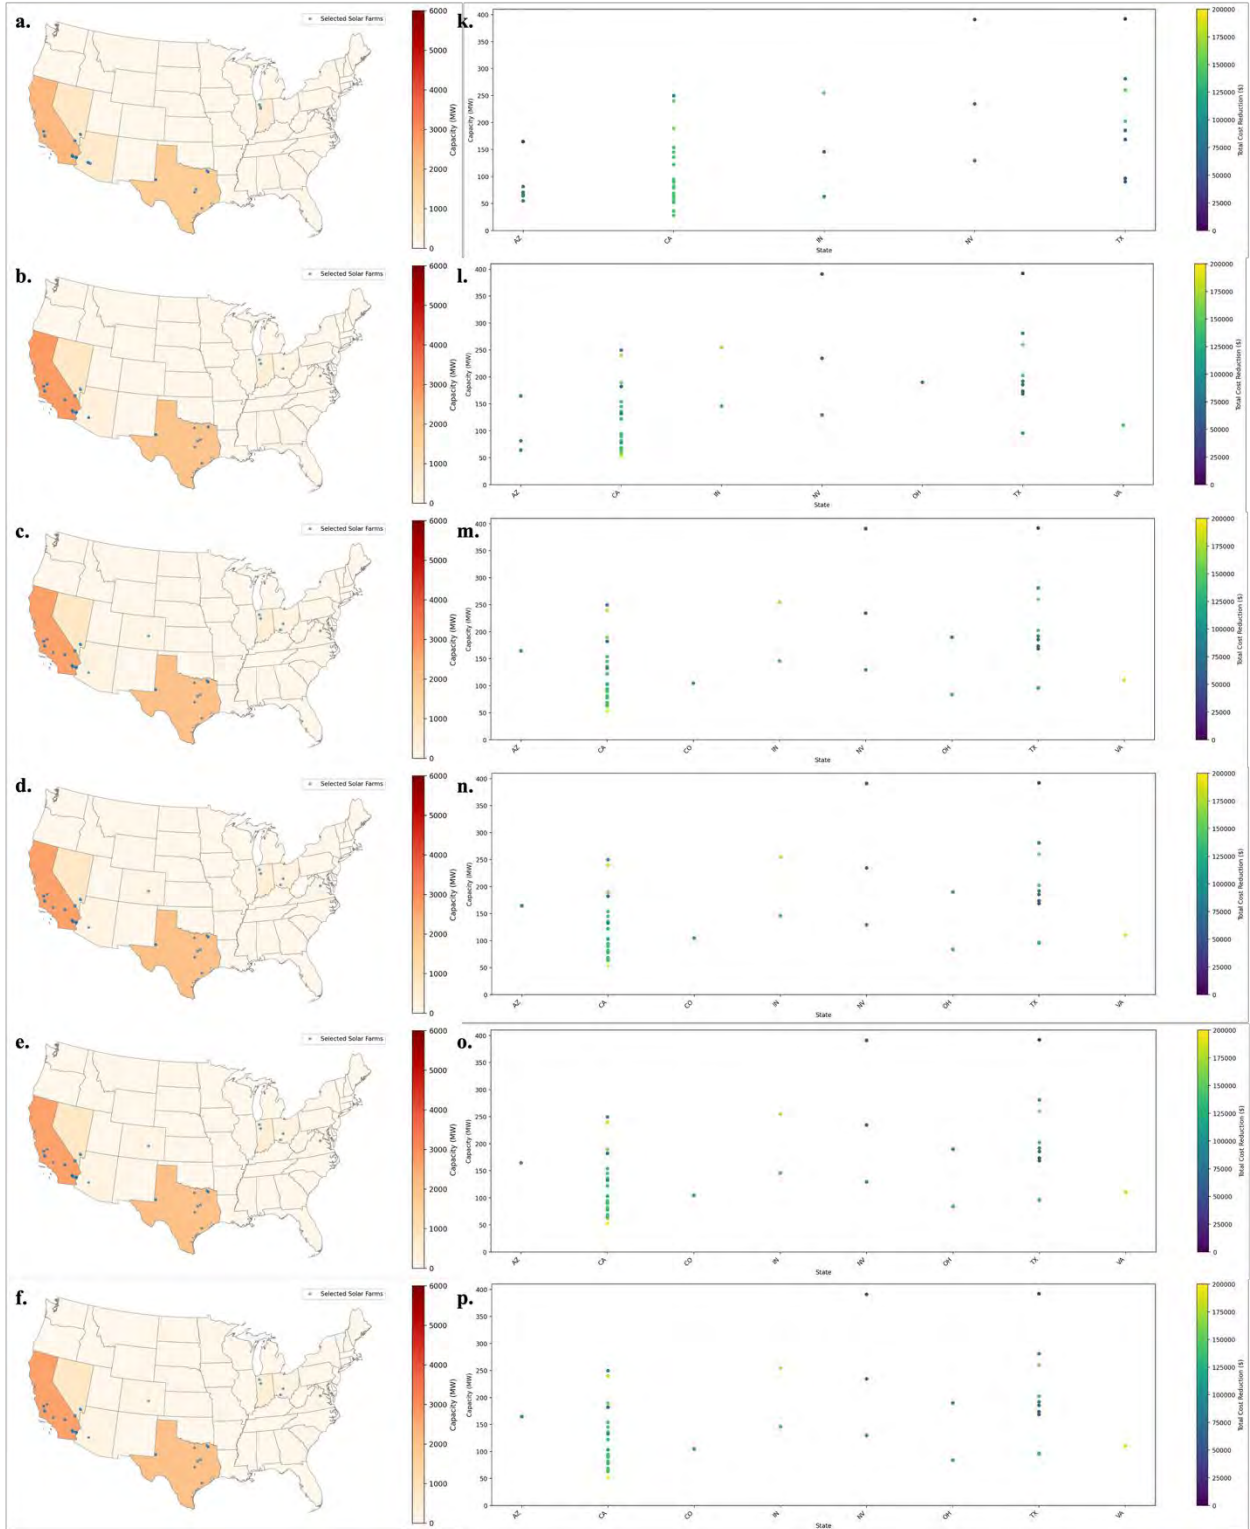

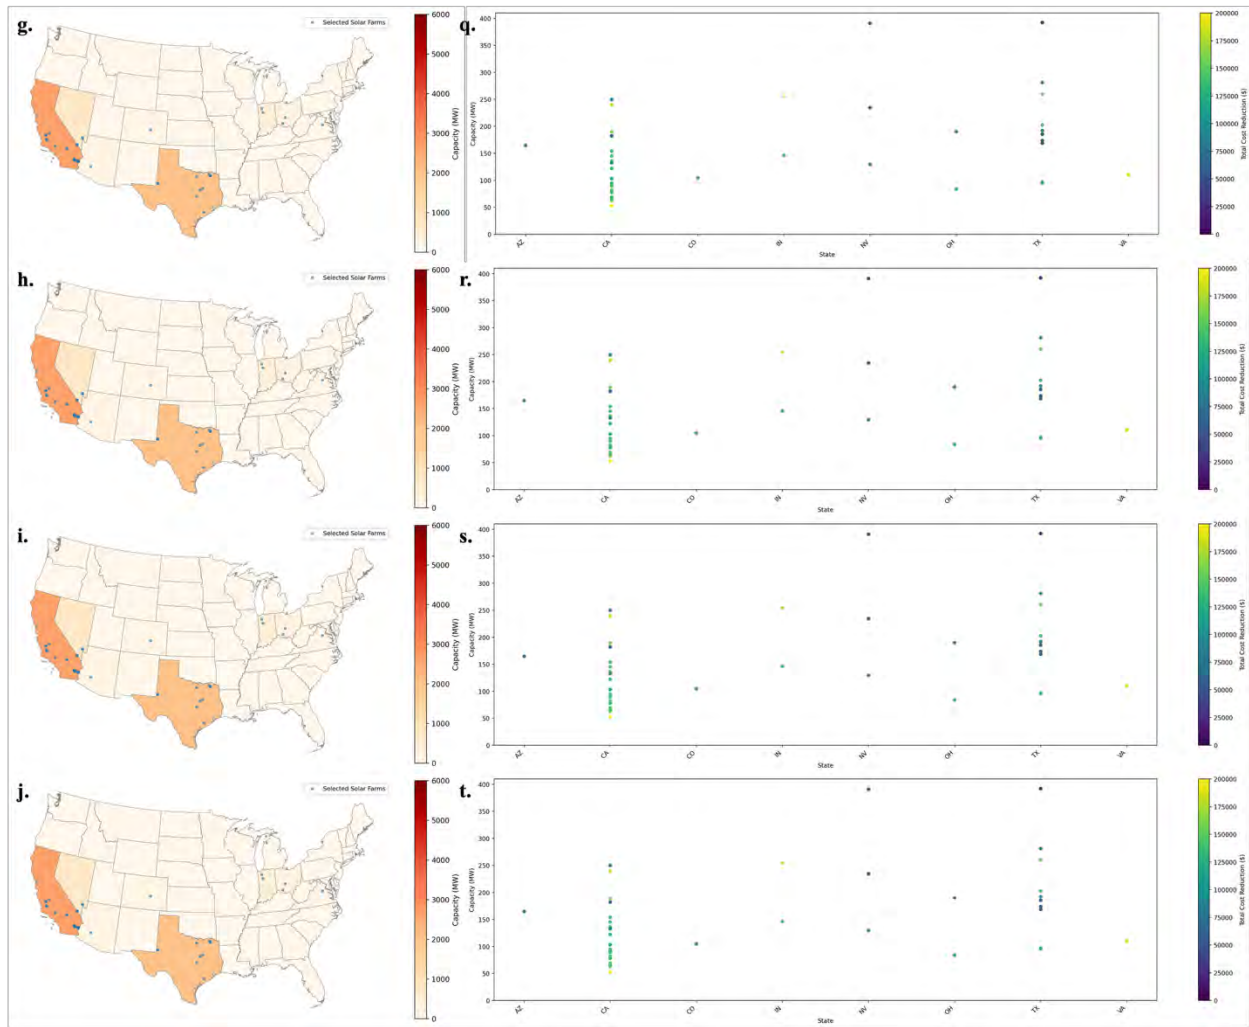

Figure 1 10% Solar farm selection across different flight market penetration rates

a-j, Spatial distribution of selected solar farms (blue dots); and the color of the states represents the total optimized solar capacity (MW). k-t, Scatter plot aggregates the relationship between individual solar farm capacity (MW) and total cost reduction (\$), colored by cost reduction magnitude; and each dot represents one farm, clustered by state.

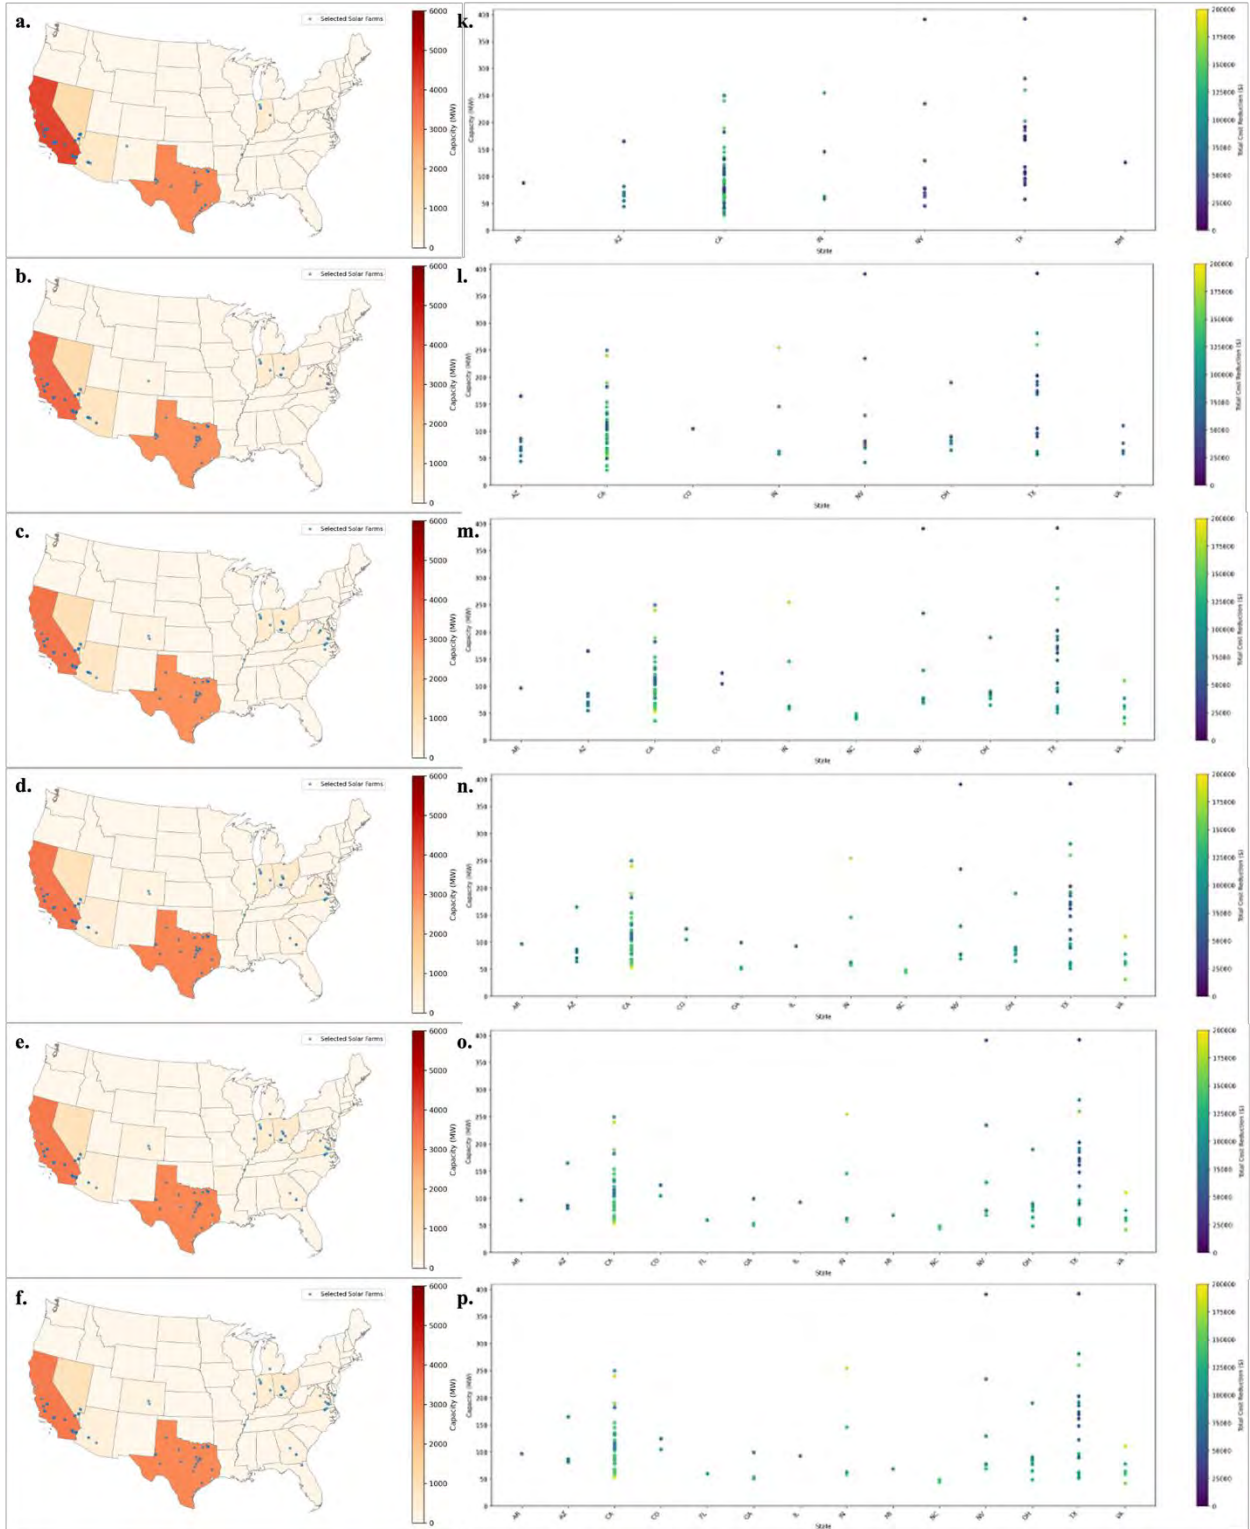

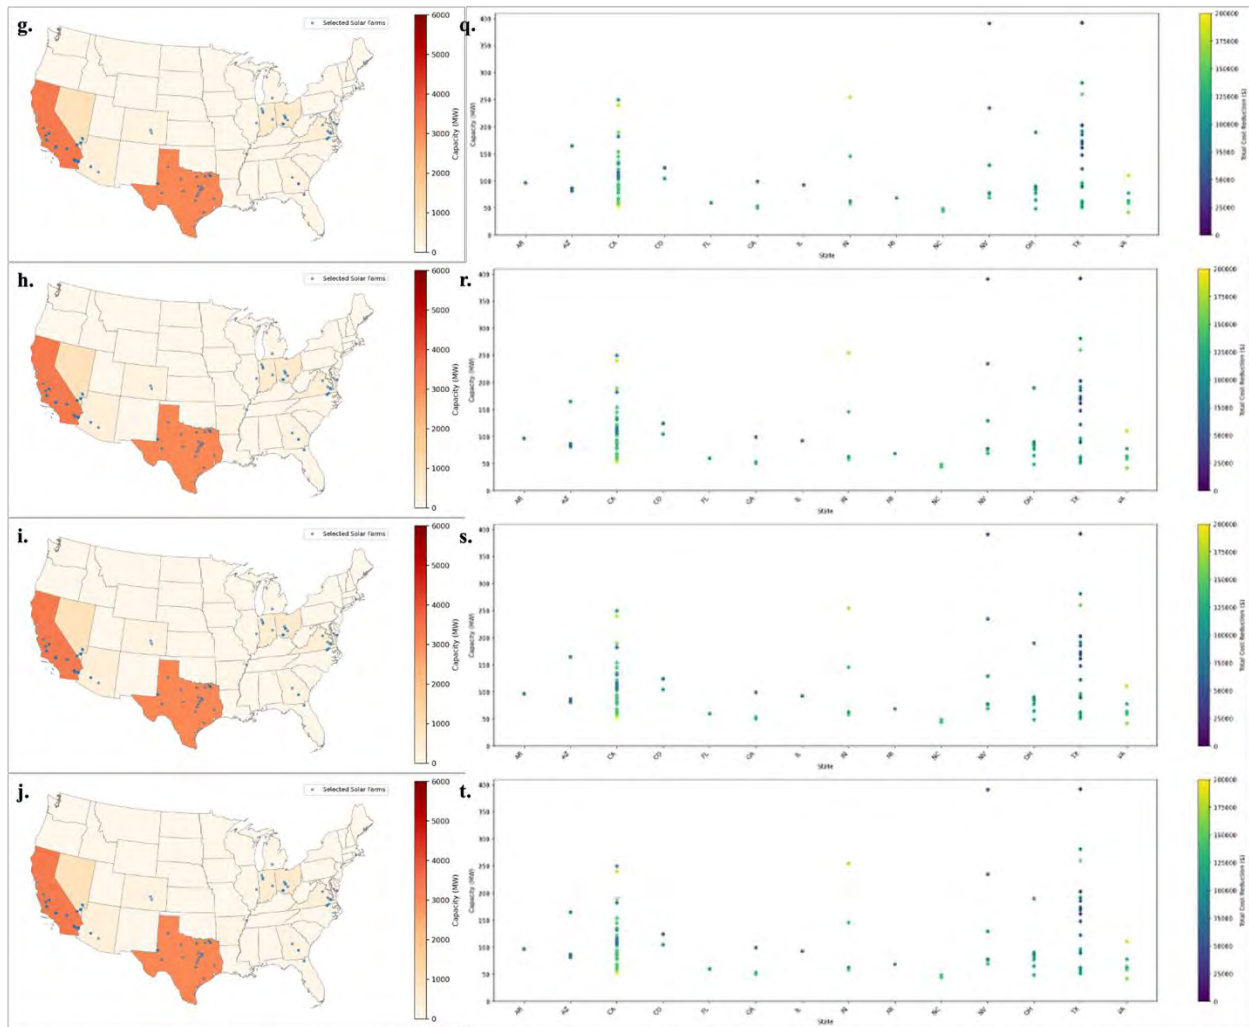

Figure 2 20% Solar farm selection across different flight market penetration rates

a-j, Spatial distribution of selected solar farms (blue dots); and the color of the states represents the total optimized solar capacity (MW). k-t, Scatter plot aggregates the relationship between individual solar farm capacity (MW) and total cost reduction (\$), colored by cost reduction magnitude; and each dot represents one farm, clustered by state.

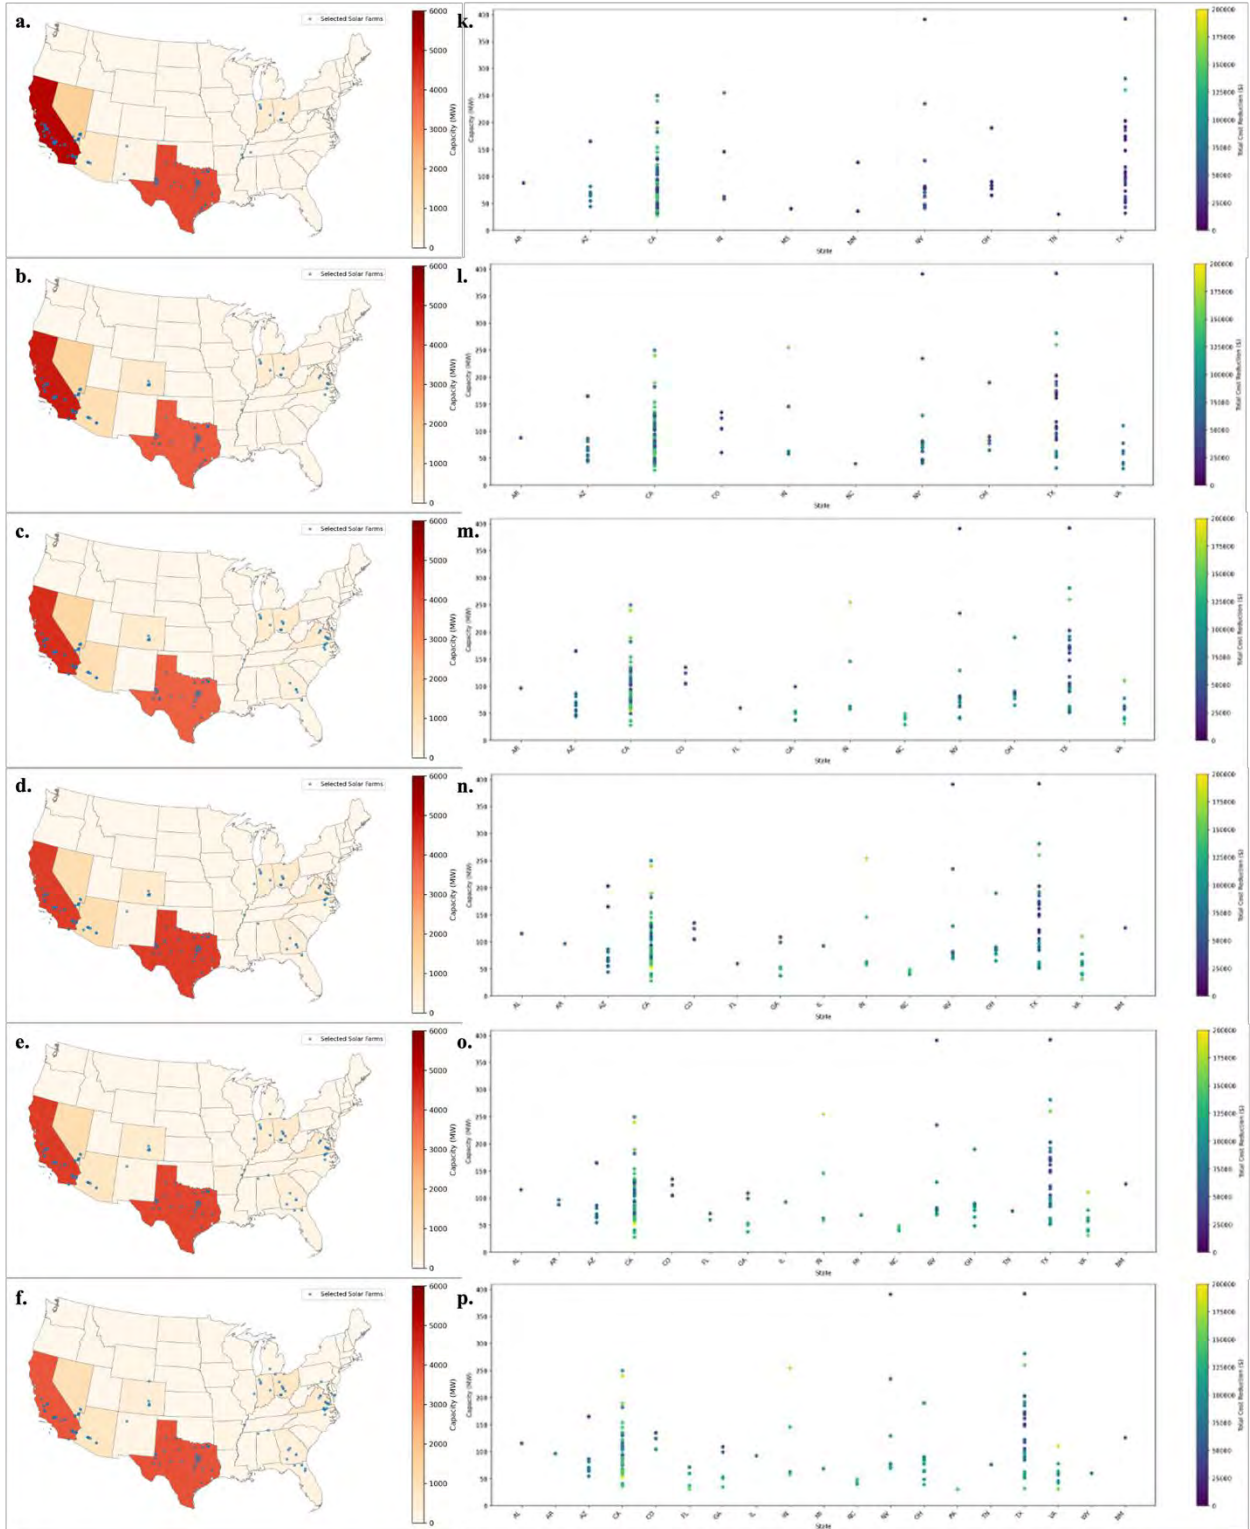

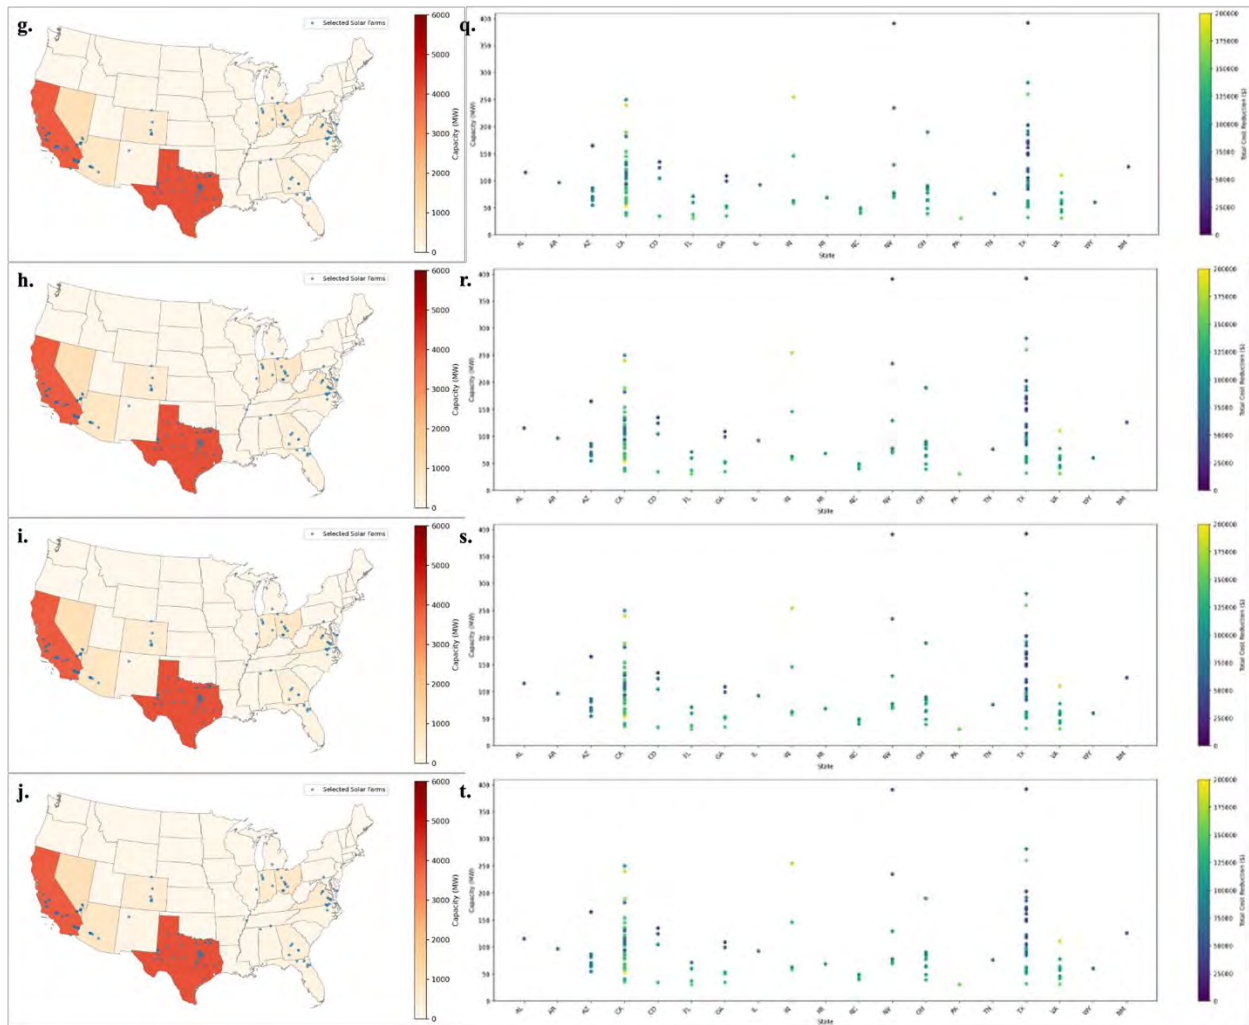

Figure 3 30% Solar farm selection across different flight market penetration rates

a-j, Spatial distribution of selected solar farms (blue dots); and the color of the states represents the total optimized solar capacity (MW). k-t, Scatter plot aggregates the relationship between individual solar farm capacity (MW) and total cost reduction (\$), colored by cost reduction magnitude; and each dot represents one farm, clustered by state.



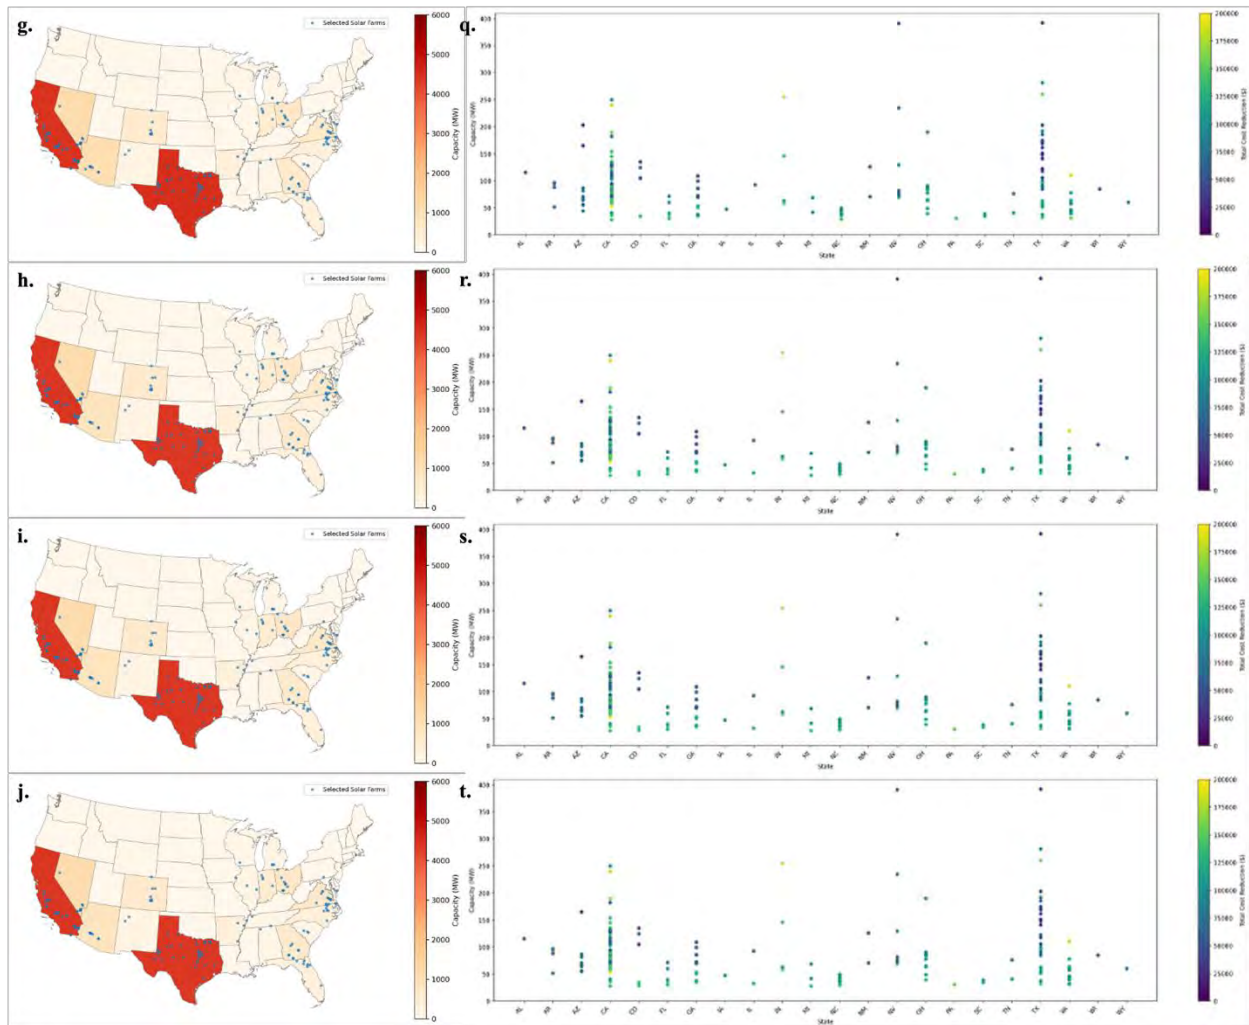

Figure 4 40% Solar farm selection across different flight market penetration rates

a-j, Spatial distribution of selected solar farms (blue dots); and the color of the states represents the total optimized solar capacity (MW). k-t, Scatter plot aggregates the relationship between individual solar farm capacity (MW) and total cost reduction (\$), colored by cost reduction magnitude; and each dot represents one farm, clustered by state.

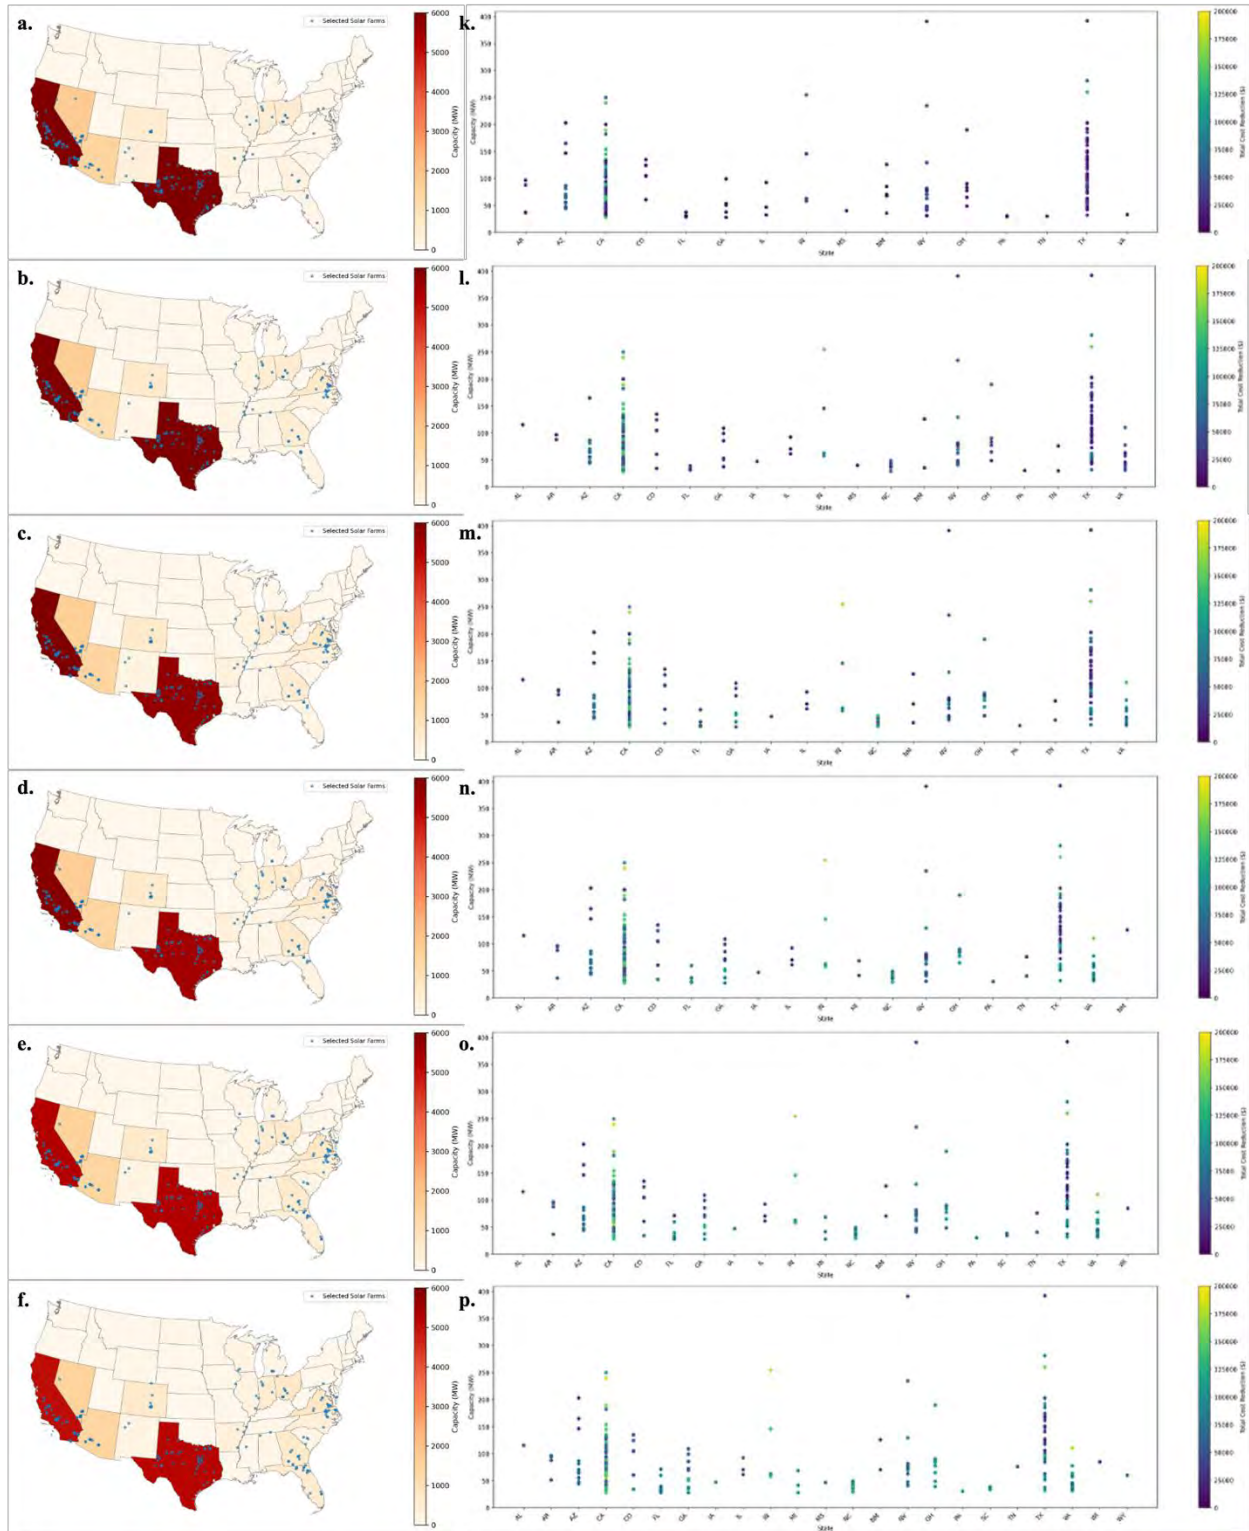

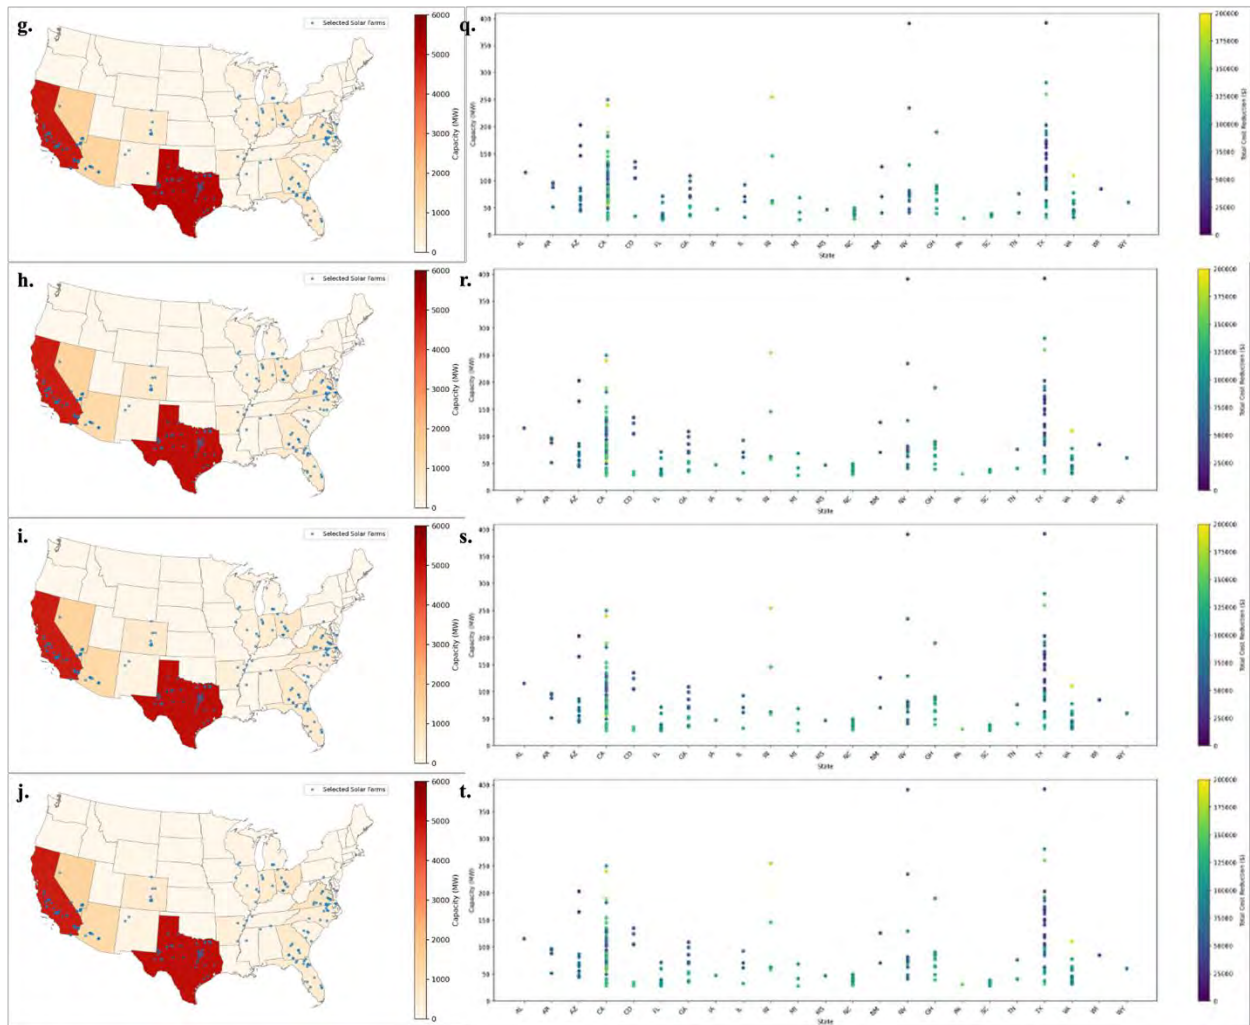

Figure 5 50% Solar farm selection across different flight market penetration rates

a-j, Spatial distribution of selected solar farms (blue dots); and the color of the states represents the total optimized solar capacity (MW). k-t, Scatter plot aggregates the relationship between individual solar farm capacity (MW) and total cost reduction (\$), colored by cost reduction magnitude; and each dot represents one farm, clustered by state.



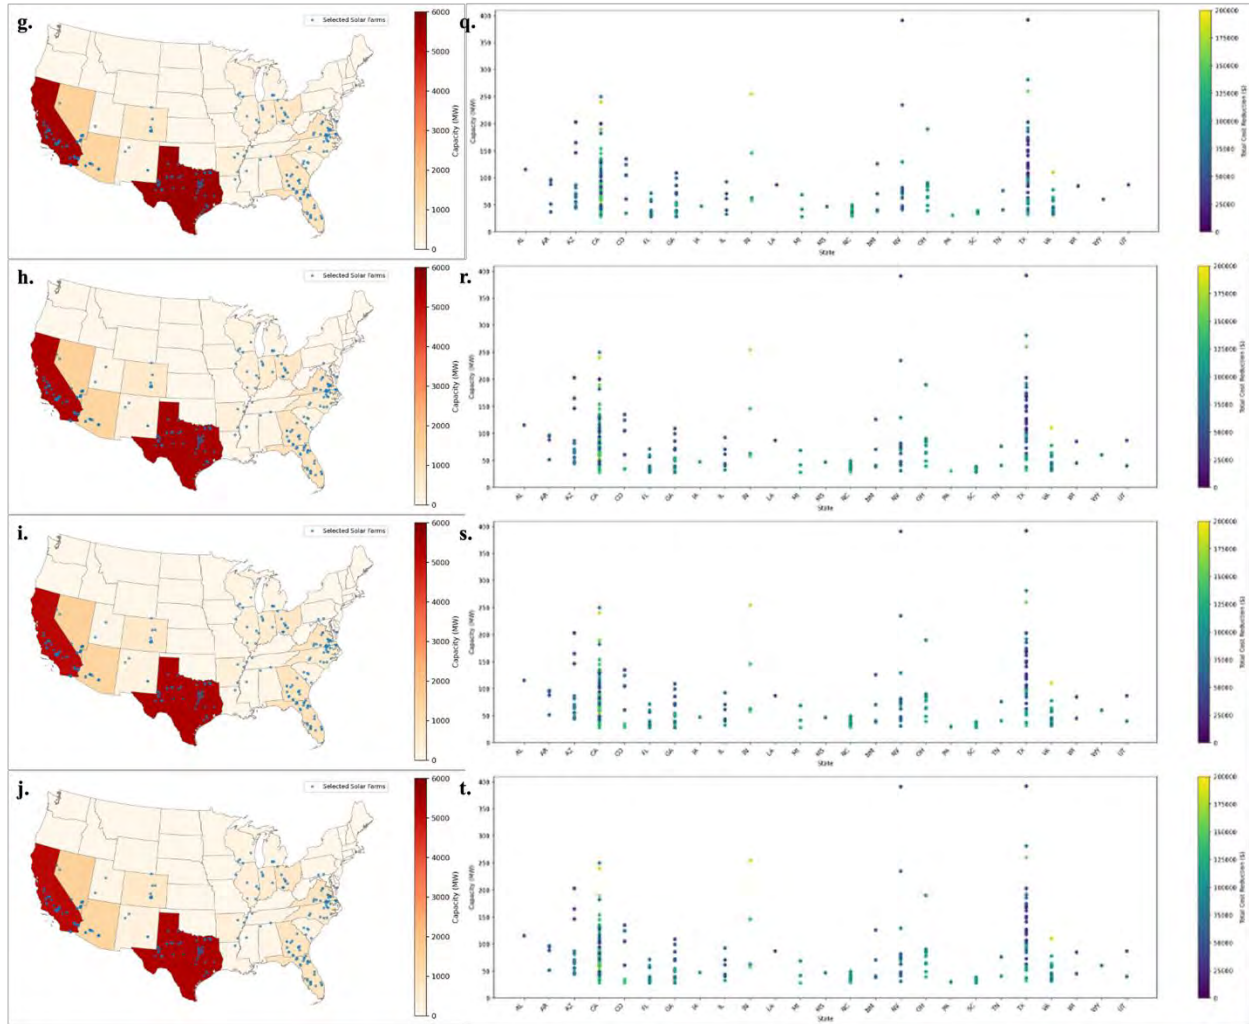

Figure 6 60% Solar farm selection across different flight market penetration rates

a-j, Spatial distribution of selected solar farms (blue dots); and the color of the states represents the total optimized solar capacity (MW). k-t, Scatter plot aggregates the relationship between individual solar farm capacity (MW) and total cost reduction (\$), colored by cost reduction magnitude; and each dot represents one farm, clustered by state.

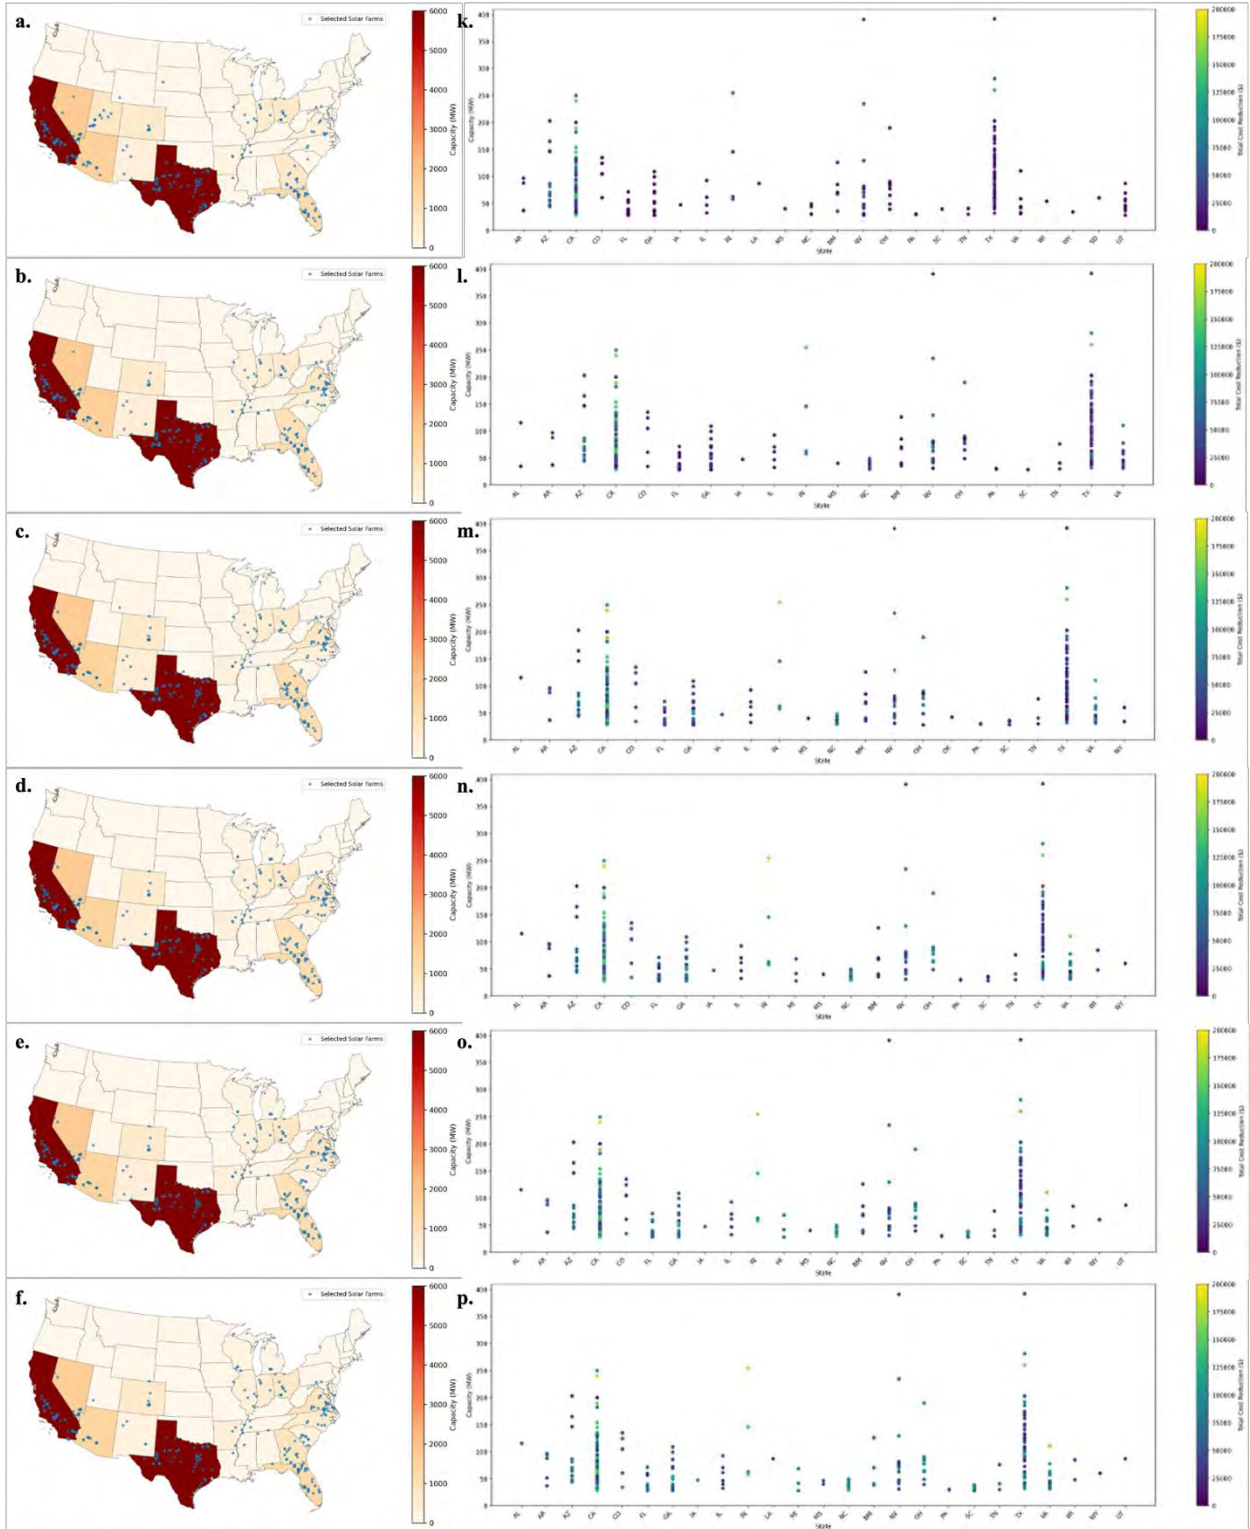

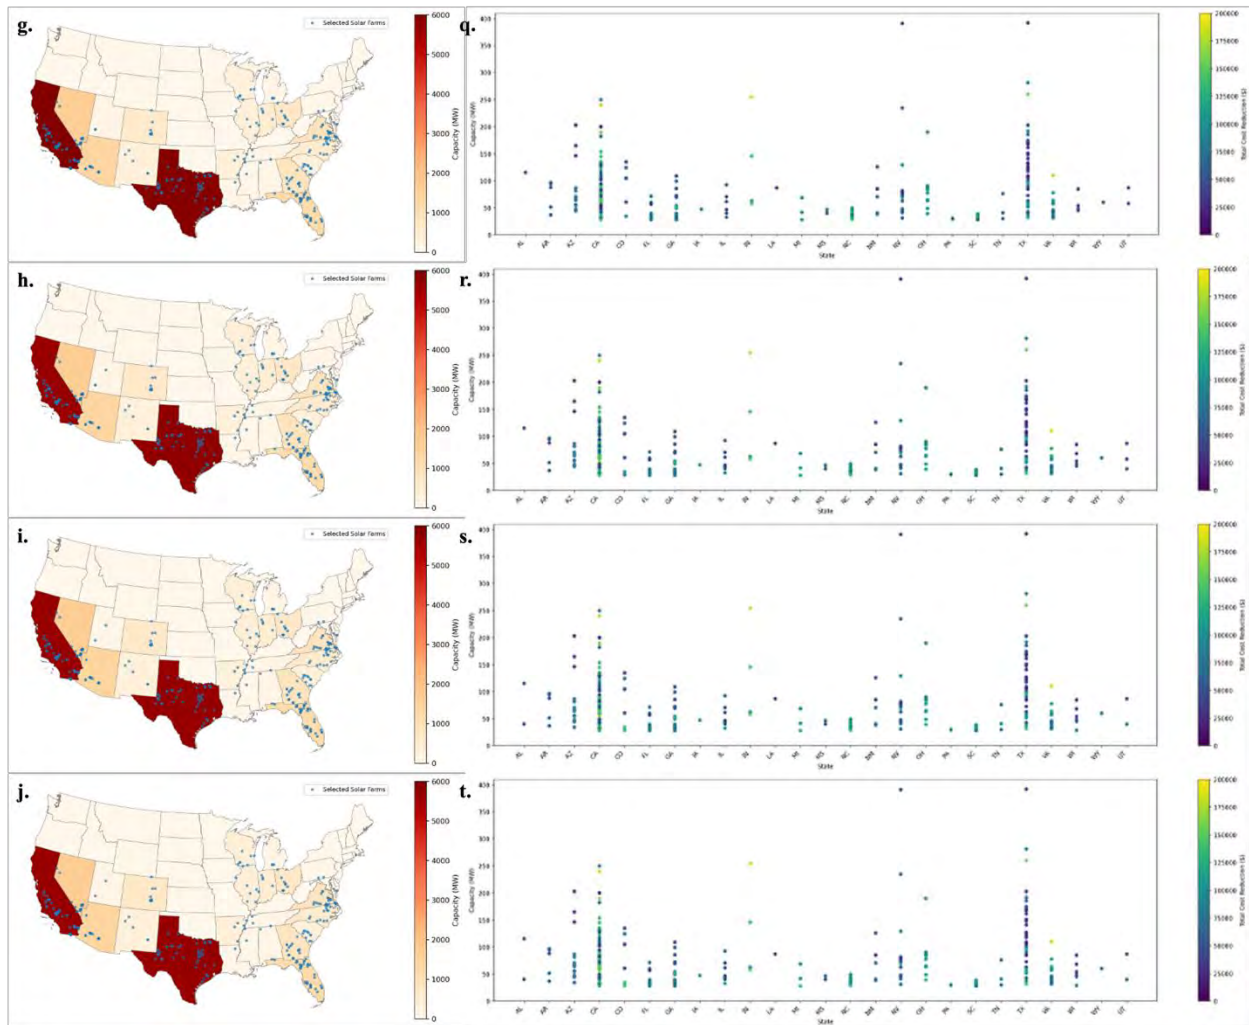

Figure 7 70% Solar farm selection across different flight market penetration rates

a-j, Spatial distribution of selected solar farms (blue dots); and the color of the states represents the total optimized solar capacity (MW). k-t, Scatter plot aggregates the relationship between individual solar farm capacity (MW) and total cost reduction (\$), colored by cost reduction magnitude; and each dot represents one farm, clustered by state.

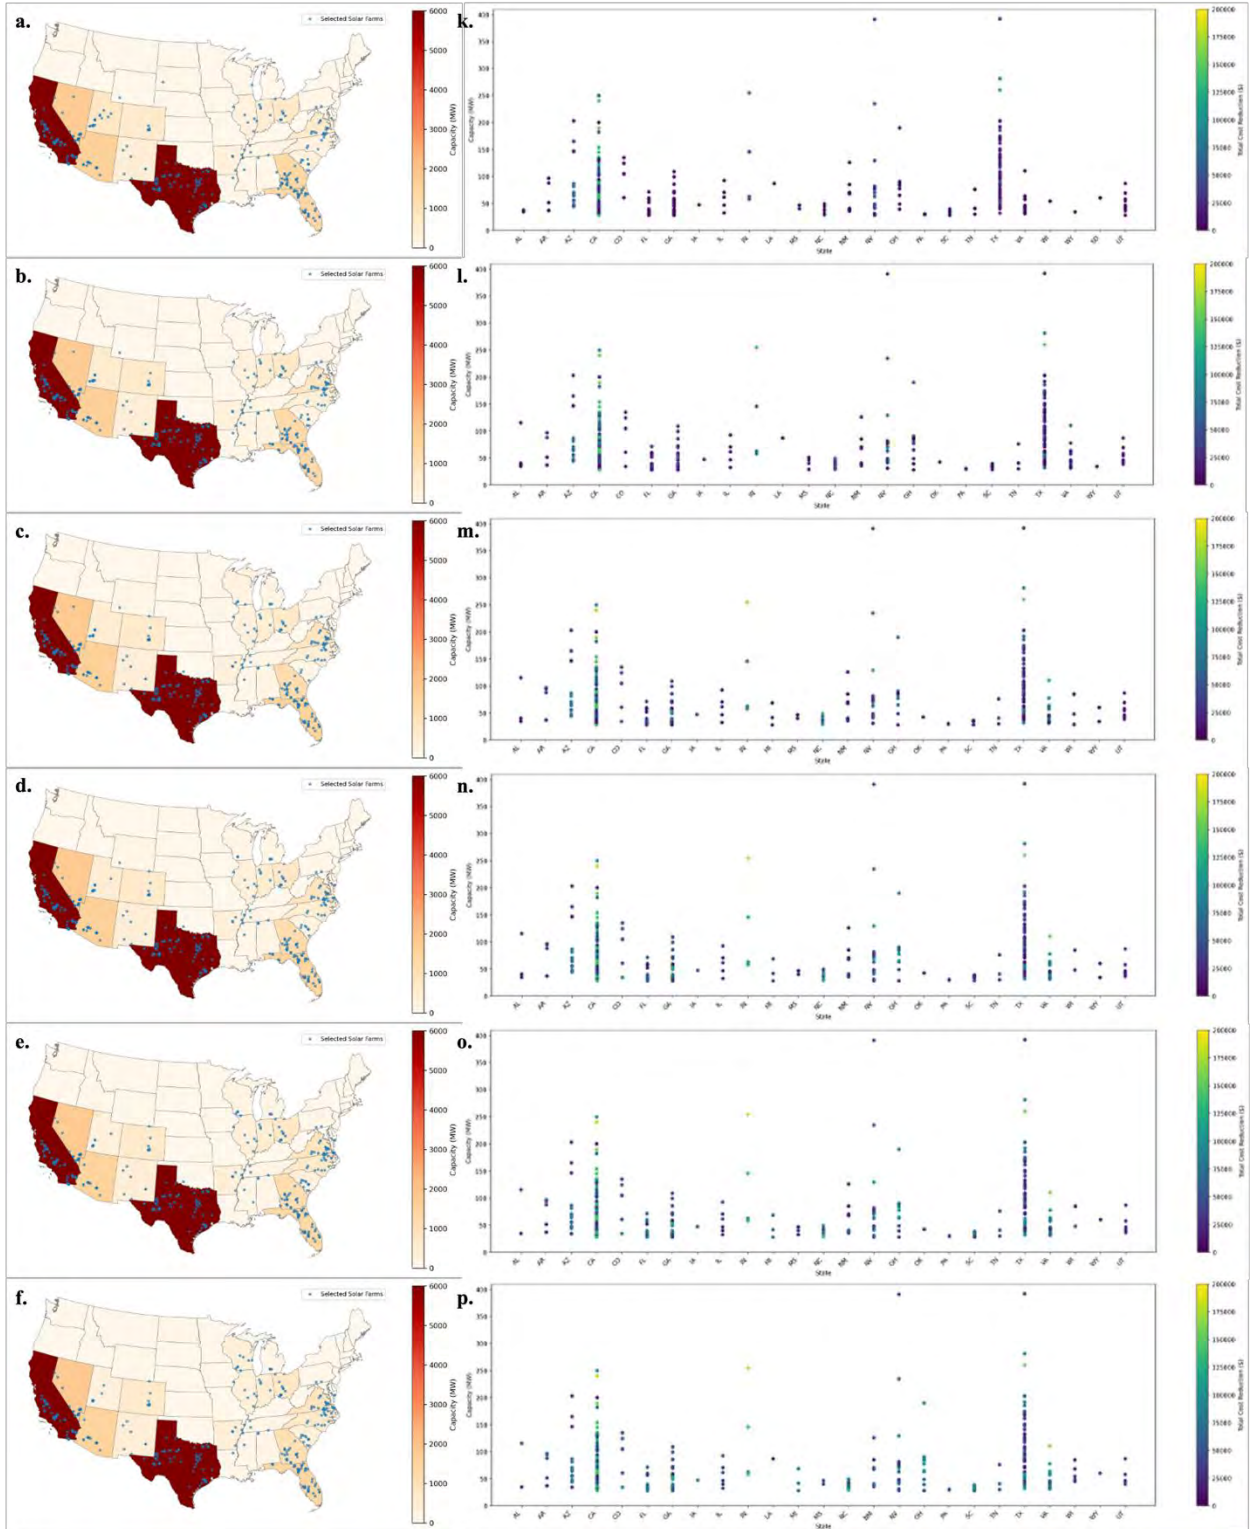

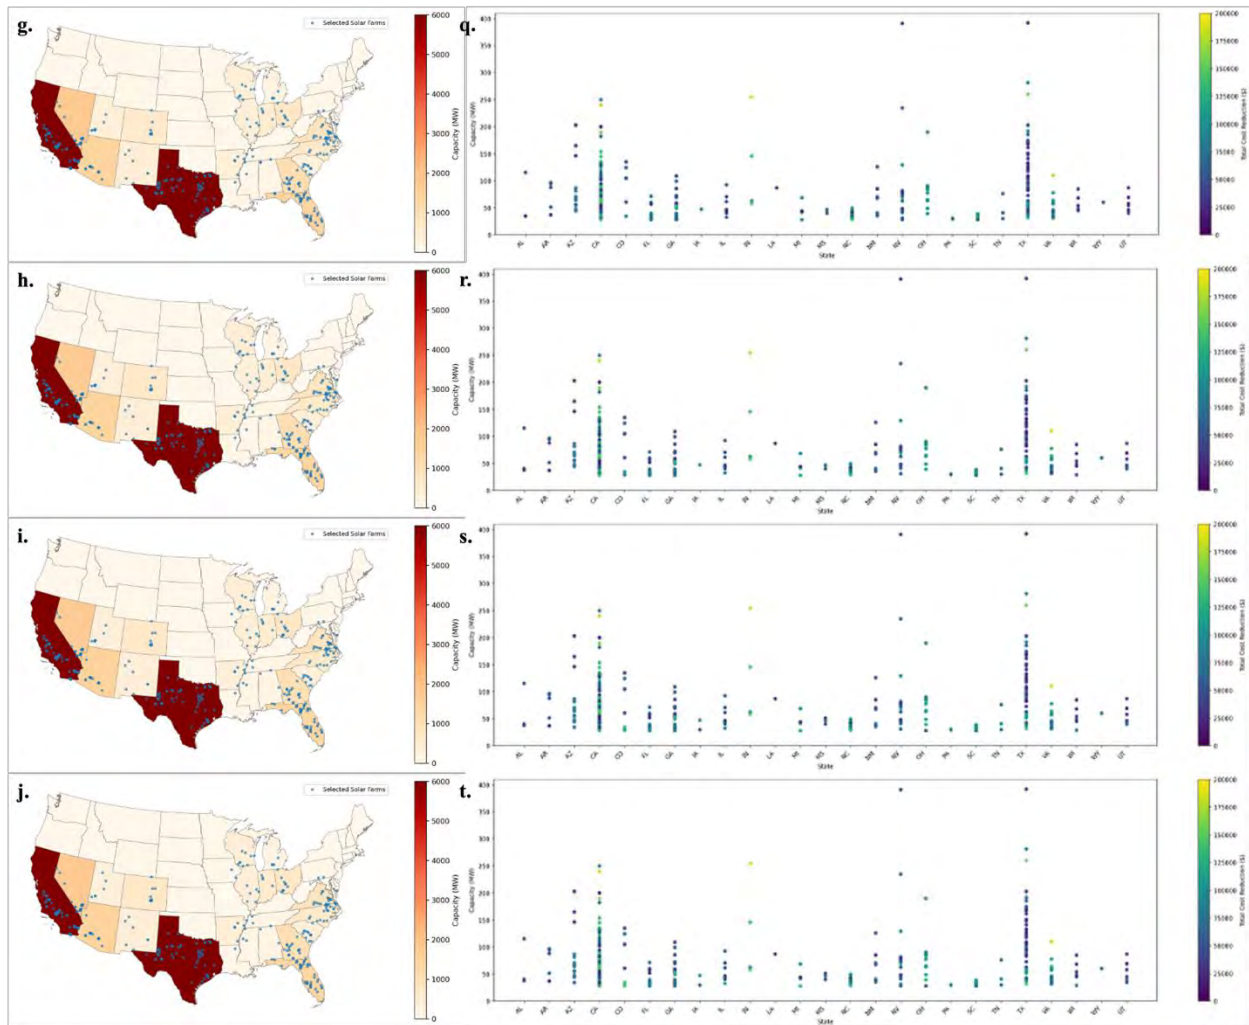

Figure 8 80% Solar farm selection across different flight market penetration rates

a-j, Spatial distribution of selected solar farms (blue dots); and the color of the states represents the total optimized solar capacity (MW). k-t, Scatter plot aggregates the relationship between individual solar farm capacity (MW) and total cost reduction (\$), colored by cost reduction magnitude; and each dot represents one farm, clustered by state.

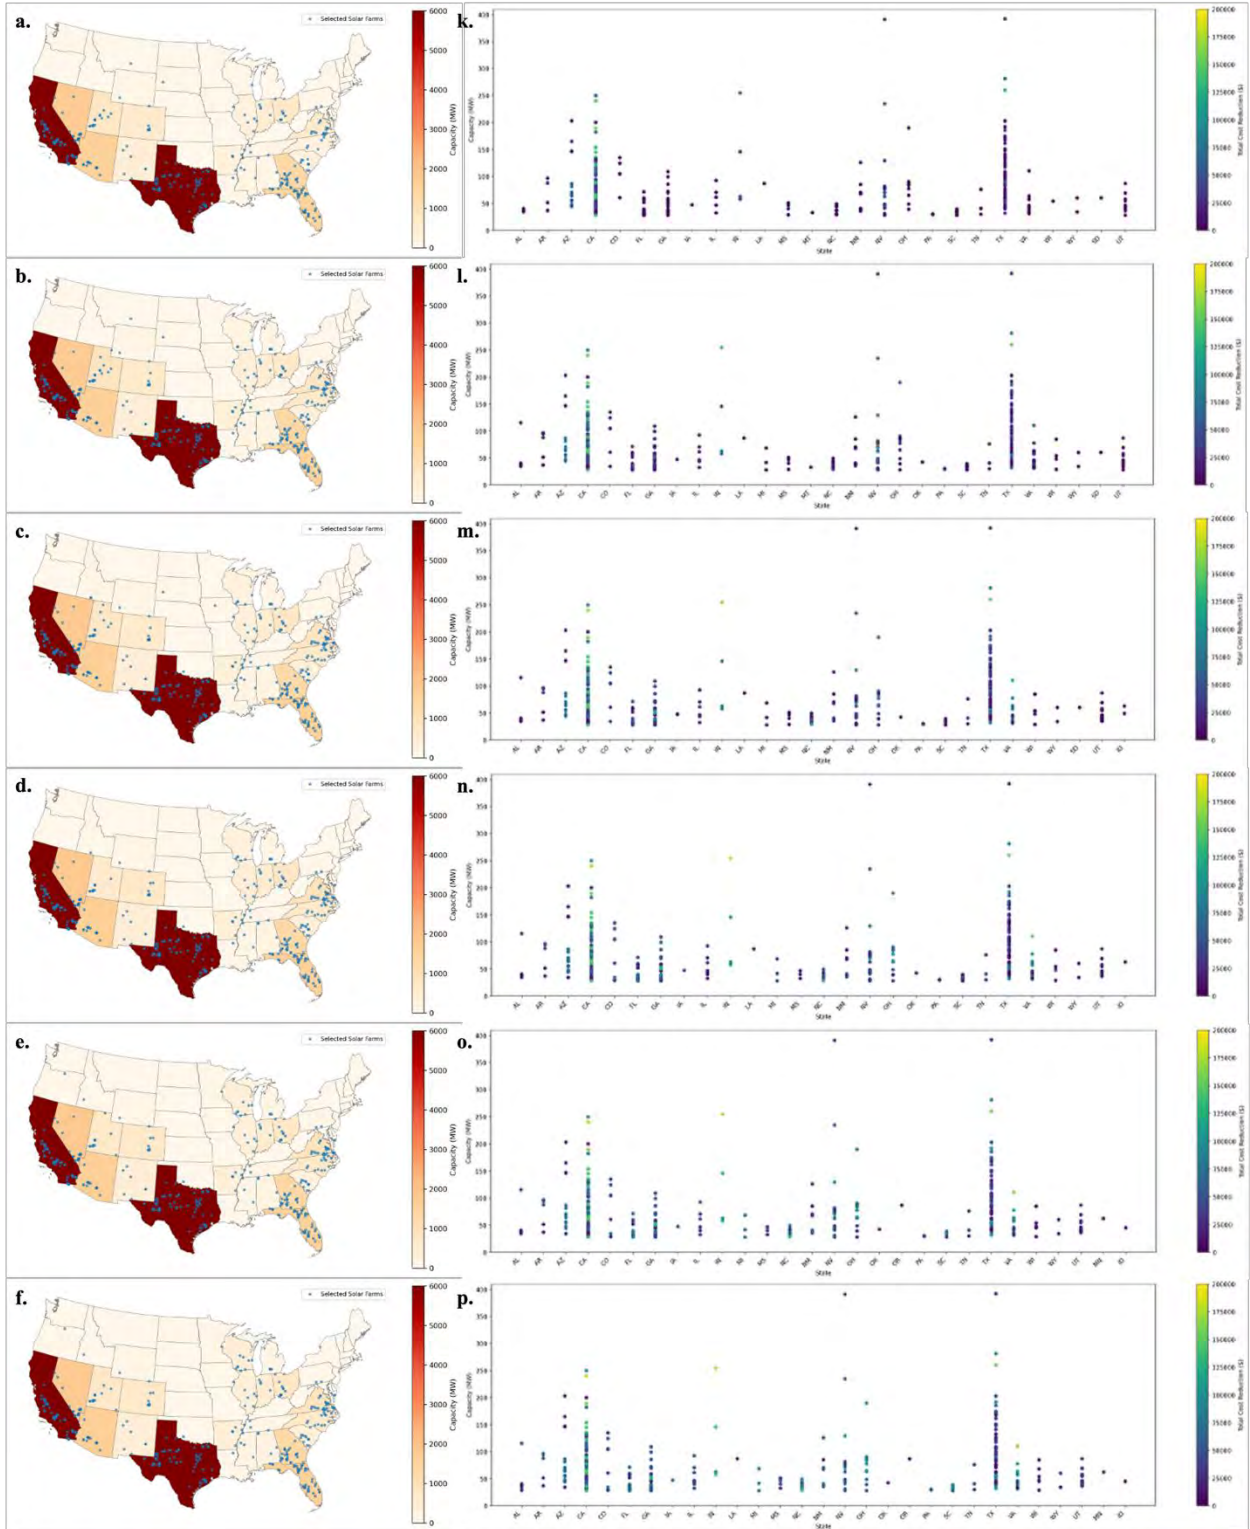

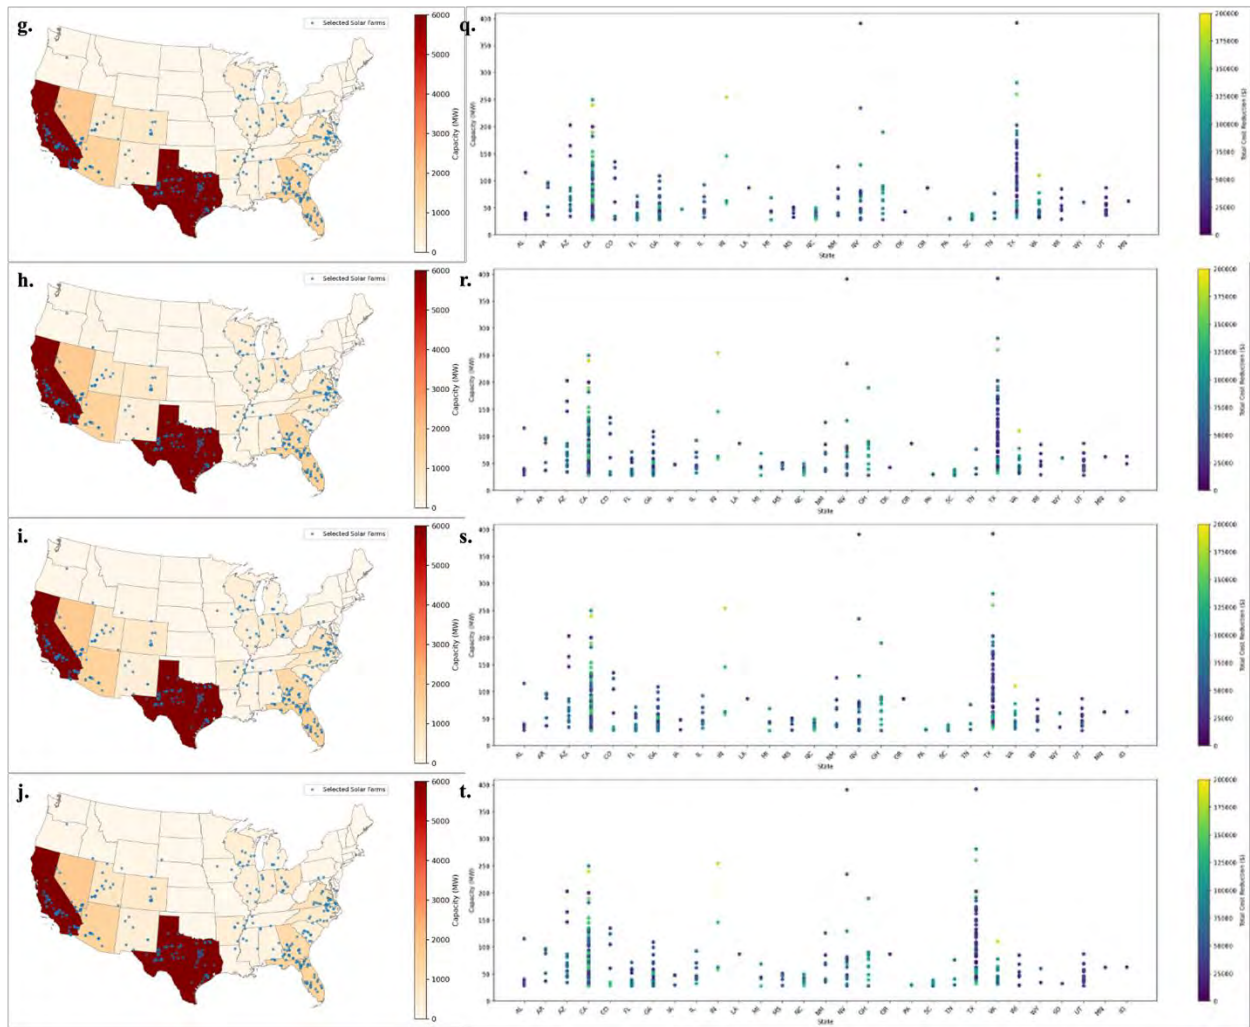

Figure 9 90% Solar farm selection across different flight market penetration rates

a-j, Spatial distribution of selected solar farms (blue dots); and the color of the states represents the total optimized solar capacity (MW). k-t, Scatter plot aggregates the relationship between individual solar farm capacity (MW) and total cost reduction (\$), colored by cost reduction magnitude; and each dot represents one farm, clustered by state.

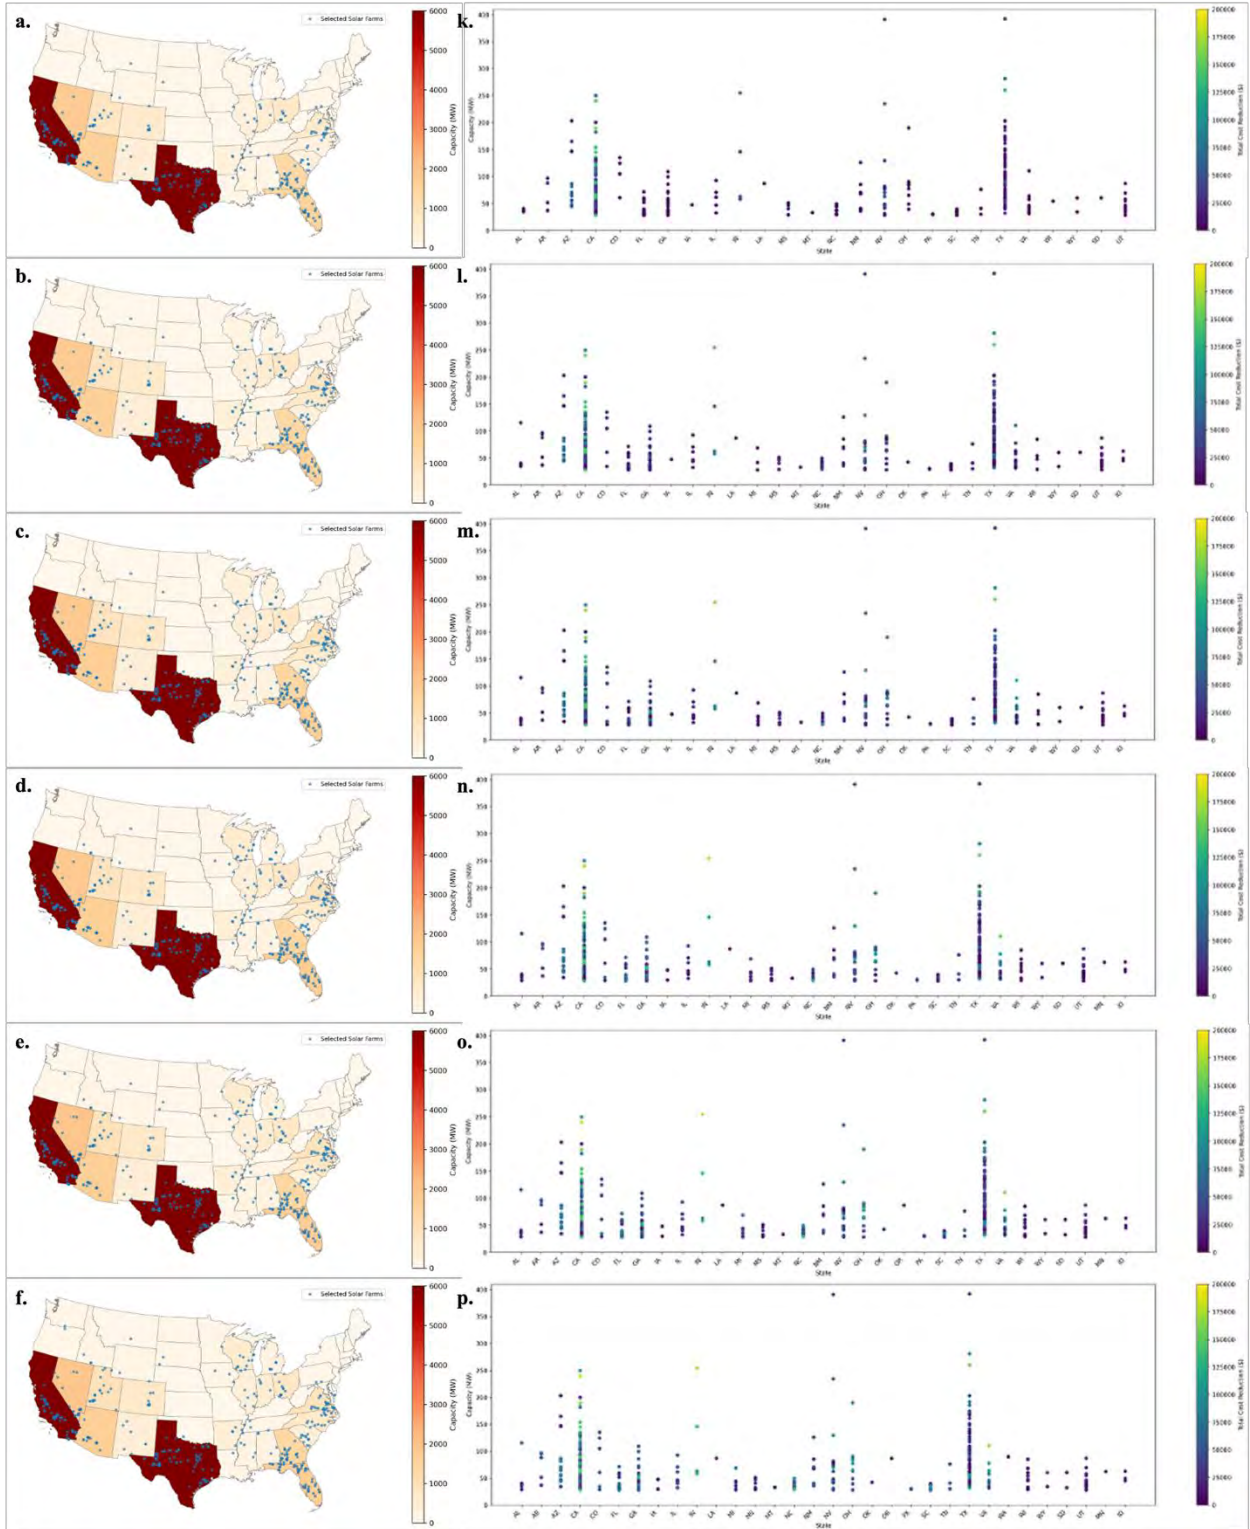

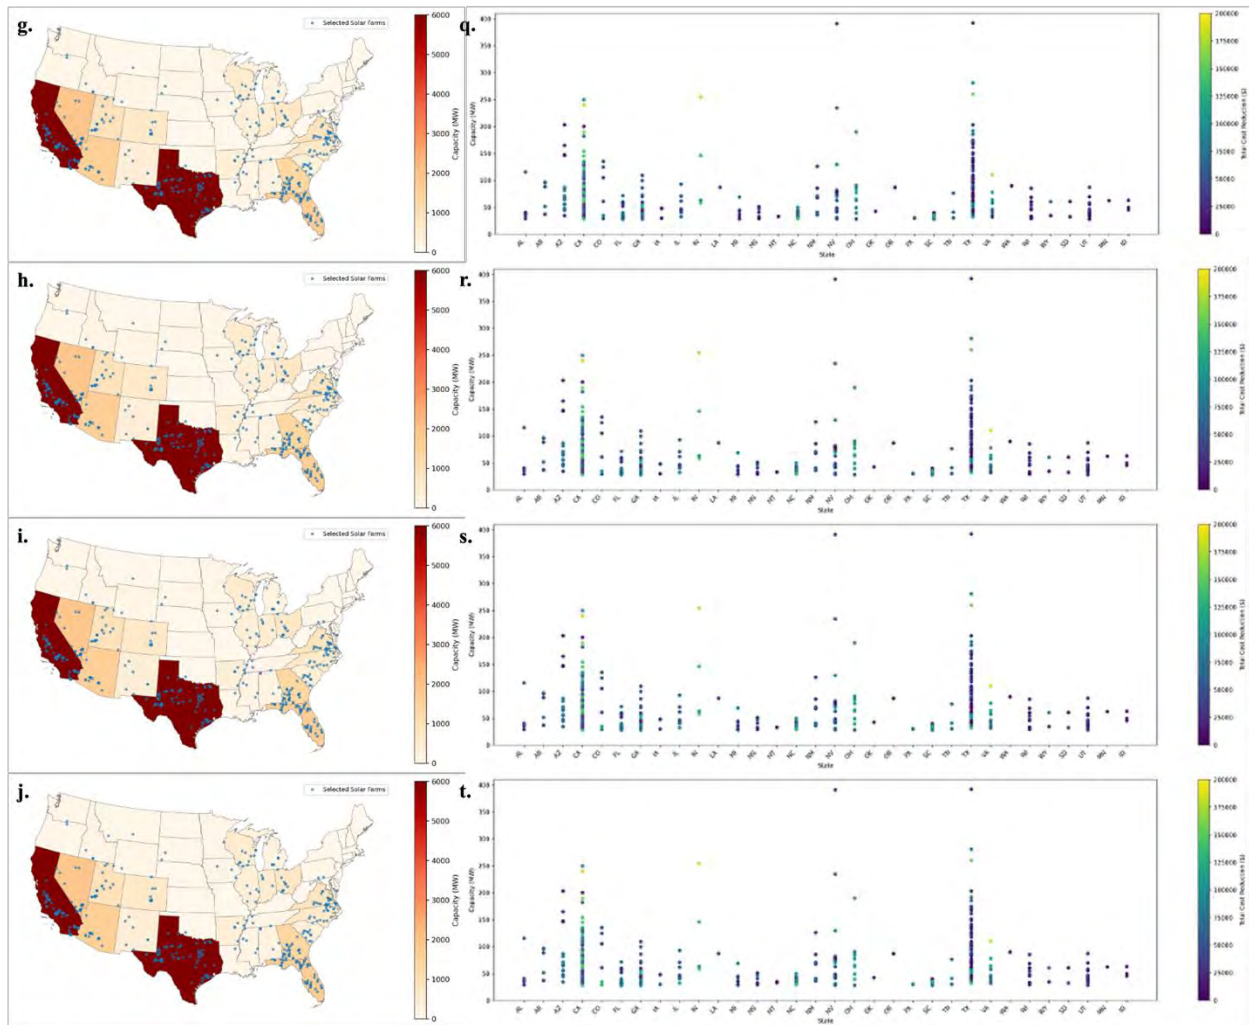

Figure 10 100% Solar farm selection across different flight market penetration rates

a-j, Spatial distribution of selected solar farms (blue dots); and the color of the states represents the total optimized solar capacity (MW). k-t, Scatter plot aggregates the relationship between individual solar farm capacity (MW) and total cost reduction (\$), colored by cost reduction magnitude; and each dot represents one farm, clustered by state.



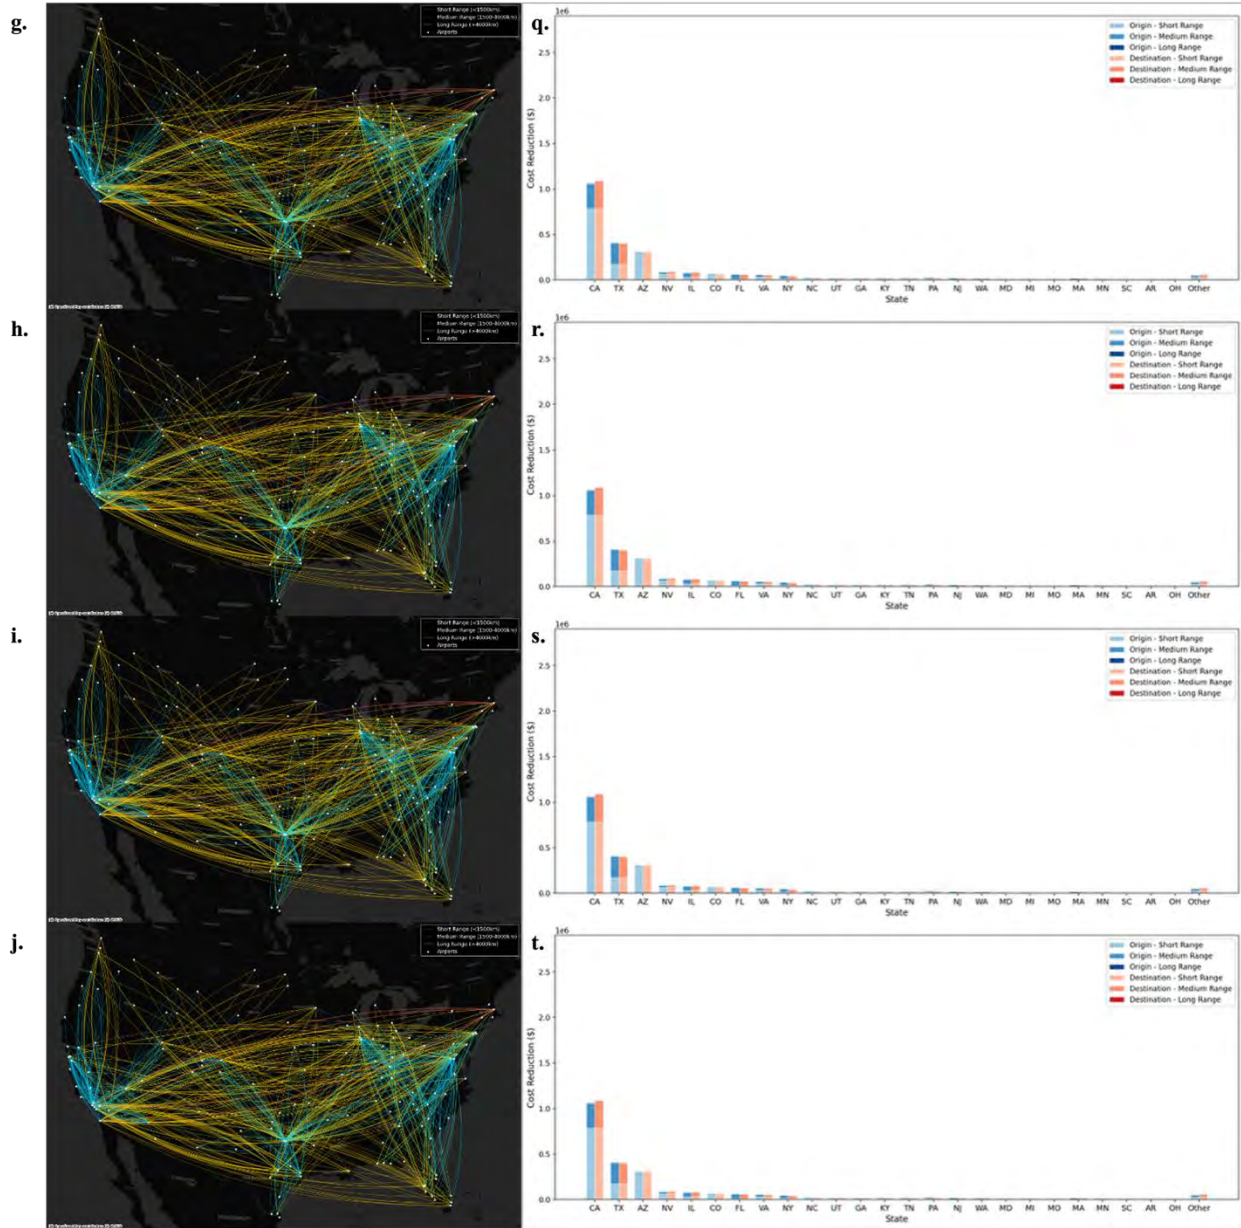

Figure 11 10% Flight selection across different solar farm market penetration rates

a-j, Spatial distribution of selected flights; each line represents a flight connection colored flight range categories: short-range (0-1,500 km, cyan), medium-range (1,500-4,000 km, yellow), and long-range (>4,000 km, magenta); and airports are shown as white points. k-t, State-level cost reductions aggregated by flight origin and destination states, with states ordered by total savings (\$); for each state, the left bar (blue shades) represents cost savings associated with flight origins, and the right bar (orange shades) represents savings associated with destinations; and bar segments are stacked by flight range category.

a.

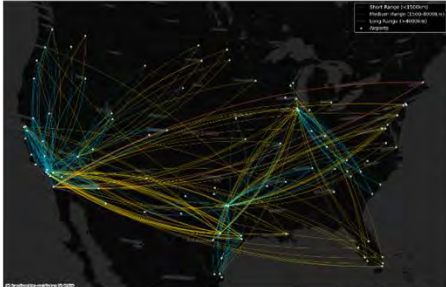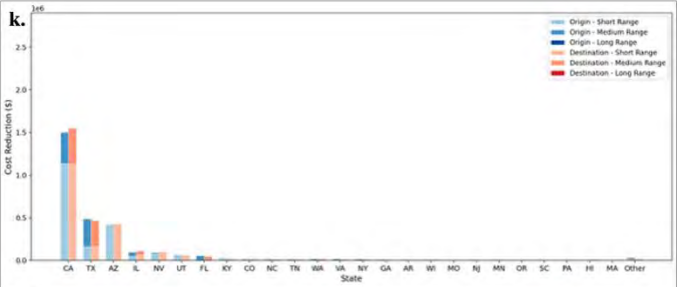

b.

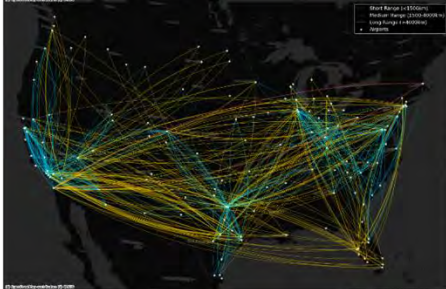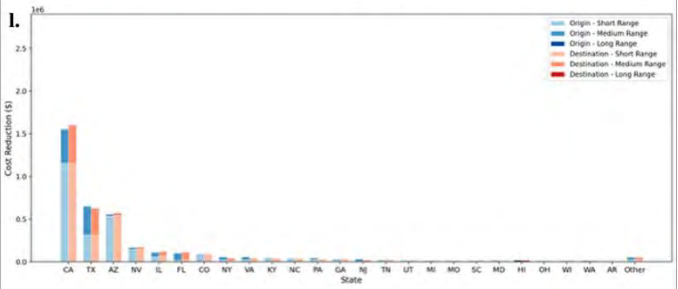

c.

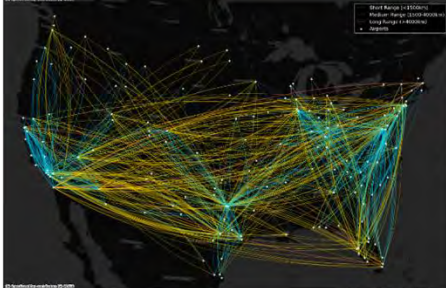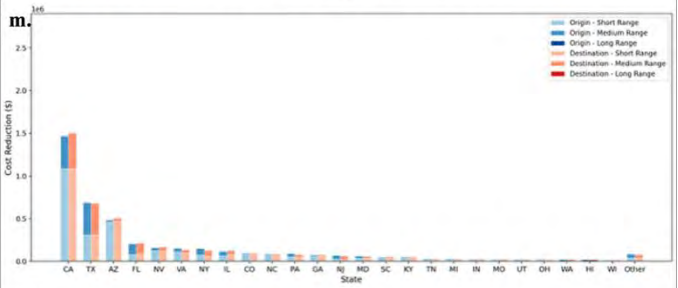

d.

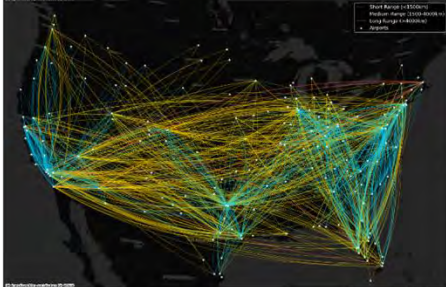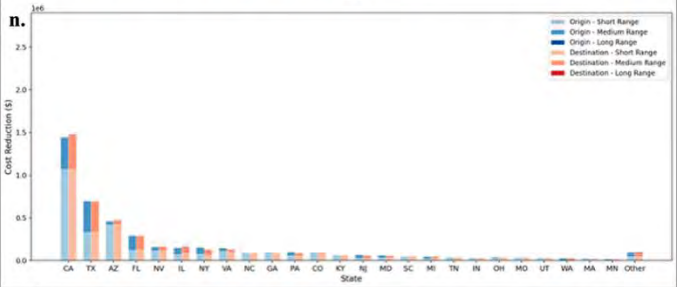

e.

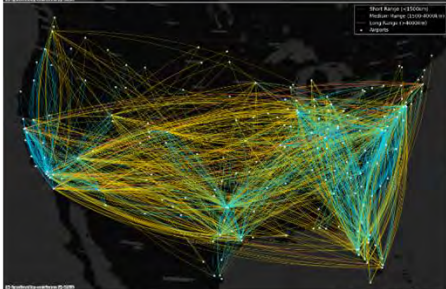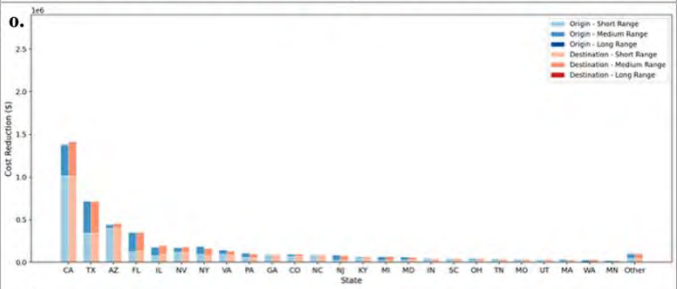

f.

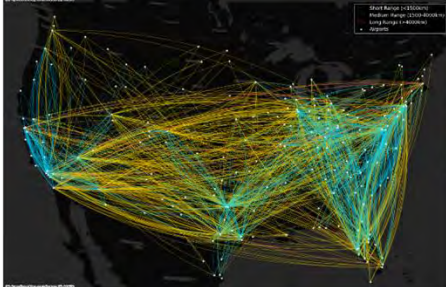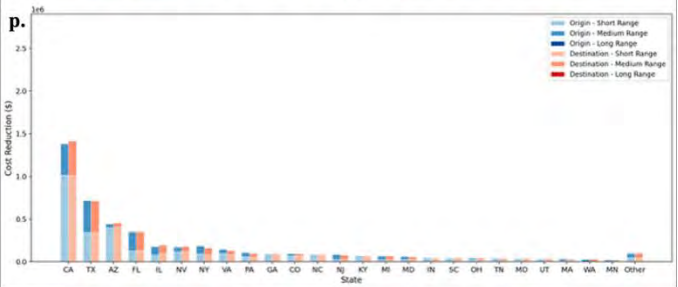

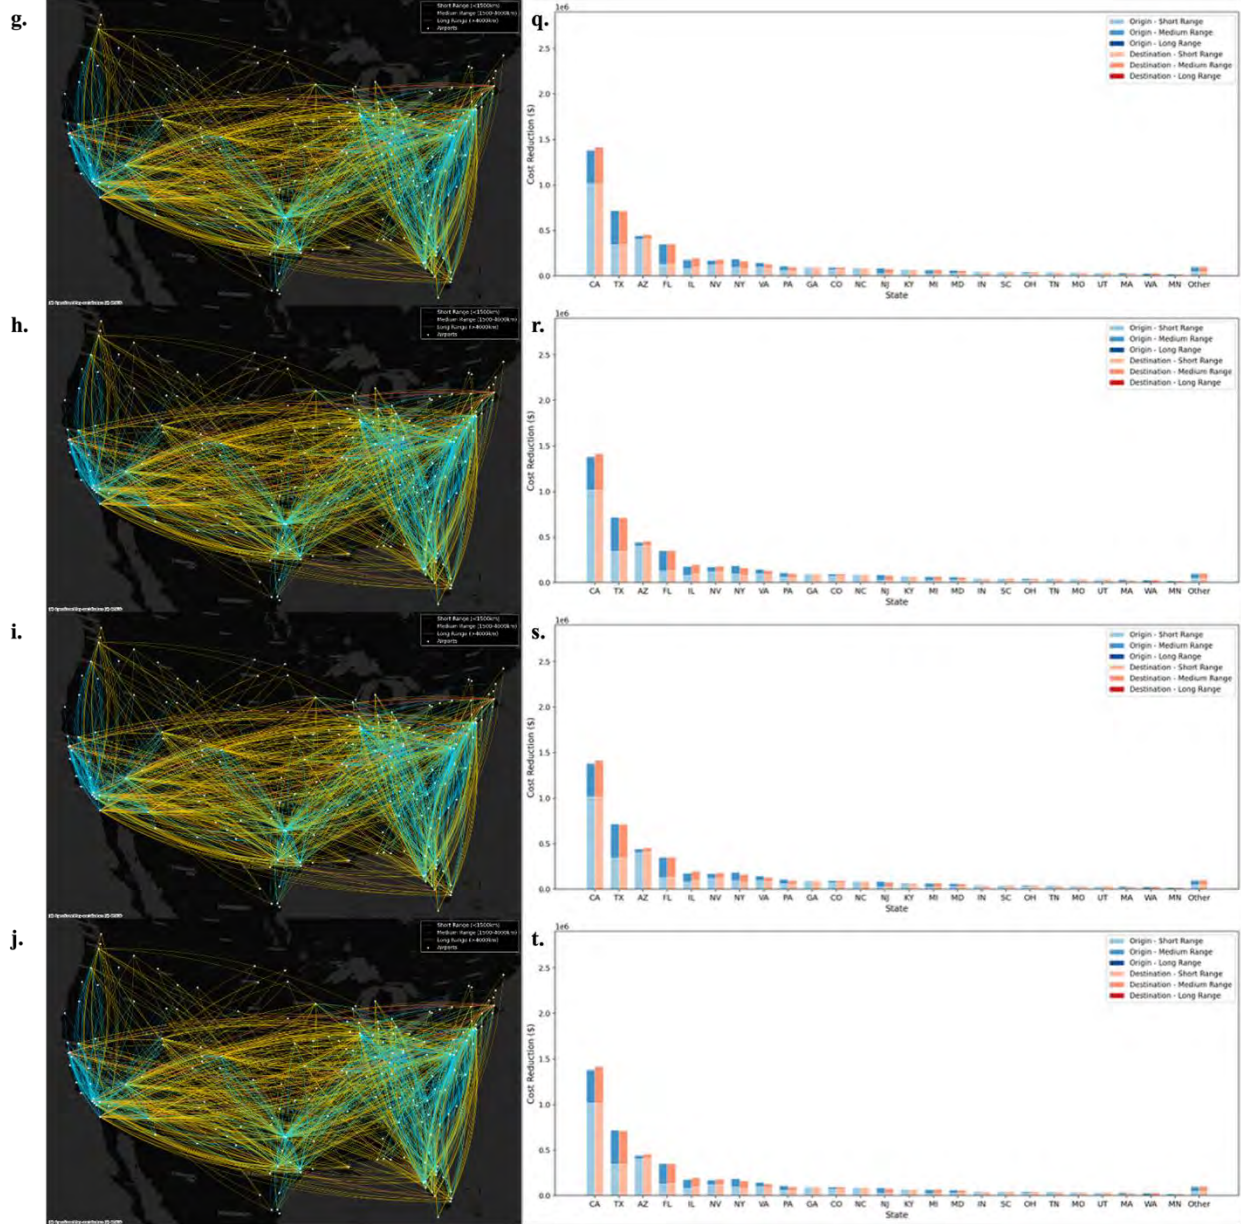

Figure 12 20% Flight selection across different solar farm market penetration rates

a-j, Spatial distribution of selected flights; each line represents a flight connection colored flight range categories: short-range (0-1,500 km, cyan), medium-range (1,500-4,000 km, yellow), and long-range (>4,000 km, magenta); and airports are shown as white points. k-t, State-level cost reductions aggregated by flight origin and destination states, with states ordered by total savings (\$); for each state, the left bar (blue shades) represents cost savings associated with flight origins, and the right bar (orange shades) represents savings associated with destinations; and bar segments are stacked by flight range category.

a.

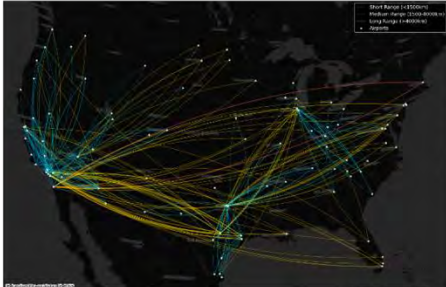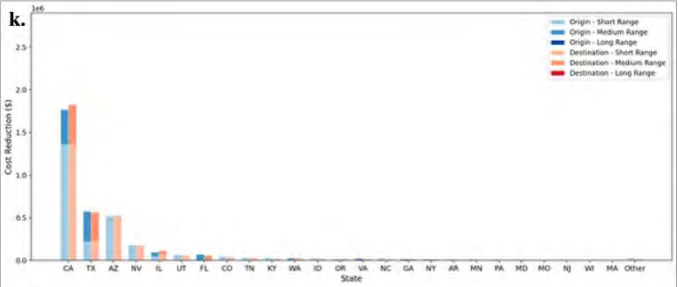

b.

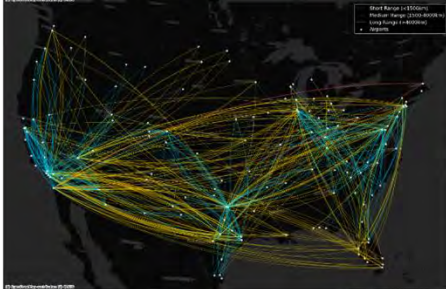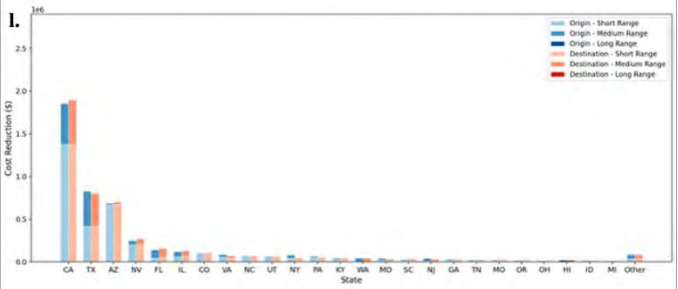

c.

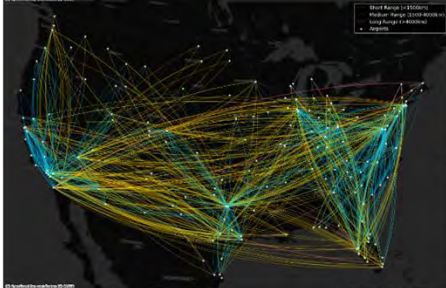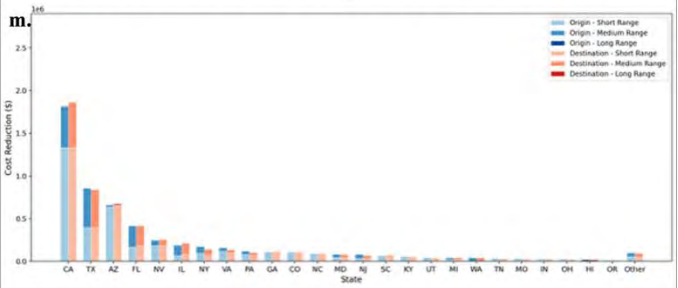

d.

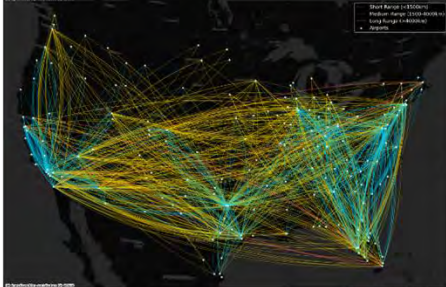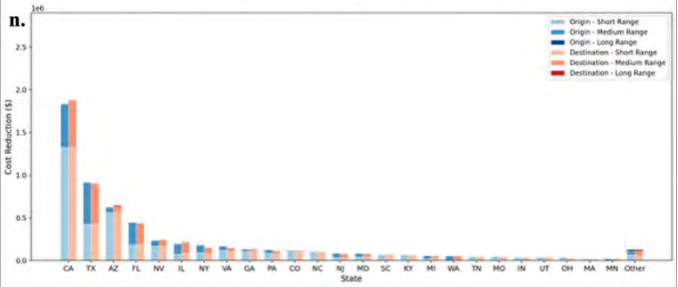

e.

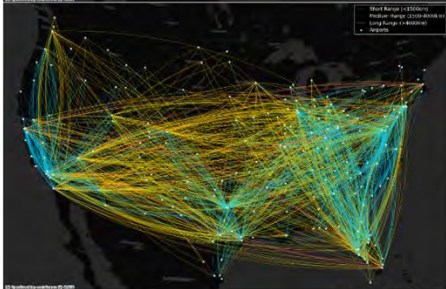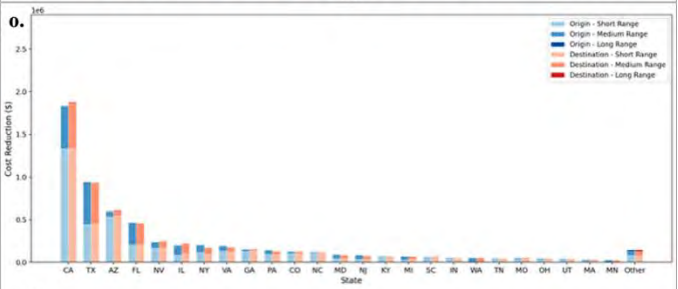

f.

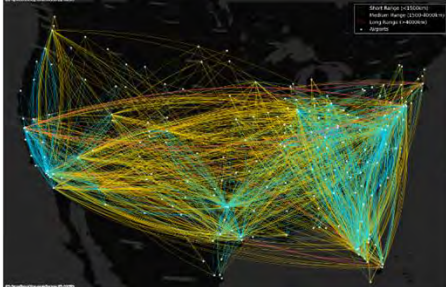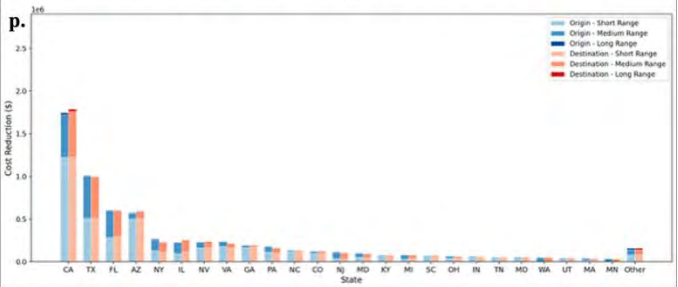

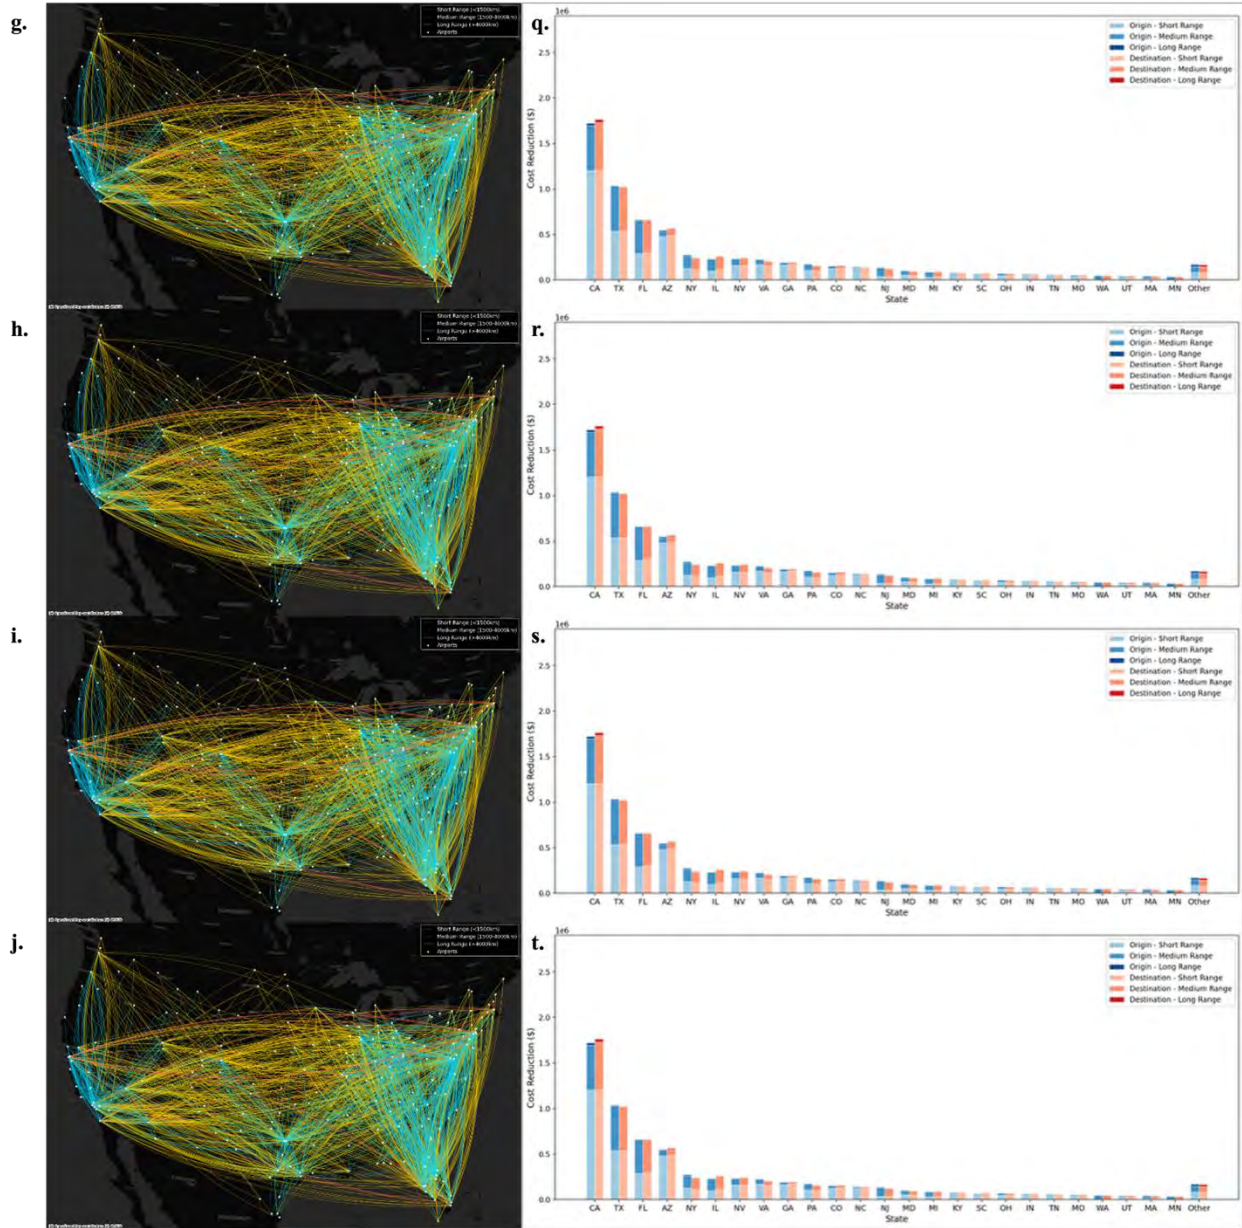

Figure 13 30% Flight selection across different solar farm market penetration rates

a-j, Spatial distribution of selected flights; each line represents a flight connection colored flight range categories: short-range (0-1,500 km, cyan), medium-range (1,500-4,000 km, yellow), and long-range (>4,000 km, magenta); and airports are shown as white points. k-t, State-level cost reductions aggregated by flight origin and destination states, with states ordered by total savings (\$); for each state, the left bar (blue shades) represents cost savings associated with flight origins, and the right bar (orange shades) represents savings associated with destinations; and bar segments are stacked by flight range category.

a.

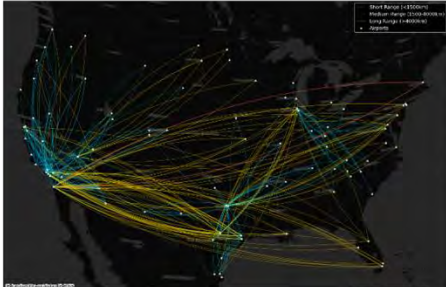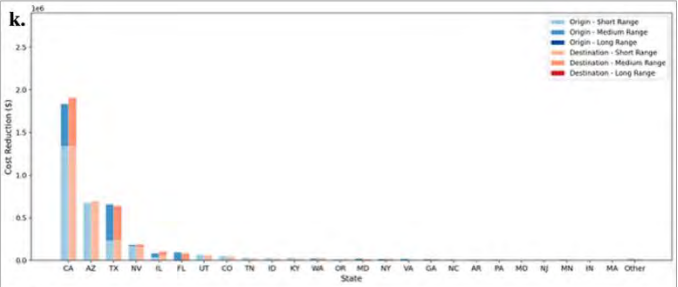

b.

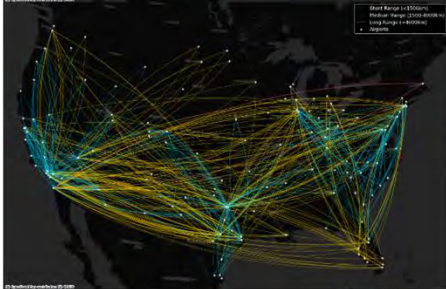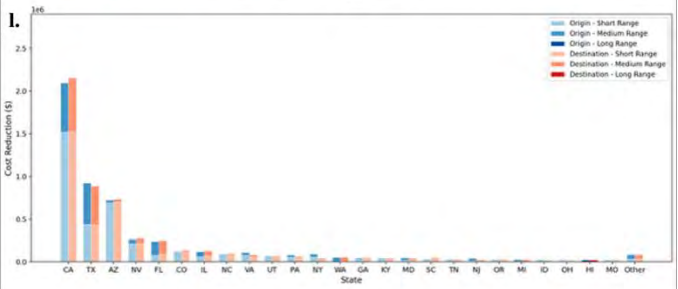

c.

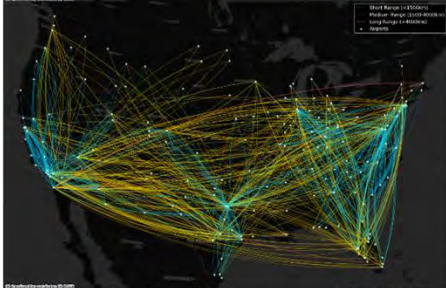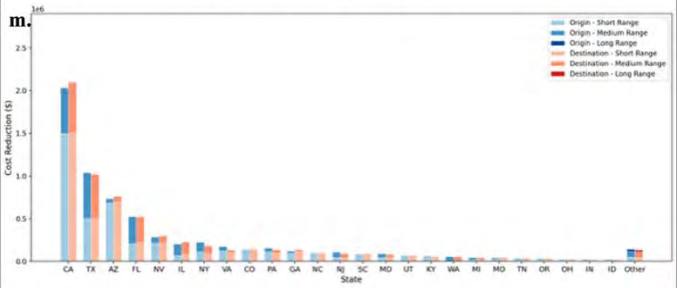

d.

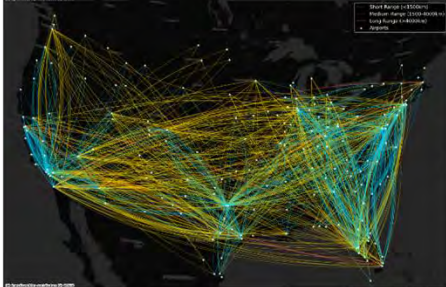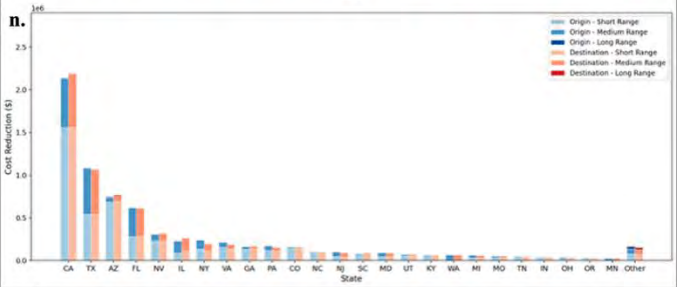

e.

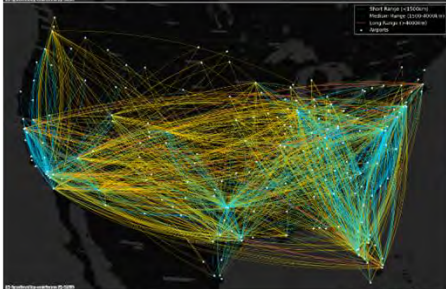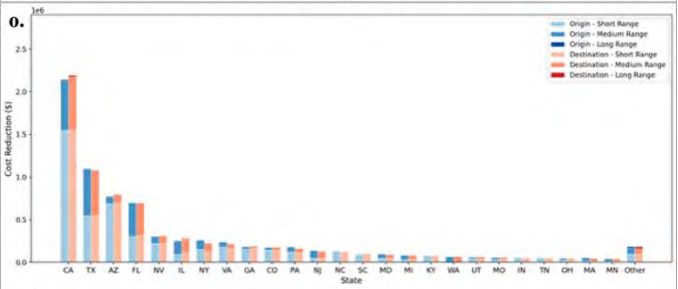

f.

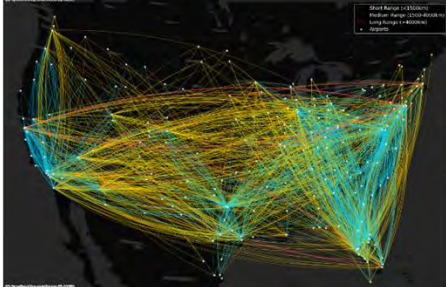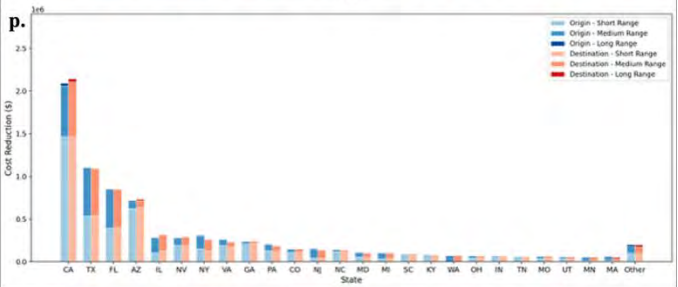

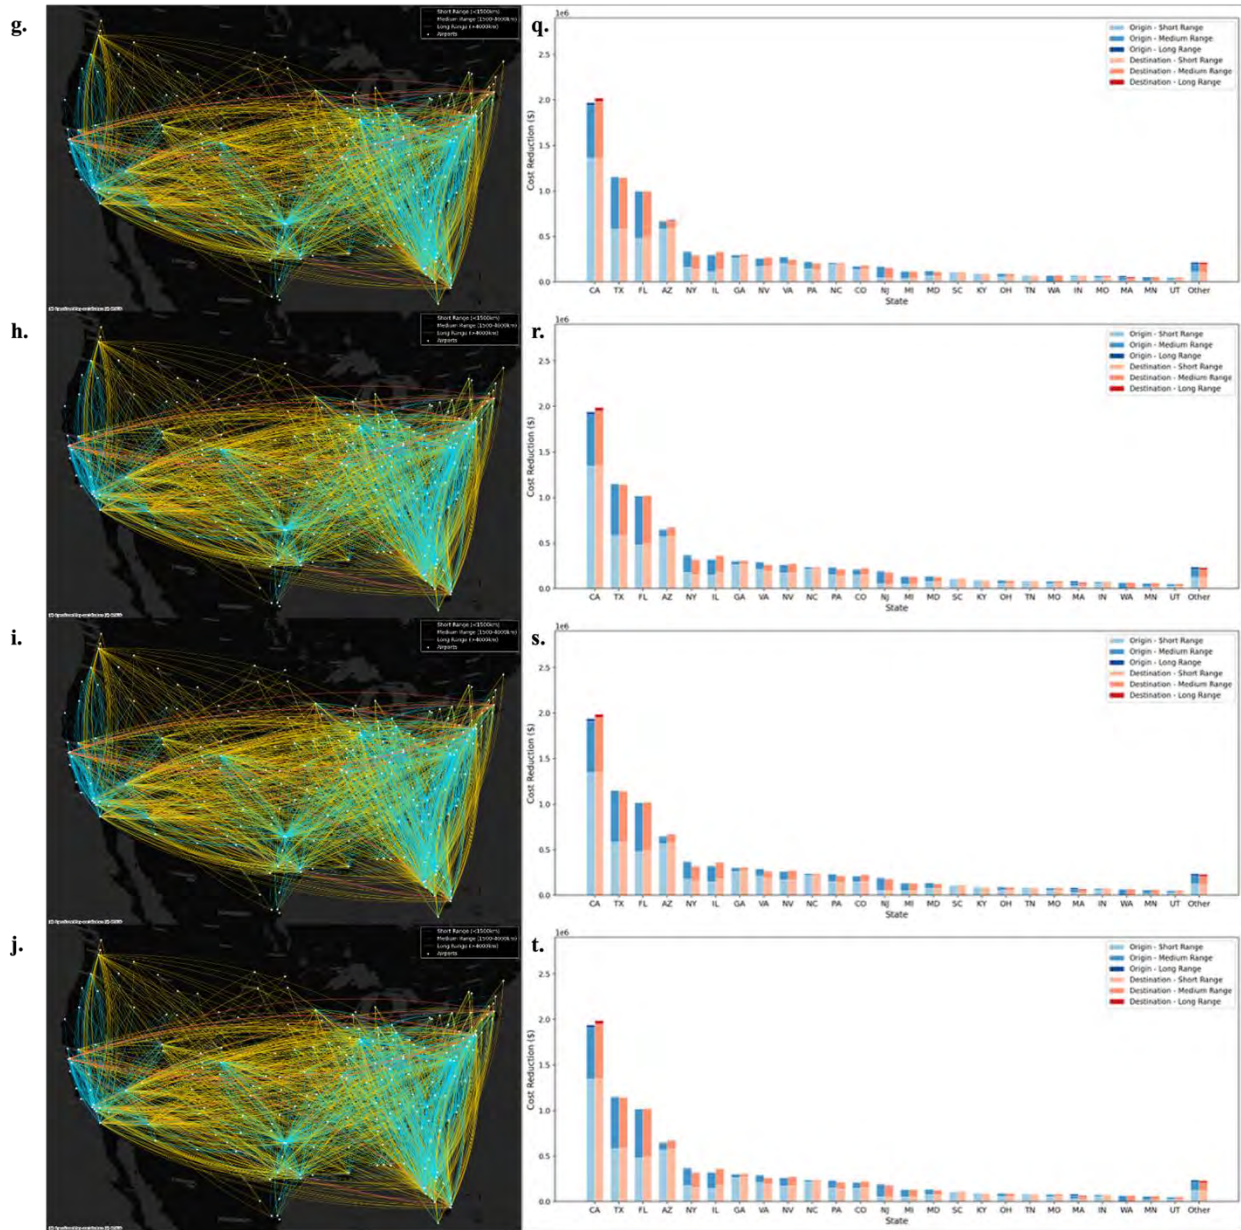

Figure 14 40% Flight selection across different solar farm market penetration rates

a-j, Spatial distribution of selected flights; each line represents a flight connection colored flight range categories: short-range (0-1,500 km, cyan), medium-range (1,500-4,000 km, yellow), and long-range (>4,000 km, magenta); and airports are shown as white points. k-t, State-level cost reductions aggregated by flight origin and destination states, with states ordered by total savings (\$); for each state, the left bar (blue shades) represents cost savings associated with flight origins, and the right bar (orange shades) represents savings associated with destinations; and bar segments are stacked by flight range category.

a.

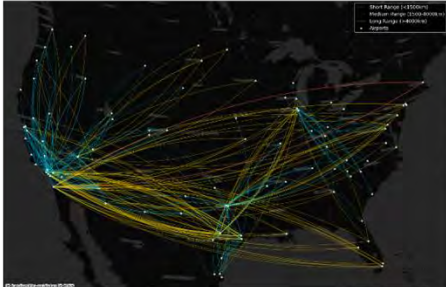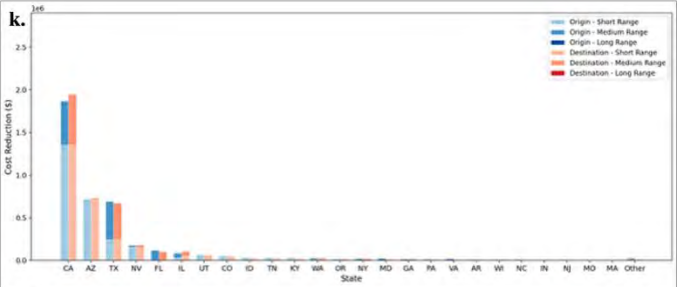

b.

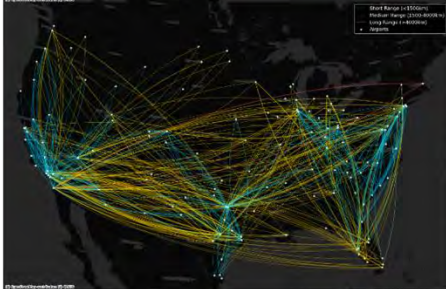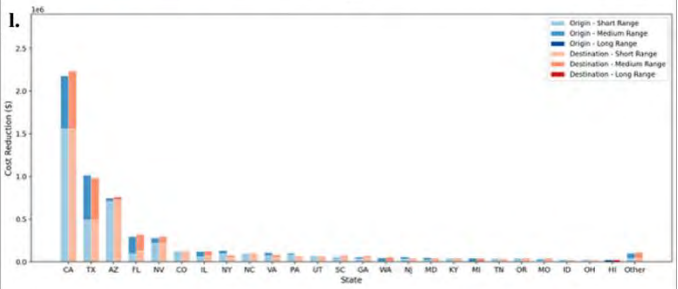

c.

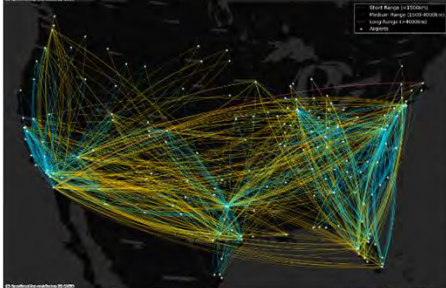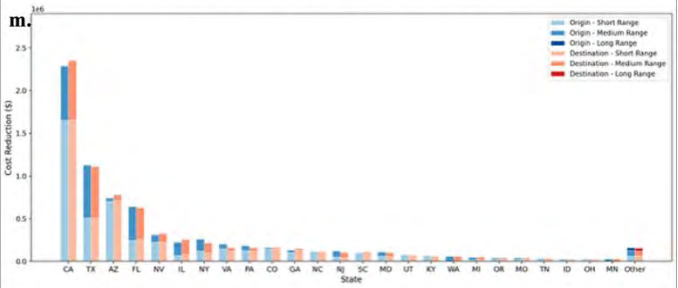

d.

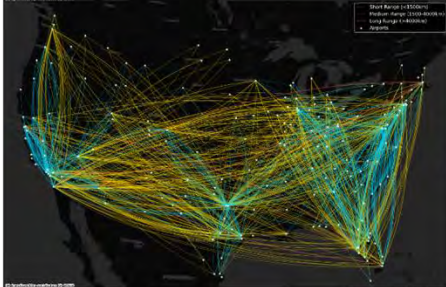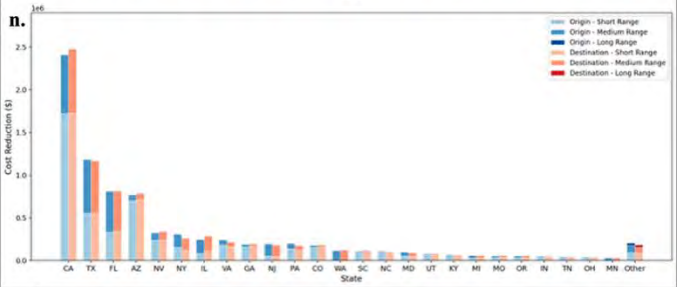

e.

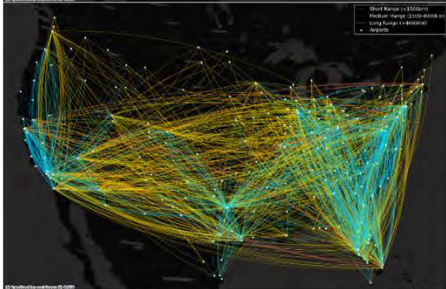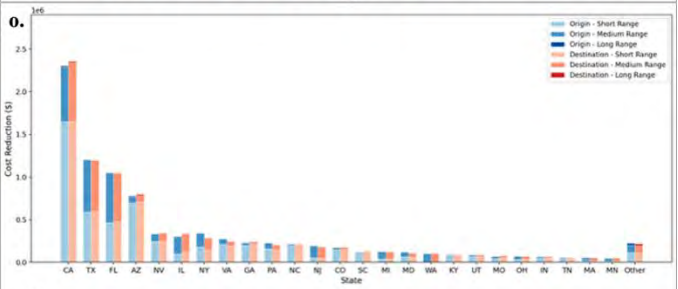

f.

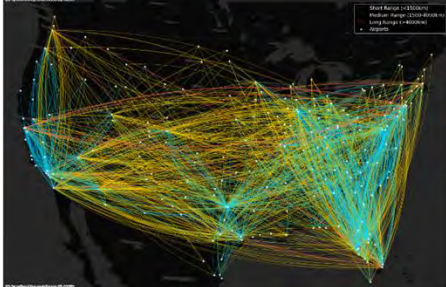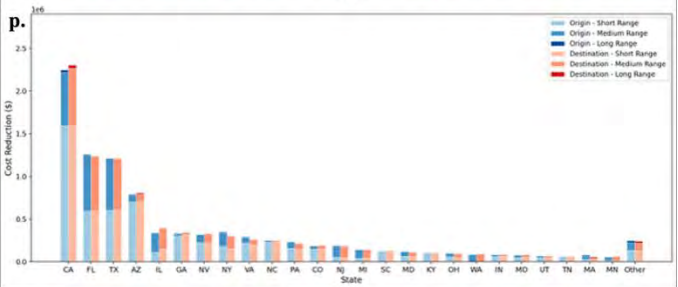

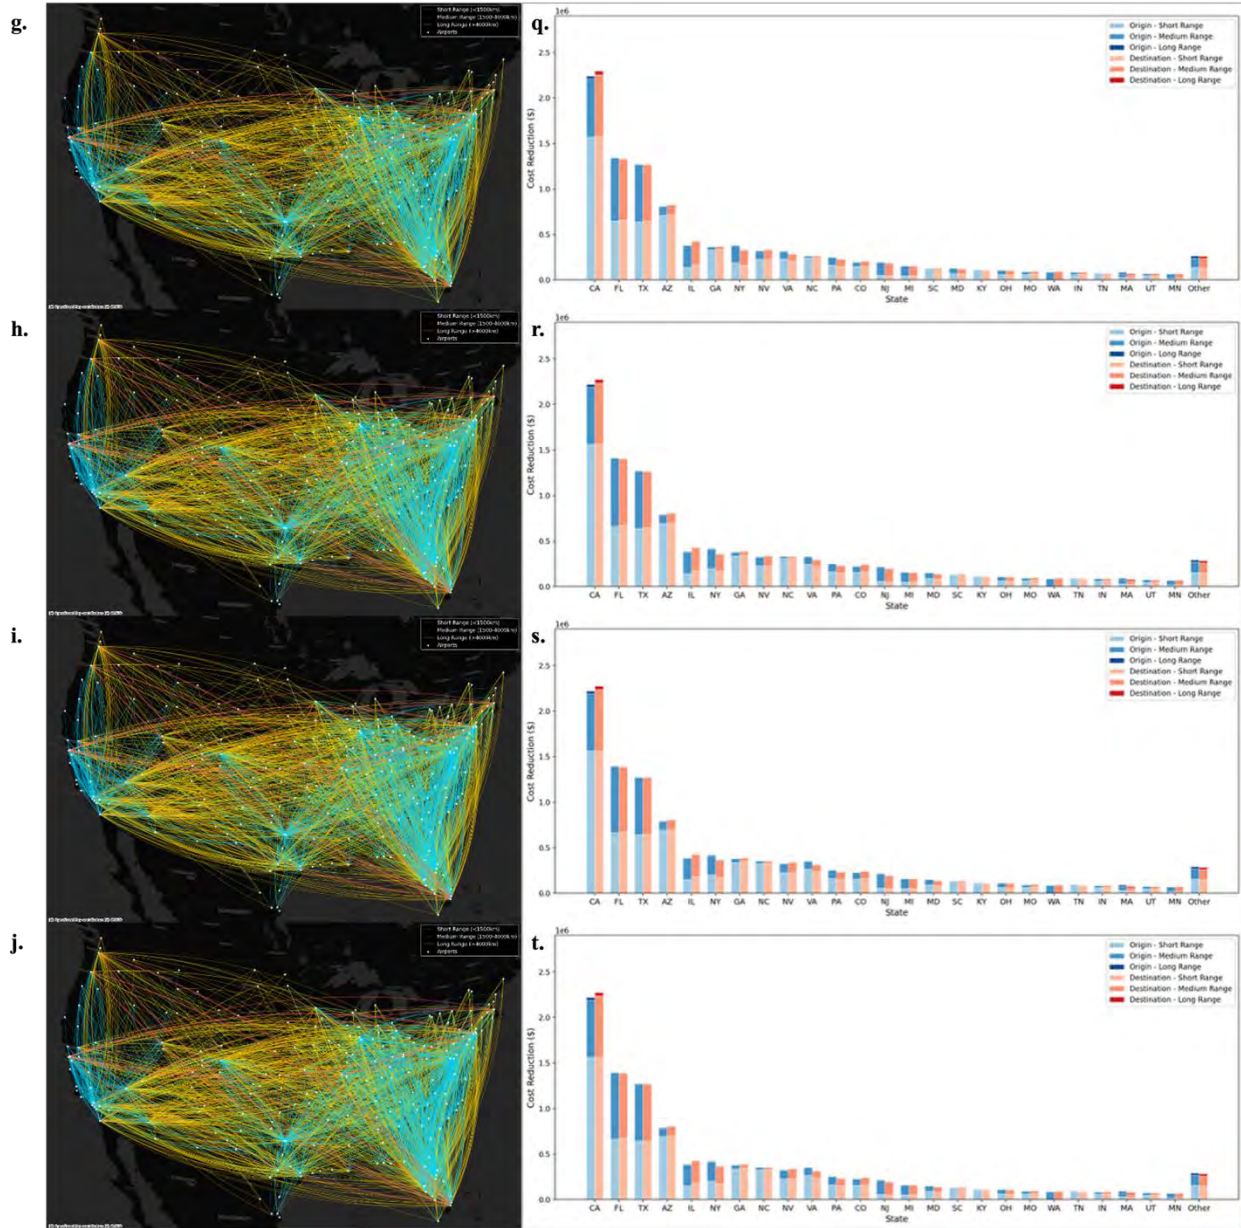

Figure 15 50% Flight selection across different solar farm market penetration rates

a-j, Spatial distribution of selected flights; each line represents a flight connection colored flight range categories: short-range (0-1,500 km, cyan), medium-range (1,500-4,000 km, yellow), and long-range (>4,000 km, magenta); and airports are shown as white points. k-t, State-level cost reductions aggregated by flight origin and destination states, with states ordered by total savings (\$); for each state, the left bar (blue shades) represents cost savings associated with flight origins, and the right bar (orange shades) represents savings associated with destinations; and bar segments are stacked by flight range category.

a.

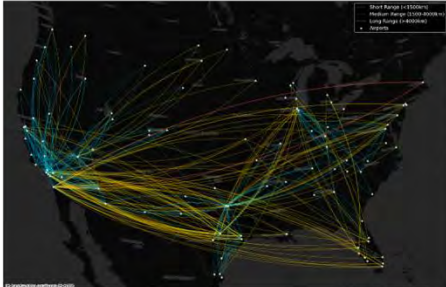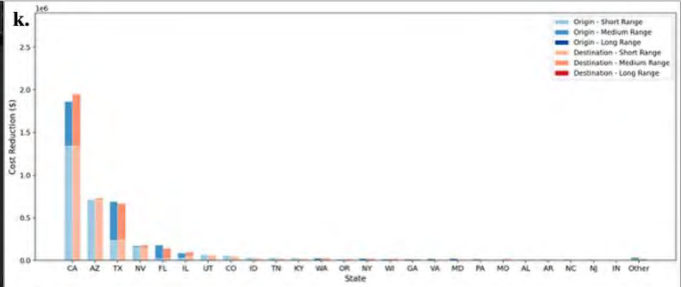

b.

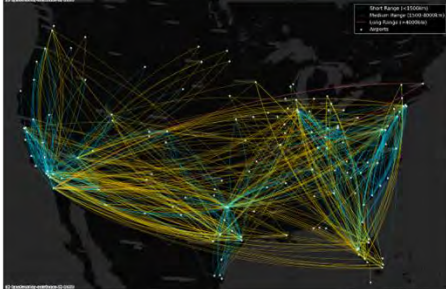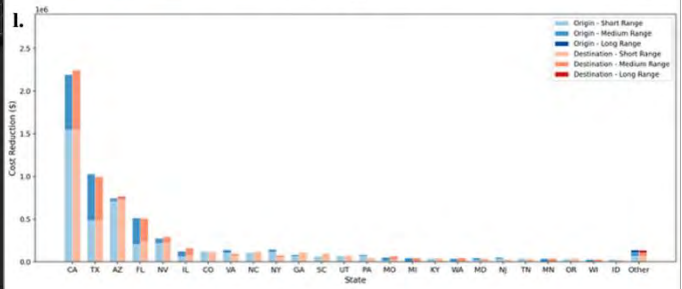

c.

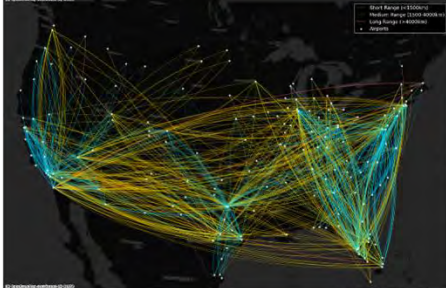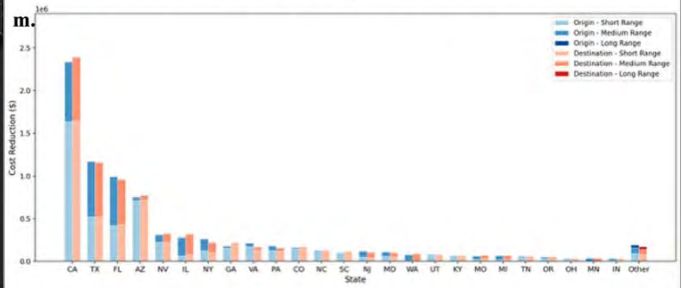

d.

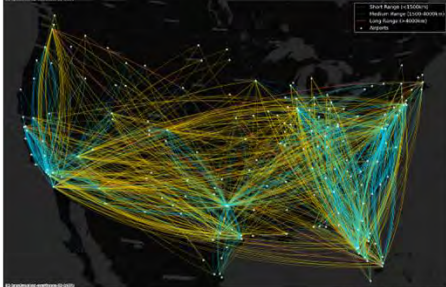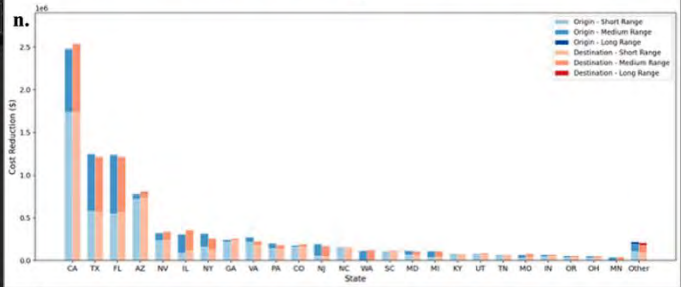

e.

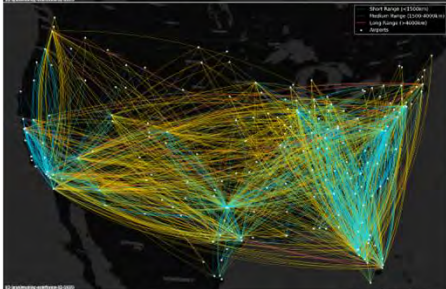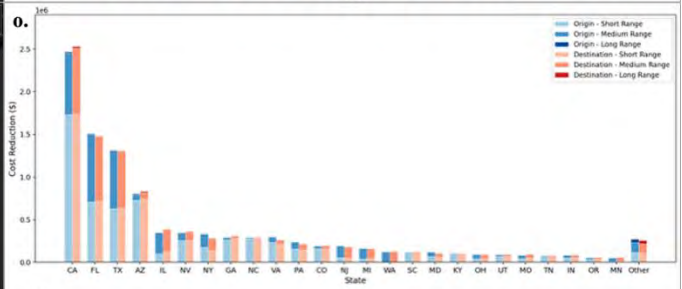

f.

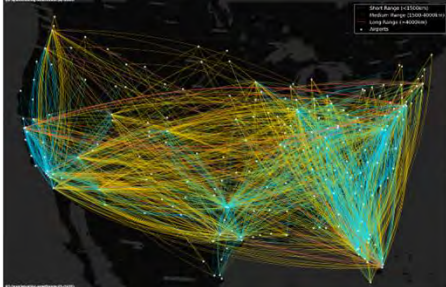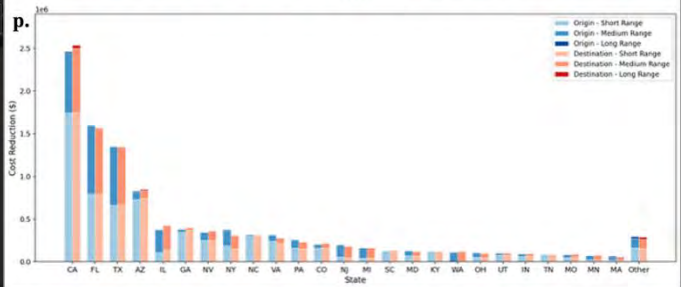

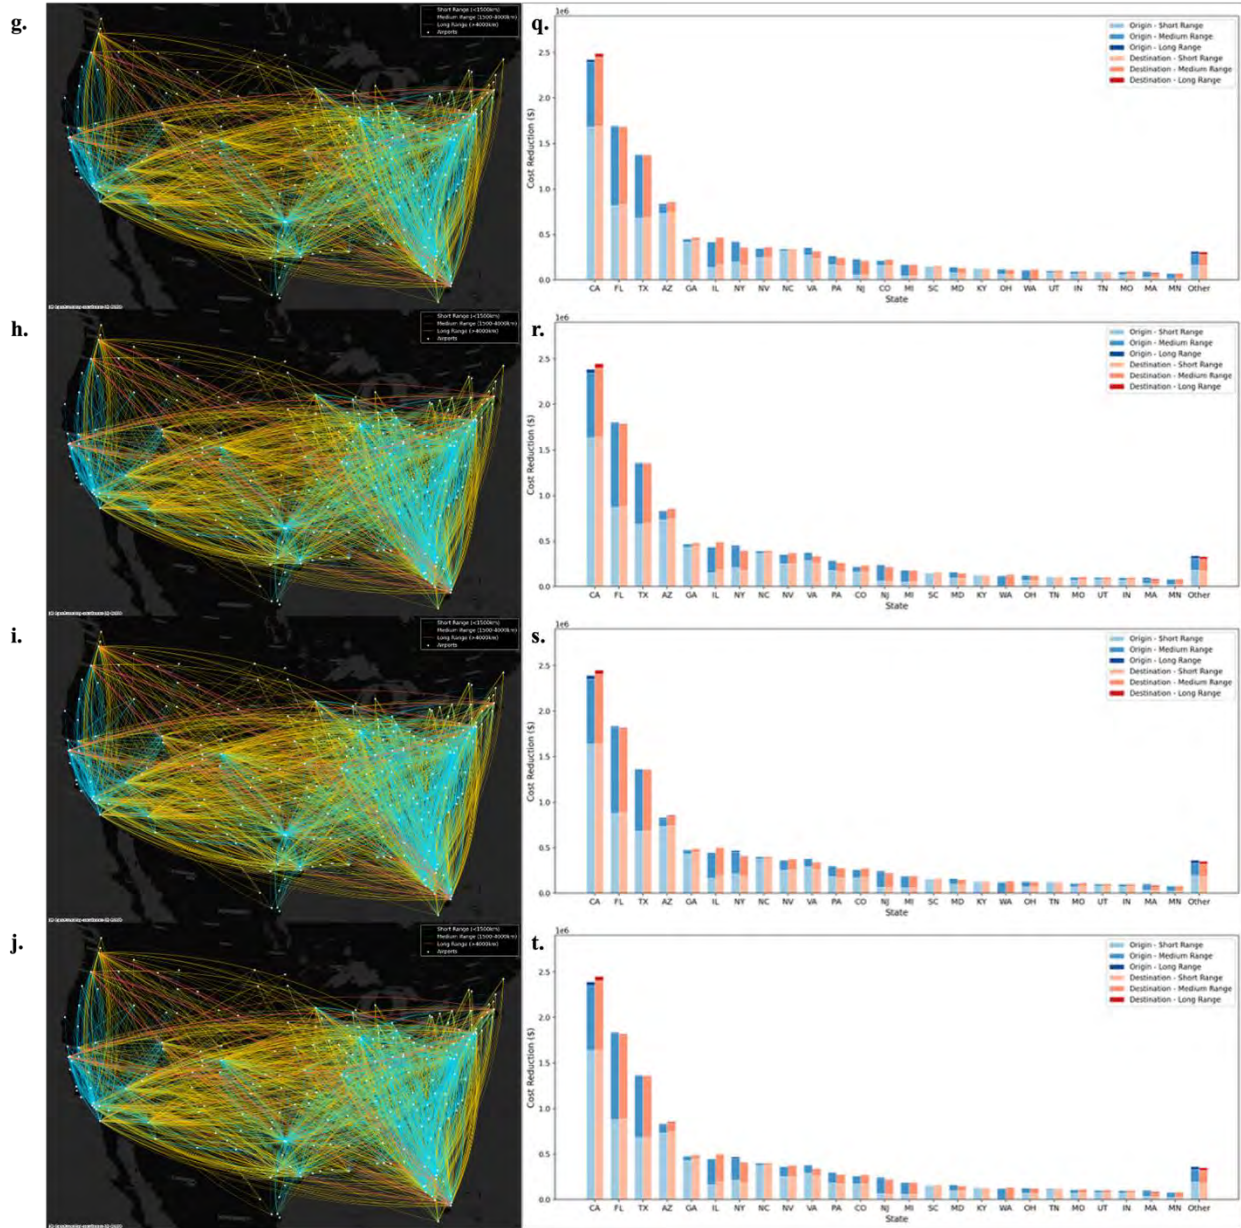

Figure 16 60% Flight selection across different solar farm market penetration rates

a-j, Spatial distribution of selected flights; each line represents a flight connection colored flight range categories: short-range (0-1,500 km, cyan), medium-range (1,500-4,000 km, yellow), and long-range (>4,000 km, magenta); and airports are shown as white points. k-t, State-level cost reductions aggregated by flight origin and destination states, with states ordered by total savings (\$); for each state, the left bar (blue shades) represents cost savings associated with flight origins, and the right bar (orange shades) represents savings associated with destinations; and bar segments are stacked by flight range category.

a.

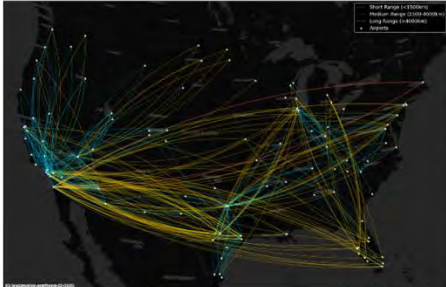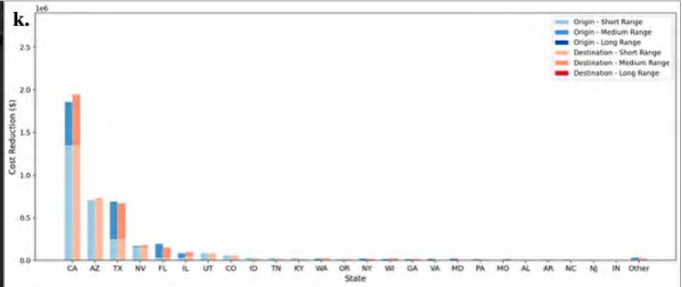

b.

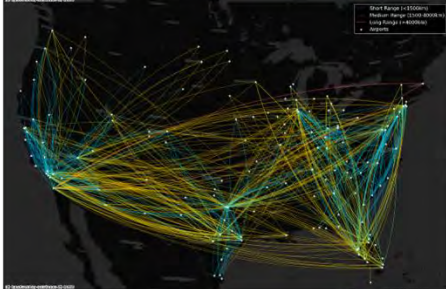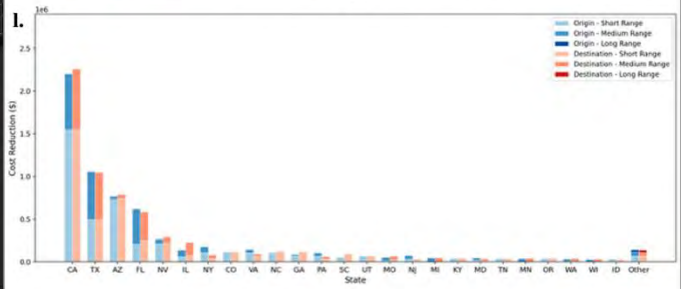

c.

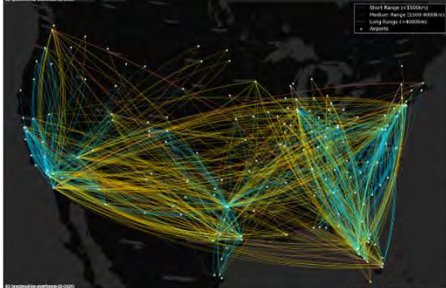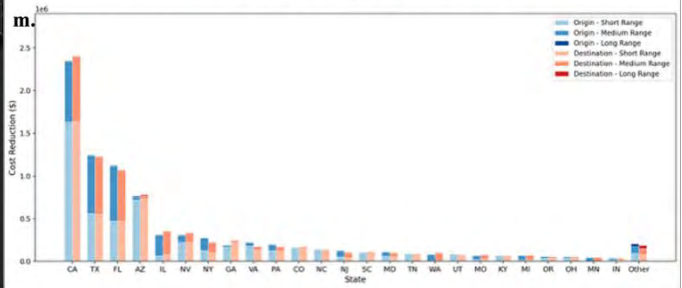

d.

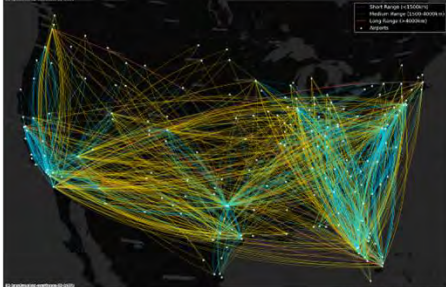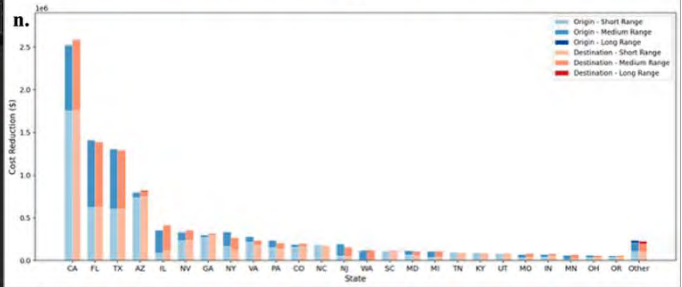

e.

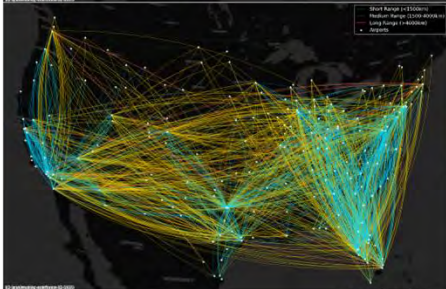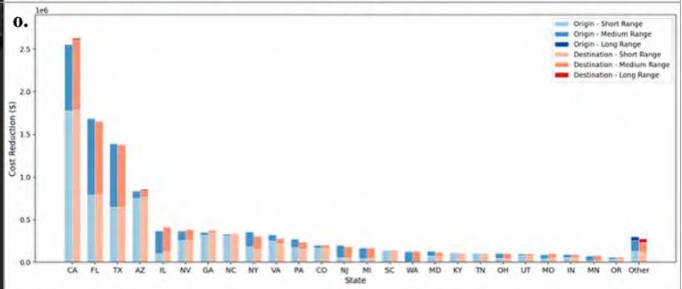

f.

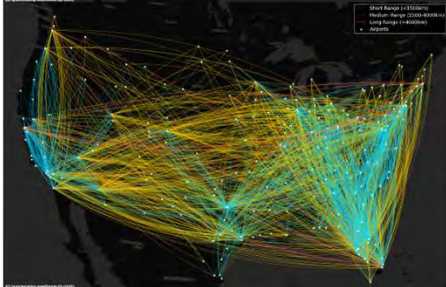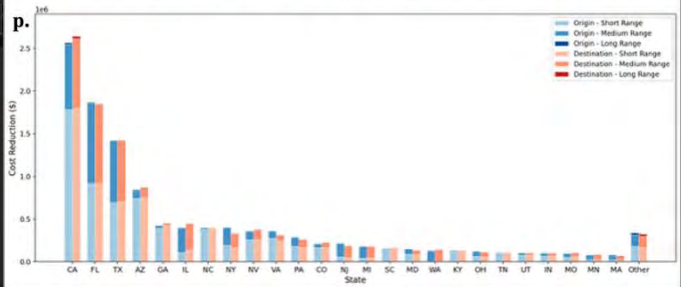

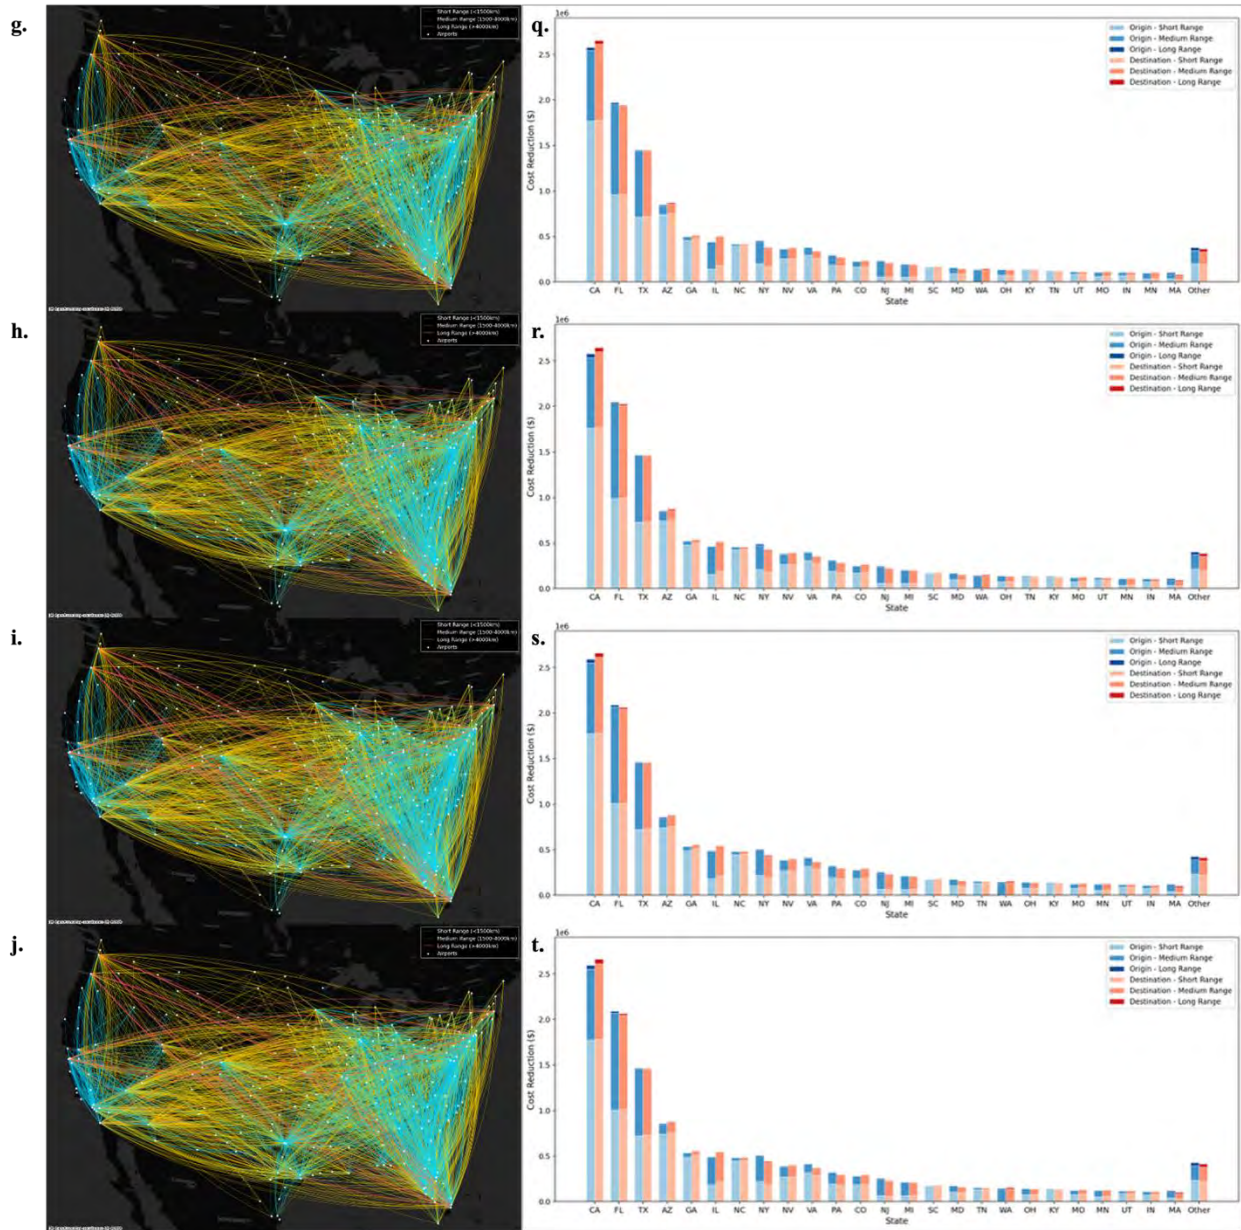

Figure 17 70% Flight selection across different solar farm market penetration rates

a-j, Spatial distribution of selected flights; each line represents a flight connection colored flight range categories: short-range (0-1,500 km, cyan), medium-range (1,500-4,000 km, yellow), and long-range (>4,000 km, magenta); and airports are shown as white points. k-t, State-level cost reductions aggregated by flight origin and destination states, with states ordered by total savings (\$); for each state, the left bar (blue shades) represents cost savings associated with flight origins, and the right bar (orange shades) represents savings associated with destinations; and bar segments are stacked by flight range category.

a.

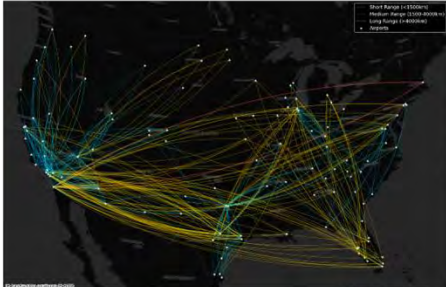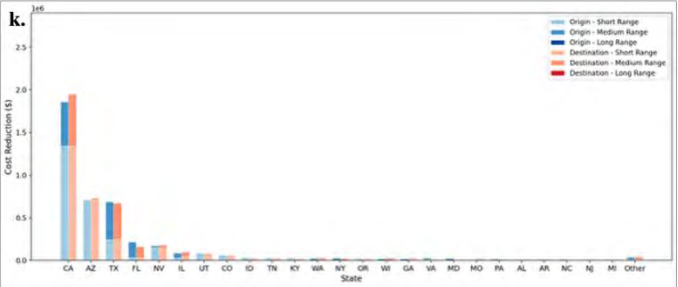

b.

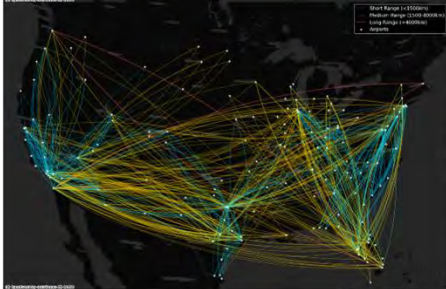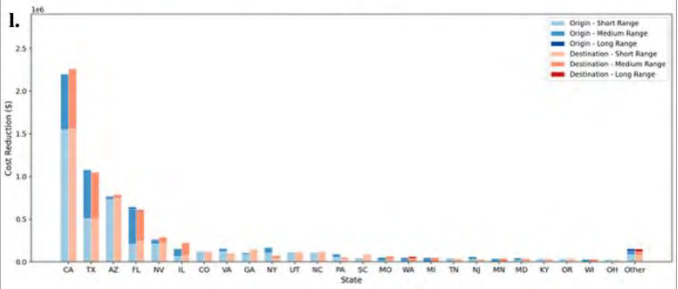

c.

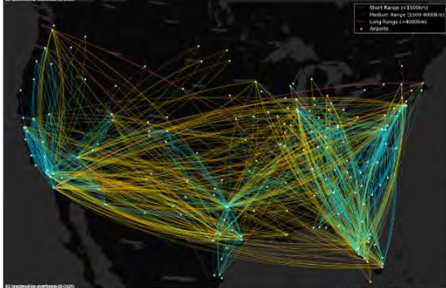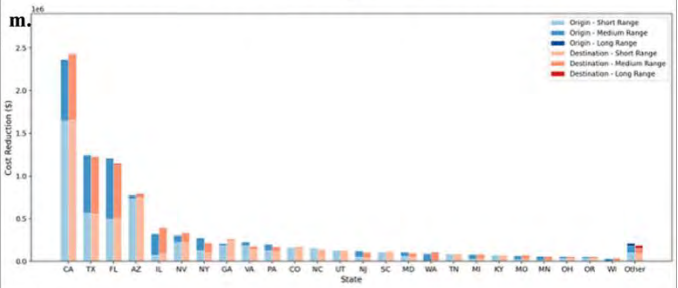

d.

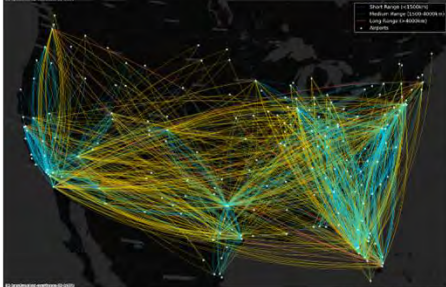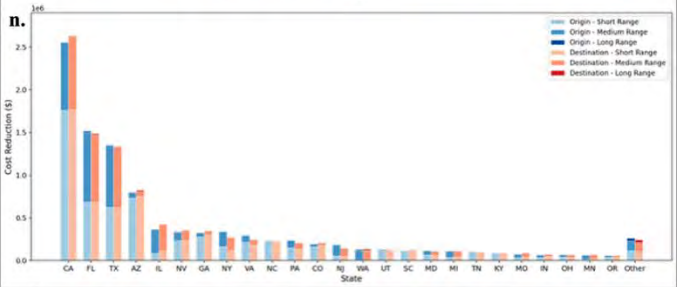

e.

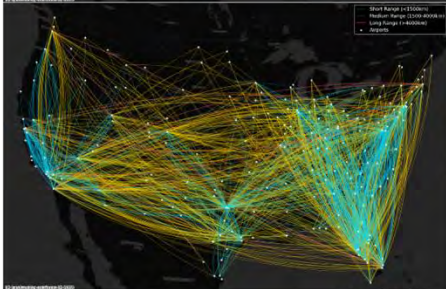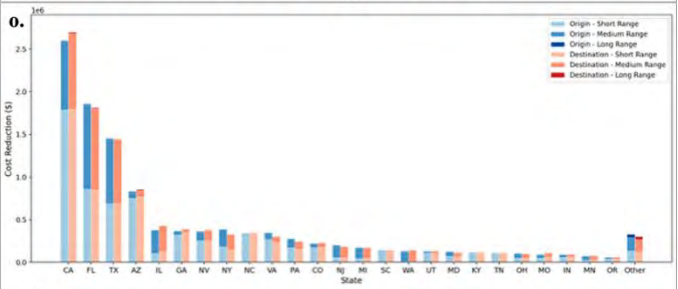

f.

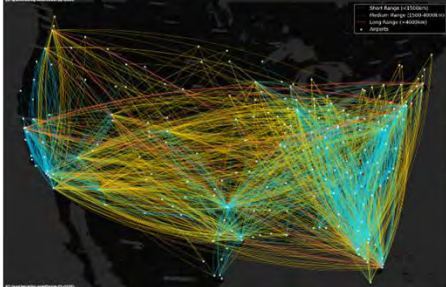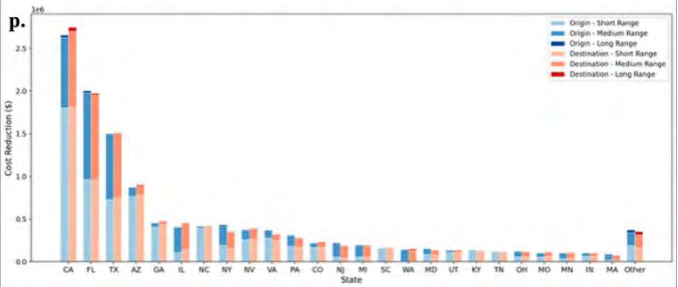

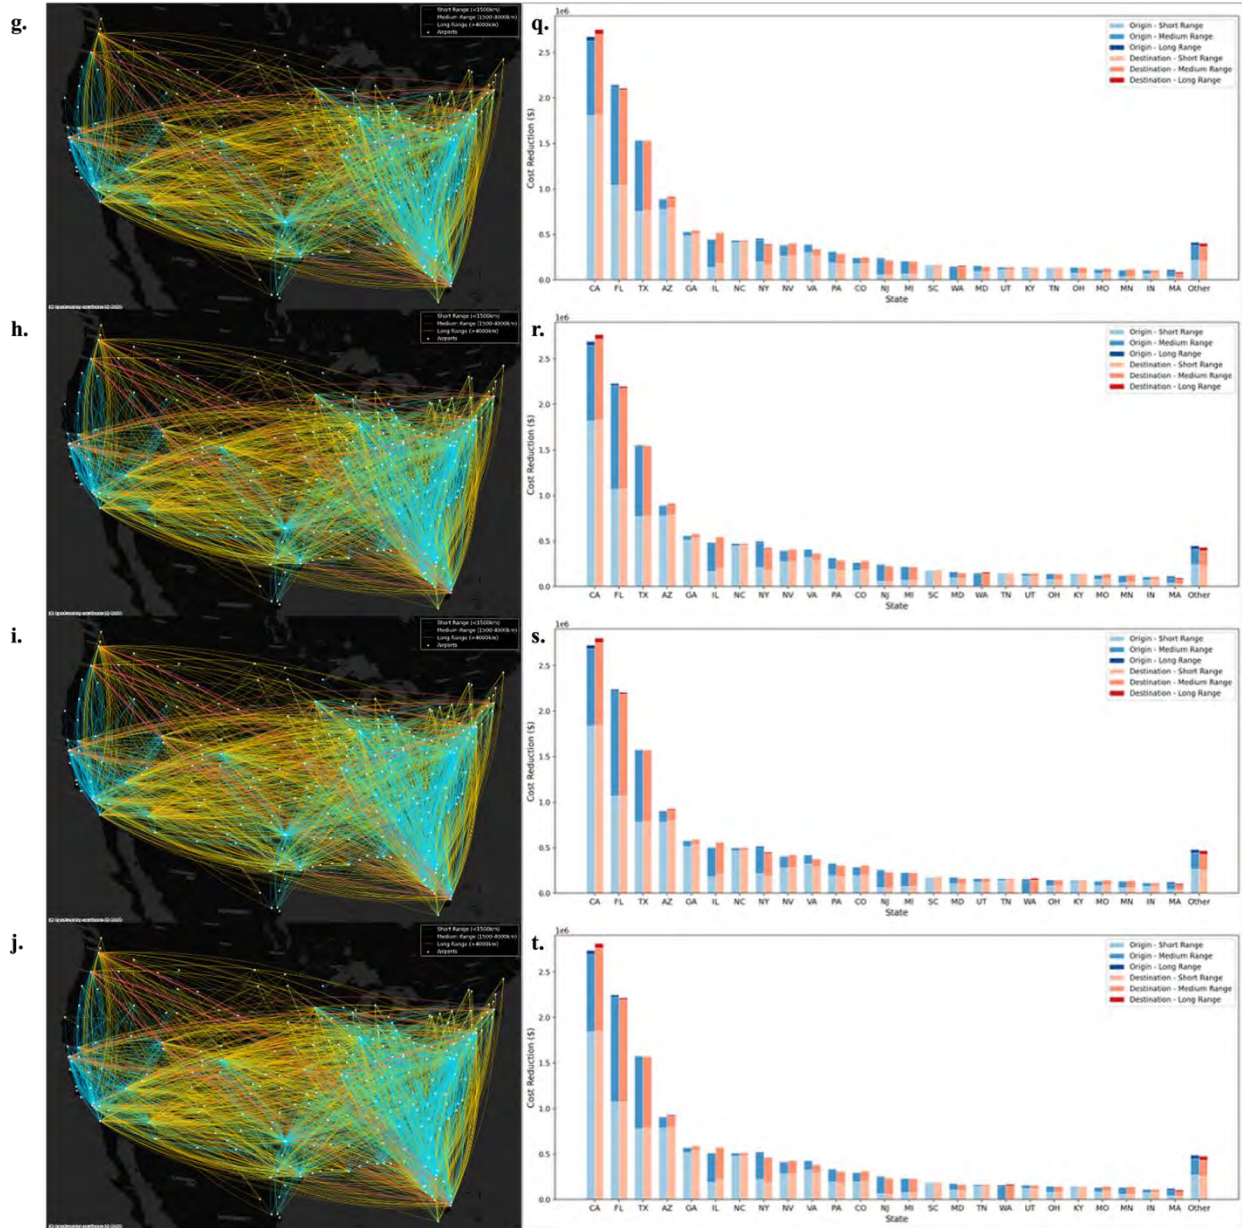

Figure 18 80% Flight selection across different solar farm market penetration rates

a-j, Spatial distribution of selected flights; each line represents a flight connection colored flight range categories: short-range (0-1,500 km, cyan), medium-range (1,500-4,000 km, yellow), and long-range (>4,000 km, magenta); and airports are shown as white points. k-t, State-level cost reductions aggregated by flight origin and destination states, with states ordered by total savings (\$); for each state, the left bar (blue shades) represents cost savings associated with flight origins, and the right bar (orange shades) represents savings associated with destinations; and bar segments are stacked by flight range category.

a.

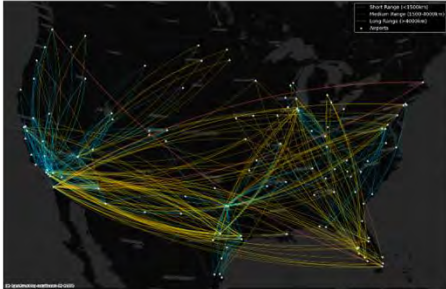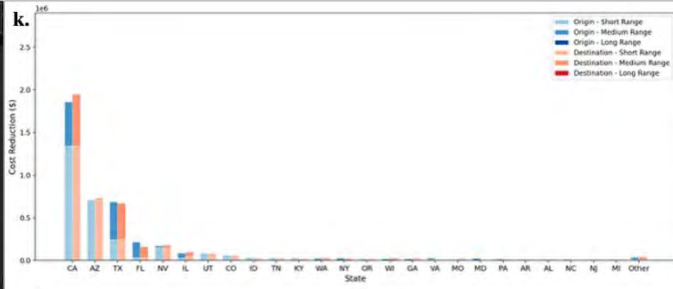

b.

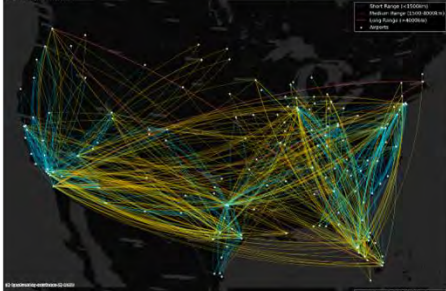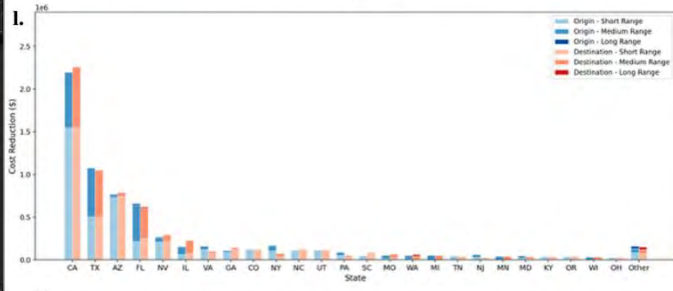

c.

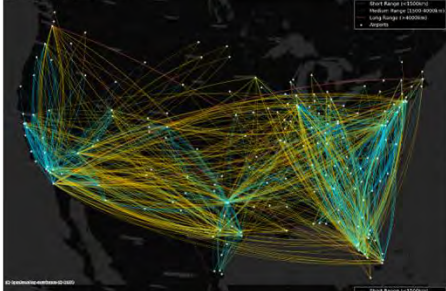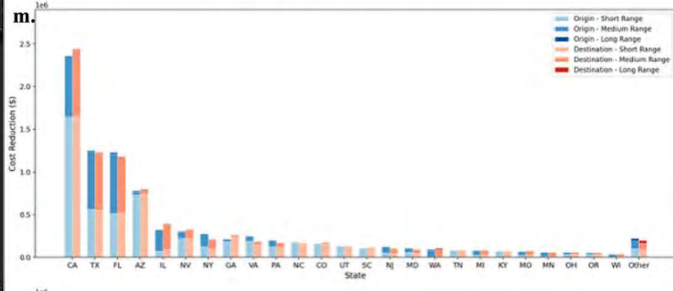

d.

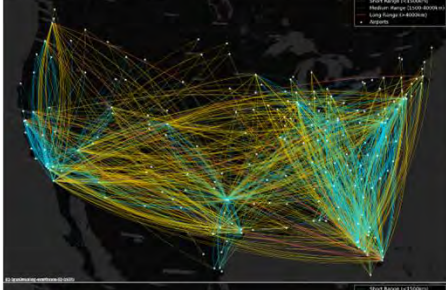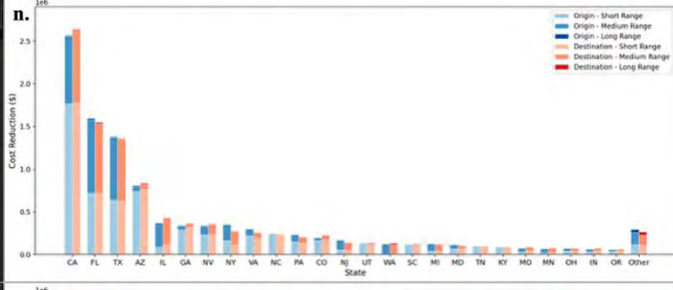

e.

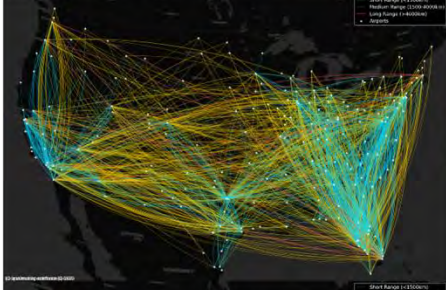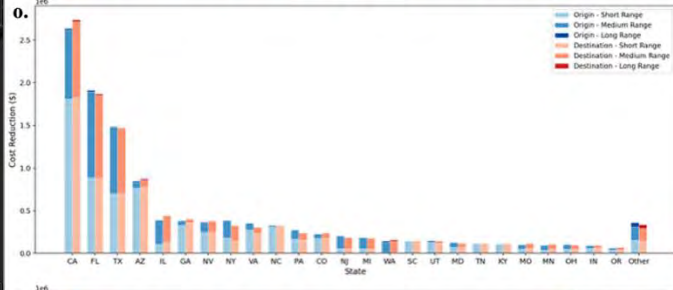

f.

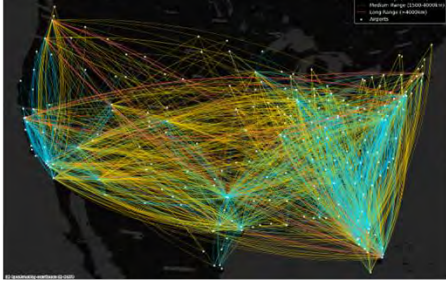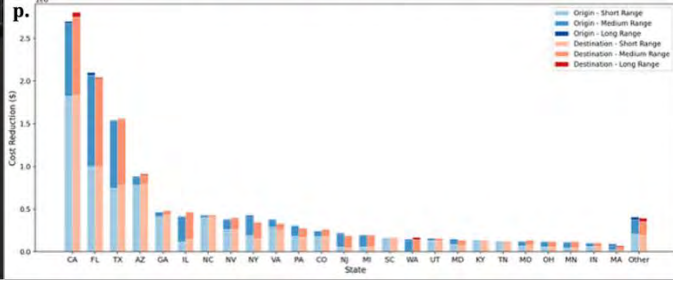

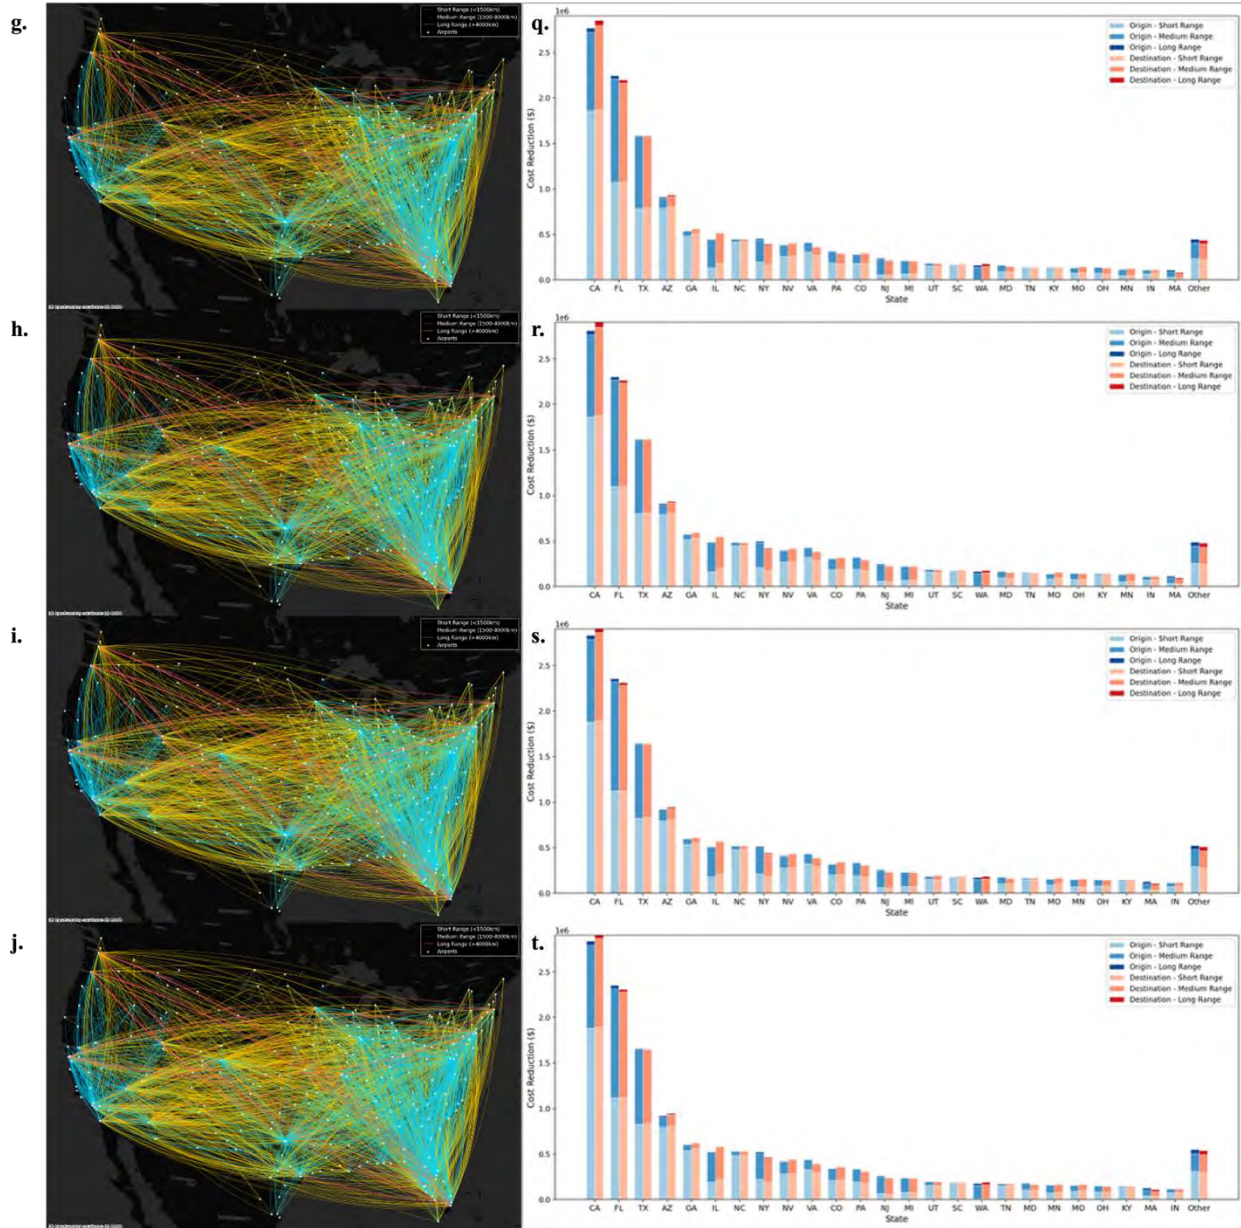

Figure 19 90% Flight selection across different solar farm market penetration rates

a-j, Spatial distribution of selected flights; each line represents a flight connection colored flight range categories: short-range (0-1,500 km, cyan), medium-range (1,500-4,000 km, yellow), and long-range (>4,000 km, magenta); and airports are shown as white points. k-t, State-level cost reductions aggregated by flight origin and destination states, with states ordered by total savings (\$); for each state, the left bar (blue shades) represents cost savings associated with flight origins, and the right bar (orange shades) represents savings associated with destinations; and bar segments are stacked by flight range category.

a.

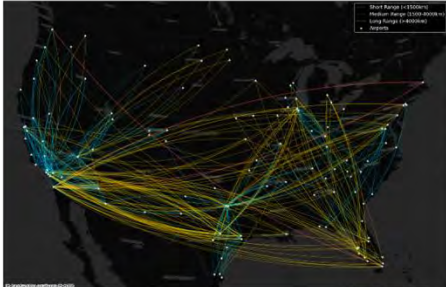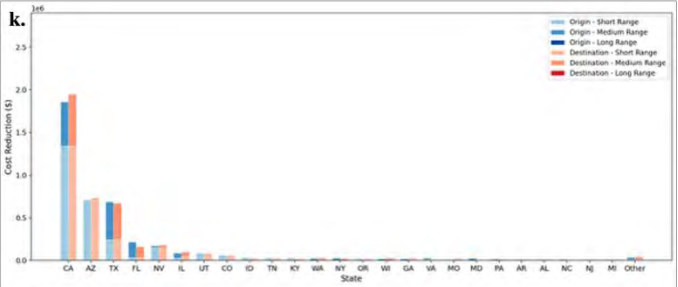

b.

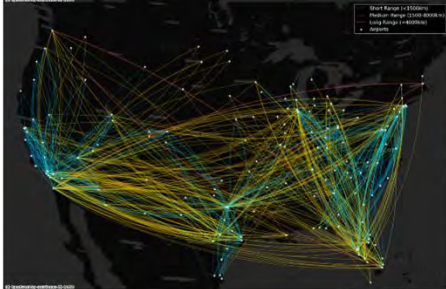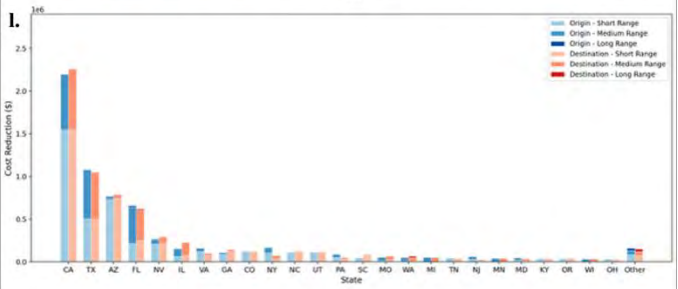

c.

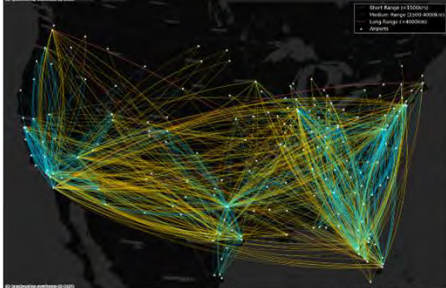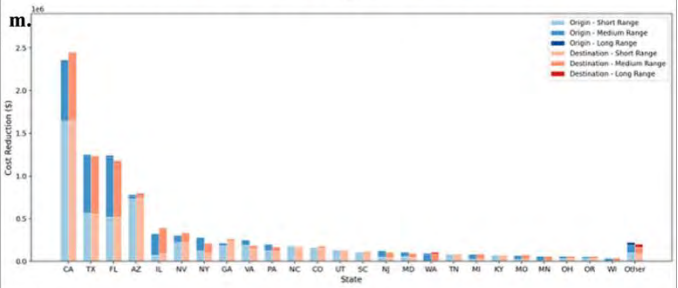

d.

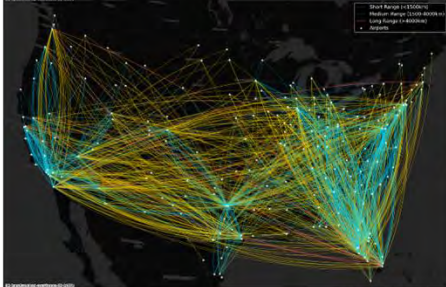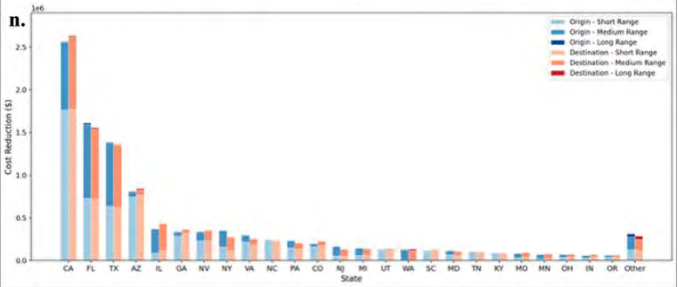

e.

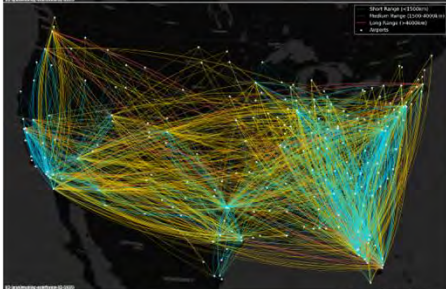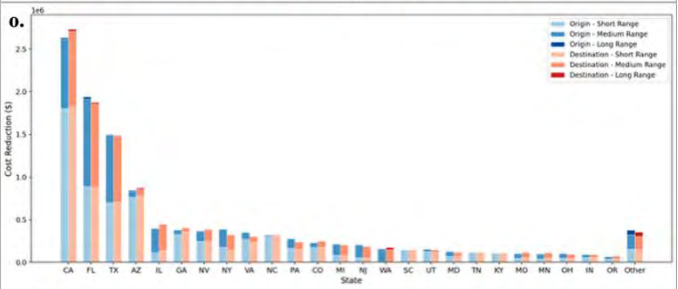

f.

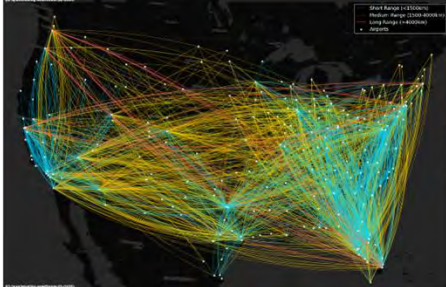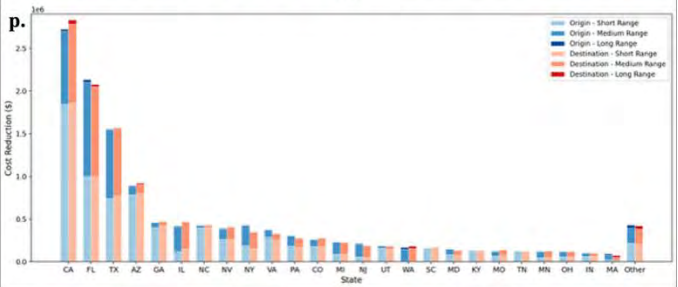

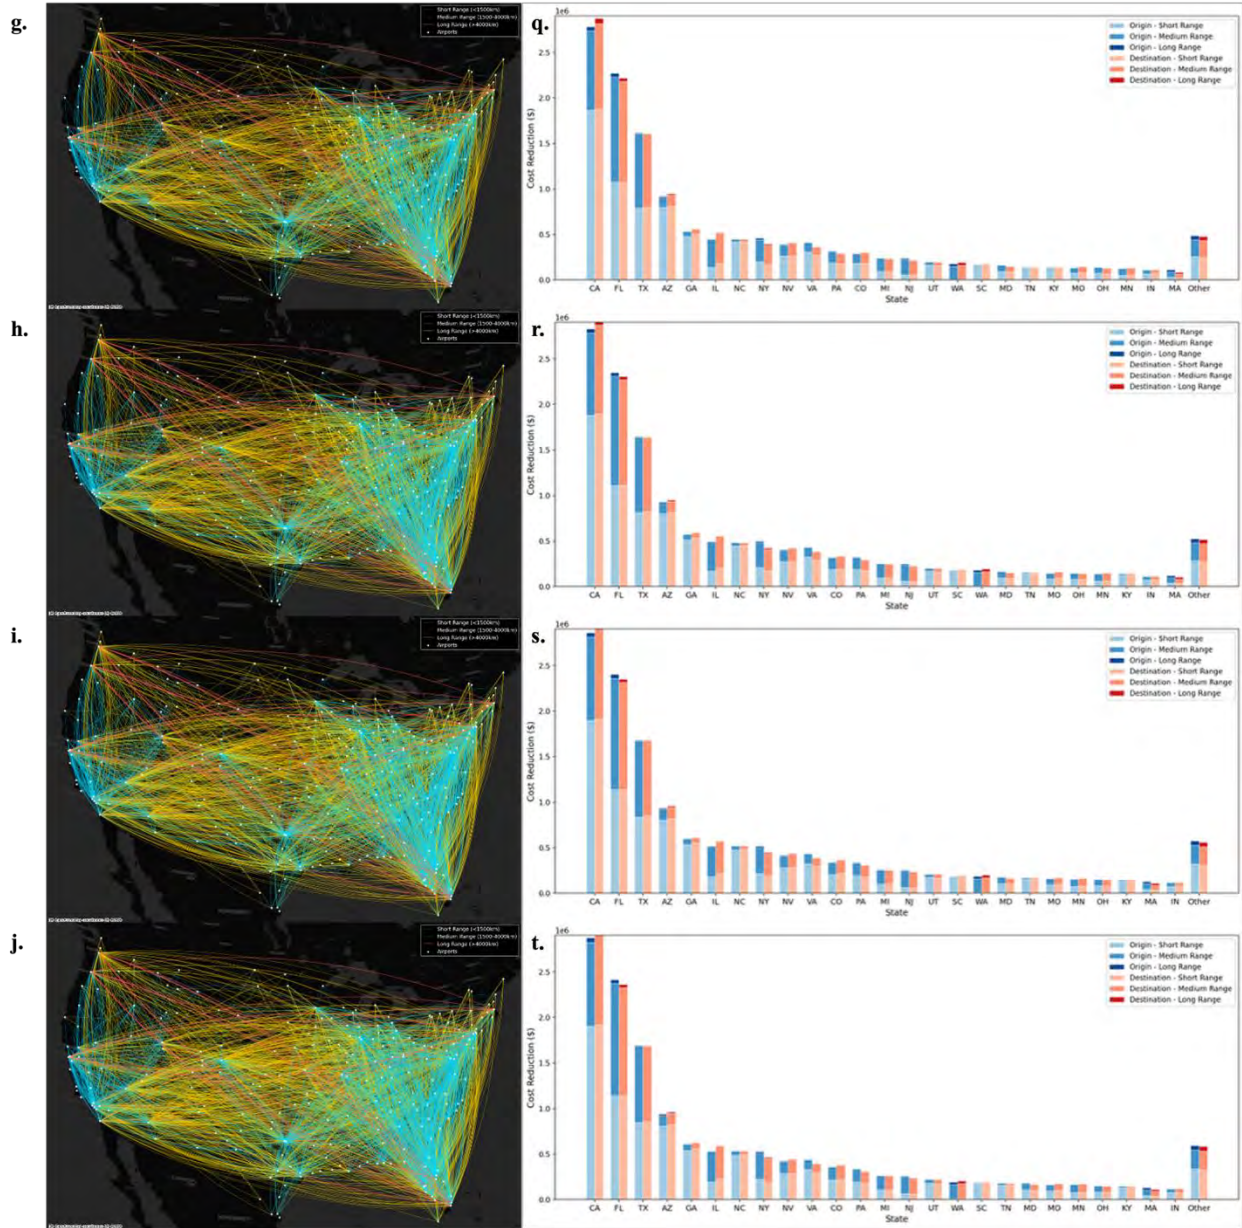

Figure 20 100% Flight selection across different solar farm market penetration rates

a-j, Spatial distribution of selected flights; each line represents a flight connection colored flight range categories: short-range (0-1,500 km, cyan), medium-range (1,500-4,000 km, yellow), and long-range (>4,000 km, magenta); and airports are shown as white points. k-t, State-level cost reductions aggregated by flight origin and destination states, with states ordered by total savings (\$); for each state, the left bar (blue shades) represents cost savings associated with flight origins, and the right bar (orange shades) represents savings associated with destinations; and bar segments are stacked by flight range category.

# Supplementary materials for case study

## Note 1 Solar farm case study

We selected a solar farm with the highest energy supplied for case study. The chosen solar farm is Desert Sunlight 300, LLC (Solar Farm ID 230), located in Riverside County, California (33.818886° N, 115.389389° W). Commissioned in 2014, this facility is a utility-scale ground-mounted photovoltaic (PV) plant that uses thin-film technology with a fixed-tilt configuration (tilt: 22°, azimuth: 120°). The site has an installed capacity of 313.7 MW AC and 399.0 MW DC, with an energy beaming safety capacity of 239.92 MW. Based on our case study analysis, during the study period (7th -13th April, 2025), this site can supply 657.88 MWh of energy, support 78.71 flight-hours, reduce CO2 emissions by 515,644 kg, and generate total cost reduction of \$181,036. The location and power transfer range of this solar farm are presented in Fig. 21, and the flights it can support are presented in Fig. 22.

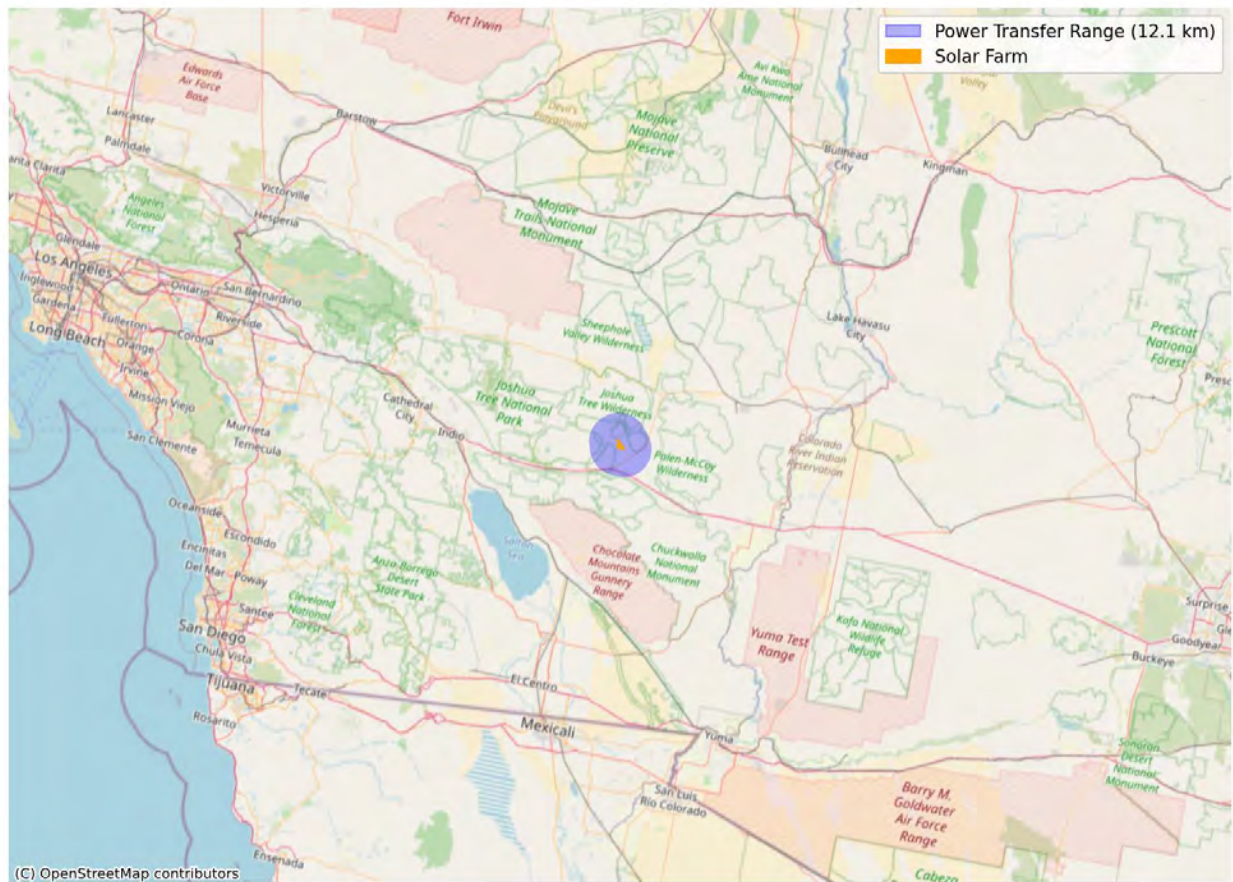

Figure 21 Location and power transfer range of the selected solar farm in the solar farm case study

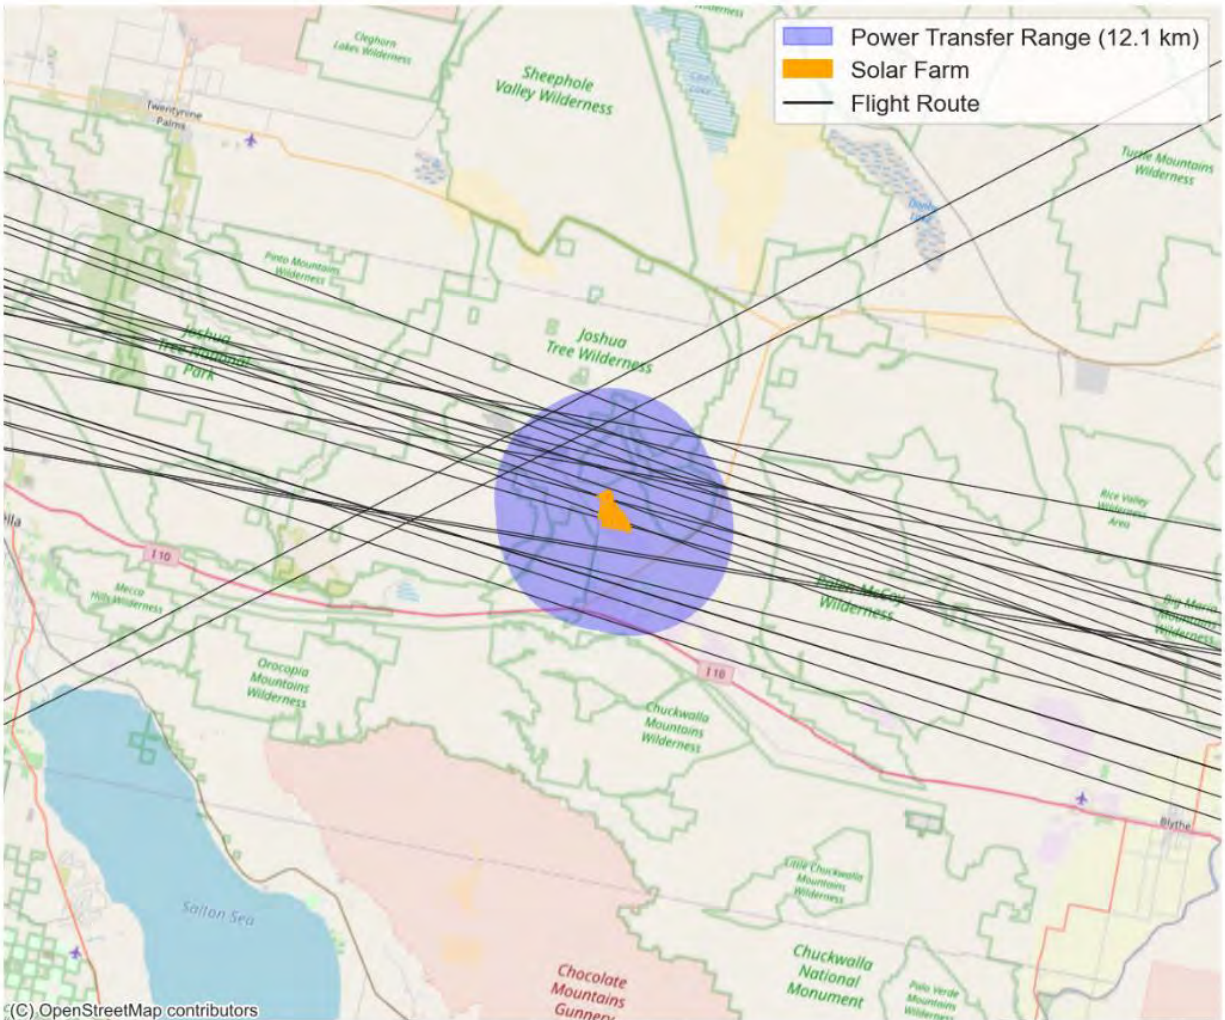

Figure 22 Flights supported by the selected solar farm in the solar farm case study

The energy supplied by the selected solar farm over the study period is shown in Fig. 23. Energy output remains very low during nighttime and early morning hours, then rises rapidly after sunrise, reaches daytime peaks of roughly 8 MWh, and declines again toward evening. This daily cycle is consistently observed throughout the week, reflecting the strong dependence of flight frequency. Although the overall temporal pattern is stable, the magnitude of daytime output varies, which is related to the flight schedule. In summary, the selected solar farm can provide substantial daytime energy supply, but its contribution is time dependent.

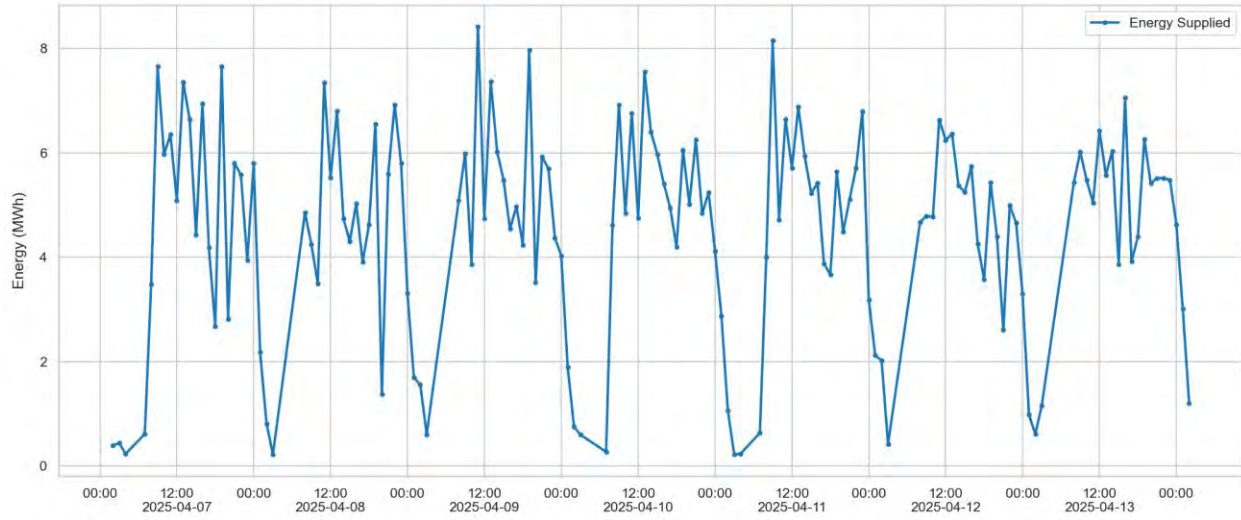

Figure 23 Energy supplied by the selected solar farm in the solar farm case study

## Note 2 Flight case study

We selected a case study flight between Austin (AUS) and Los Angeles (LAX), representing a major intercity corridor linking Texas and California, which have the top two energy supported among the states. The selected flight departed from AUS at 7:37 PM CDT and landed in LAX at 9:10 PDT on 8th April, 2025, for a total duration of 213 minutes. The flight received 3.71 MWh of transmitted energy in approximately 50 minutes of operation. Notably, 22 solar farms jointly supplied energy to this flight. The power beaming support reduced CO<sub>2</sub> emissions by 5,575 kg and generated total cost reduction of \$2,119. The flight and associated solar farms are shown in Fig. 24.

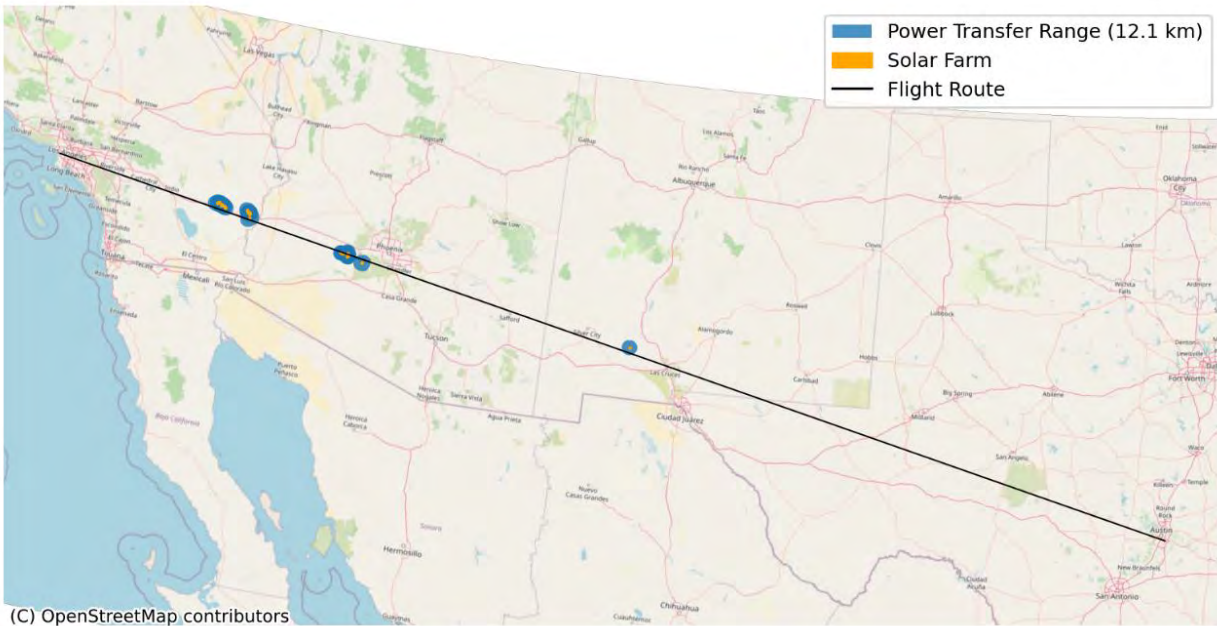

Figure 24 Selected flight and associated solar farms in the flight case study

The power received by the case study flight during operation is shown in Fig. 25. Power reception is highly intermittent, with long periods of zero supply interrupted by several short bursts of energy transfer. The most substantial energy transfer occurs later, where the flight passing the cluster of solar farms. The received power rises sharply and reaches maximum (10.3 MW). These high-power segments indicate that the flight receives energy only during specific time windows.

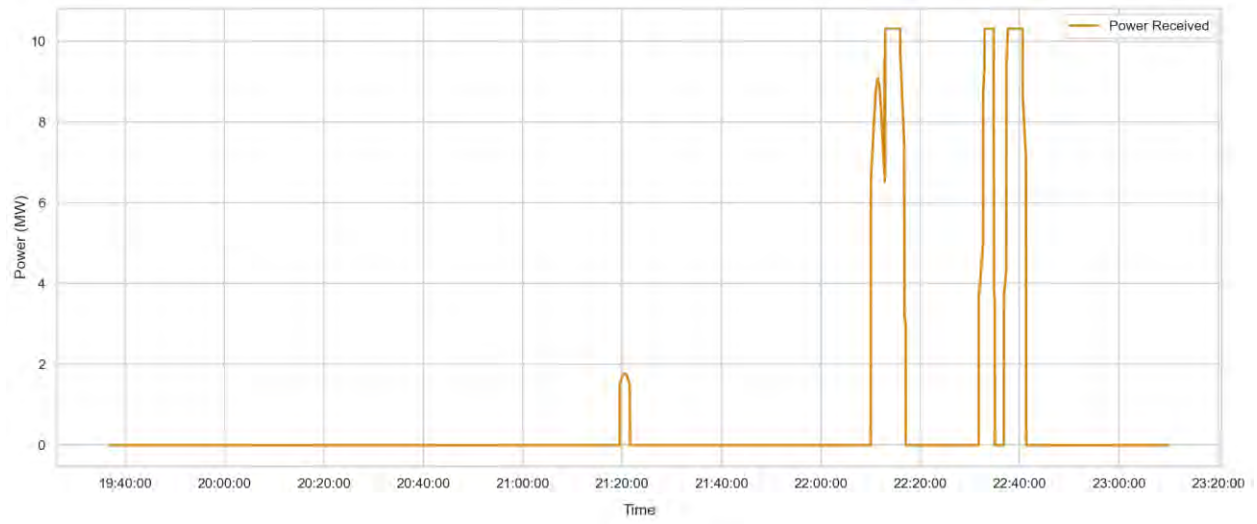

Figure 25 Power received by the selected flight in the flight case study
